# 1 **Meta-Analysis of the Gene Expression Profiles of Aging Brain Reveals a** 2 **Consistent Increase in Heterogeneity**

3

4 Ulaş Işıldak<sup>1</sup>, Mehmet Somel<sup>1</sup>, Janet M. Thornton<sup>2</sup>, Handan Melike Dönertaş<sup>2\*</sup>

5

6 <sup>1</sup>Department of Biological Sciences, Middle East Technical University, 06800, Ankara, Turkey.

7 <sup>2</sup>European Molecular Biology Laboratory, European Bioinformatics Institute, Wellcome Trust Genome  
8 Campus, Hinxton, Cambridge, CB10 1SD, UK.

9 \*correspondence: [donertas.melike@gmail.com](mailto:donertas.melike@gmail.com)

10

## 11 **ORCID**

12 *Ulaş Işıldak* - <https://orcid.org/0000-0001-6497-6254>

13 *Mehmet Somel* - <https://orcid.org/0000-0002-3138-1307>

14 *Janet M. Thornton* - <http://orcid.org/0000-0003-0824-4096>

15 *Handan Melike Dönertaş* - <http://orcid.org/0000-0002-9788-6535>

16

17

## 18 **Abstract**

19 In largely non-mitotic tissues such as the brain, cells are prone to a gradual accumulation of  
20 stochastic genetic and epigenetic alterations. This may lead to increased gene expression variation  
21 between cells and possibly also between individuals over time. Although increased inter-individual  
22 heterogeneity in gene expression during brain aging was previously reported, whether this process  
23 starts during development or if it is mainly restricted to the aging period has not yet been studied. The  
24 regulatory dynamics and functional significance of putative age-related heterogeneity are also  
25 unknown. Here we address these issues by a systematic analysis of 19 transcriptome datasets from  
26 diverse human brain regions in human covering the whole postnatal lifespan. Among all datasets, we  
27 observed a significant increase in inter-individual gene expression heterogeneity during aging (20 to  
28 98 years of age) compared to postnatal development (0 to 20 years of age). Increased heterogeneity  
29 during aging was consistent among different brain regions at the gene level. Genes showing  
30 increased heterogeneity were associated with biological processes that are known to be important for  
31 lifespan regulation and neuronal function, including longevity regulating pathway, autophagy, mTOR  
32 signaling, axon guidance, and synaptic function. Overall, our results show that increased gene  
33 expression heterogeneity during aging is a general effect in the human brain, and may influence  
34 aging-related changes in brain functions. We also provide the necessary functions to calculate  
35 heterogeneity change with age as an R package, 'hetAge'.

36

37 **Keywords:** aging, development, gene expression, transcriptome, heterogeneity, human, brain

38

## 39 Introduction

40 Aging is a complex process characterized by a gradual decline in maintenance and repair  
41 mechanisms, accompanied by an increase in genetic and epigenetic mutations, and oxidative  
42 damage to nucleic acids, protein and lipids (Gorbunova, Seluanov, Mao, & Hine, 2007; Lu et al.,  
43 2004). The human brain experiences dramatic structural and functional changes in the course of  
44 aging. These include decline in gray matter and white matter volumes (Sowell, Thompson, & Toga,  
45 2004), increase in axonal bouton dynamics (Grillo et al., 2013) and reduced synaptic plasticity, all  
46 processes that may be associated with decline in cognitive functions (Dorszewska, 2013). Changes  
47 during brain aging are suggested to be a result of stochastic processes, unlike changes associated  
48 with postnatal neuronal development that are known to be primarily controlled by adaptive regulatory  
49 processes (Polleux, Ince-Dunn, & Ghosh, 2007; Schratt, 2009; Stefani & Slack, 2008). The molecular  
50 mechanisms underlying age-related alteration of regulatory processes and eventually leading to  
51 aging-related phenotypes, however, are little understood.

52

53 Over the past decade, a number of transcriptome studies focusing on age-related changes in human  
54 brain gene expression profiles were published (Kang et al., 2011; Lu et al., 2004; Miller et al., 2014;  
55 Somel et al., 2010; Tebbenkamp, Willsey, State, & Šestan, 2014). These studies report aging-related  
56 differential expression patterns in many functions, including synaptic functions, energy metabolism,  
57 inflammation, stress response, and DNA repair. By analyzing age-related change in gene expression  
58 profiles in diverse brain regions, we previously showed that for many genes, gene expression  
59 changes occur in opposite directions during postnatal development (pre-20 years of age) and aging  
60 (post-20 years of age), which may be associated with aging-related phenotypes in healthy brain aging  
61 (Dönertaş et al., 2017). While different brain regions are associated with specific, and often  
62 independent, gene expression profiles (Kang et al., 2011; Miller et al., 2014; Tebbenkamp et al.,  
63 2014), these studies also show that age-related alteration of gene expression profiles during aging is  
64 a widespread effect across different brain regions.

65

66 One of the suggested effects of aging is increased variability between individuals and somatic cells,  
67 which has been previously reported by several studies. Some of these studies find an increase in  
68 age-related heterogeneity in heart, lung and white blood cells of mice (Angelidis et al., 2019; Bahar et  
69 al., 2006; Martinez-Jimenez et al., 2017), *Caenorhabditis elegans* (Herndon et al., 2002), □ and  
70 human twins (Fraga et al., 2005). A study analysing microarray datasets from different tissues of  
71 humans and rats also reported an increase in age-related heterogeneity in expression as a general  
72 trend (Somel, Khaitovich, Bahn, Pääbo, & Lachmann, 2006), although this study found no significant  
73 consistency across datasets, nor any significant enrichment in functional gene groups. That said, the  
74 generality of increase in expression heterogeneity remains unresolved. For instance, Viñuela et al.  
75 find more decrease than an increase in heterogeneity in human twins (Viñuela et al., 2018) and  
76 Ximerakis et al. show the direction of the heterogeneity change depends on cell type in aging mice

77 brain (Ximerakis et al., 2018). Using GTEx data covering different brain regions (20 to 70 years of  
78 age), Brinkmeyer-Langford et al. identify a set of differentially variable genes between age groups, but  
79 they do not observe increased heterogeneity at old age (Brinkmeyer-Langford, Guan, Ji, & Cai, 2016).  
80 Meanwhile, another study performing single-cell RNA sequencing of human pancreatic cells, identifies  
81 an increase in transcriptional heterogeneity and somatic mutations with age (Enge et al., 2017). A  
82 meta-analysis also suggested more shared expression patterns during development than in aging,  
83 implying an increase in inter-individual variability (Dönertaş et al., 2017). Likewise, a prefrontal cortex  
84 transcriptome analysis we recently conducted revealed a weak increase in age-dependent  
85 heterogeneity at the gene, transcriptome and pathway levels, irrespective of the preprocessing  
86 methods (Kedlian, Donertas, & Thornton, 2019).

87

88 Whether age-related increase in heterogeneity is a universal phenomenon thus remains contentious.  
89 Furthermore, where it can be detected, whether this is a time-dependent process that starts at the  
90 beginning of life or whether this increase and its functional consequences are only seen after  
91 developmental processes are completed, have not yet been explored. In this study, we retrieved  
92 transcriptome data from independent studies covering the whole lifespan, including data from diverse  
93 brain regions, and conducted a comprehensive analysis to identify the prevalence of age-related  
94 heterogeneity changes in human brain aging compared with those observed during postnatal  
95 development. We confirmed that increased age-related heterogeneity is a consistent trend in the  
96 human brain transcriptome during aging but not during development, and it is associated with the  
97 pathways and biological functions that are related to longevity and neuronal function.

98

## 99 **Results**

100 To investigate how heterogeneity in gene expression changes with age, we used 19 published  
101 microarray datasets from three independent studies. Datasets included 1,010 samples from 17  
102 different brain regions of 298 individuals whose ages ranged from 0 to 98 years (Table S1, Figure  
103 S1). In order to analyze the age-related change in gene expression heterogeneity during aging  
104 compared to the change in development, we divided datasets into two subsets as development (0 to  
105 20 years of age,  $n = 441$ ) and aging (20 to 98 years of age,  $n = 569$ ). We used the age of 20 to  
106 separate pre-adulthood and adulthood based on commonly used age intervals in earlier studies (see  
107 Methods). For the analysis, we focused only on the genes for which we have a measurement across  
108 all datasets ( $n = 11,137$ ).

109

### 110 **Age-related change in gene expression levels**

111 To quantify age-related changes in gene expression, we used a linear model between gene  
112 expression levels and age (see Methods, Figure S2). We transformed the ages to the fourth root  
113 scale before fitting the model as it provides relatively uniform distribution of sample ages across the  
114 lifespan (as in Somel et al., 2010), but we also confirmed that different age scales yield quantitatively

115 similar results (see Figure S3). We quantified expression change of each gene in aging and  
 116 development periods separately and considered regression coefficients from the linear model ( $\beta$   
 117 values) as a measure of age-related expression change (Figure S4, Table S2).  
 118

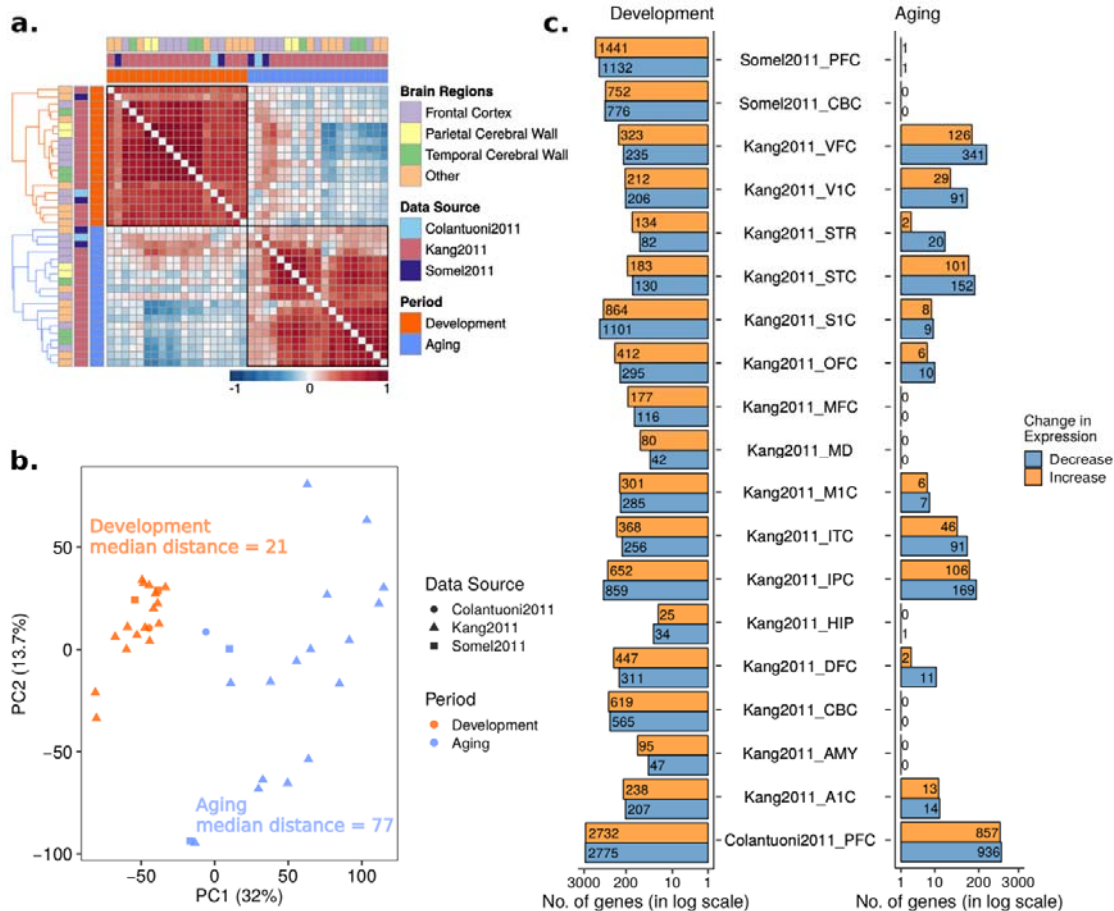

119  
 120 **Figure 1.** Age-related change in gene expression during postnatal development and aging. (a) Spearman  
 121 correlations among age-related expression changes ( $\beta$  values) across datasets. The color of the squares  
 122 indicates if the correlation between the corresponding pair of datasets (across  $\beta$  values of 11,137 common  
 123 genes) is positive (red) or negative (blue), while darker color specifies a stronger correlation. Diagonal values  
 124 were removed in order to enhance visibility. Annotation rows and columns indicate data source, brain region and  
 125 period of each dataset. Hierarchical clustering was performed for each period separately (color of the  
 126 dendrogram indicates periods) to determine the order of datasets. (b) Principal component analysis (PCA)  
 127 of age-related expression changes during aging and development. The analysis was performed on age-related  
 128 expression change values of 11,137 common genes among all 38 datasets. The values of the first principal  
 129 component on the x-axis and second principal component on the y-axis were drawn, where the values in the  
 130 parenthesis indicate the variation explained by the corresponding principal component. Median Euclidean  
 131 pairwise distances among development and aging datasets calculated using PC1 and PC2 were annotated on  
 132 the figure. Different shapes show different data sources and colors show development (dark orange) and aging  
 133 (blue) (c) Number of significant (FDR corrected  $p < 0.05$ ) gene expression changes in development (left panel)

134 *and aging (right panel). The x-axis shows the number of genes in the log scale. The color of the bars shows the*  
135 *direction of change, decrease (steel gray), and increase (orange). The exact number of genes are also displayed*  
136 *on the plot.*

137

138 We first analyzed similarity in age-related expression changes across datasets by calculating pairwise  
139 Spearman's correlation coefficients among the  $\beta$  values (Figure 1a). Both development (median  
140 correlation coefficient = 0.56, permutation test  $p < 0.001$ , Figure S5a) and aging datasets (median  
141 correlation coefficient = 0.43, permutation test  $p = 0.003$ , Figure S5b) showed moderate correlation  
142 with the datasets within the same period. Although the difference between dataset correlations within  
143 development and aging datasets was not significant (permutation test  $p = 0.1$ , Figure S6a), weaker  
144 consistency during aging may reflect the stochastic nature of aging, causing increased heterogeneity  
145 between aging datasets.

146

147 The principal component analysis (PCA) of age-related expression changes ( $\beta$ ) revealed distinct  
148 clusters of development and aging datasets (Figure 1b). Moreover, aging datasets were more  
149 dispersed than development datasets (median pairwise Euclidean distances between PC1 and PC2  
150 were 77 for aging and 21 for development), which may again reflect stochasticity in gene expression  
151 change during aging and can indicate more heterogeneity among different brain regions or datasets  
152 during aging than in development.

153

154 We next identified genes showing significant age-related expression change (FDR-corrected  $p <$   
155  $0.05$ ), for development and aging datasets separately (Figure 1c). Development datasets showed  
156 more significant changes compared to aging (permutation test  $p = 0.003$ , Figure S6c), which may  
157 again indicate higher expression variability among individuals during aging. The direction of change in  
158 development was mostly positive (14 datasets with more positive and 5 with more negative), whereas  
159 in aging datasets, we observed more genes with a decrease in expression level (13 datasets with  
160 more genes decreasing expression and 5 with no significant change, and 1 with an equal number of  
161 positive and negative changes).

162

### 163 **Age-related change in gene expression heterogeneity**

164 To assess age-related change in heterogeneity, we obtained the unexplained variance (residuals)  
165 from the linear models used to calculate the change in gene expression level. For each gene in each  
166 dataset, we separately calculated Spearman's correlation coefficient ( $\rho$ ) between the absolute value  
167 of residuals and age, irrespective of whether the gene shows a significant change in expression (see  
168 Methods, Figure S2). We considered  $\rho$  values as a measure of heterogeneity change, where positive  
169 values mean an increase in heterogeneity with age (Table S2). We also repeated this approach using  
170 loess regression instead of a linear model between expression level and age, and found high  
171 correspondence between  $\rho$  values based on linear and loess regression models (Figure S7). Still,

172 loess regression was more sensitive to the changes in sample sizes and parameters and we therefore  
173 continued downstream analyses with the  $\rho$  estimates based on the residuals from the linear model.

174

175 We next asked if datasets show similar  $\rho$ , *i.e.* age-related changes in heterogeneity, by calculating  
176 pairwise Spearman's correlation between pairs of datasets, across shared genes (Figure 2a). Unlike  
177 the correlations among expression level changes,  $\rho$  values did not show a higher consistency during  
178 development. In fact, although the difference is not significant (permutation test  $p = 0.2$ , Figure S6b),  
179 the median value of the correlation coefficients was higher in aging (median correlation coefficient =  
180 0.21, permutation test  $p = 0.24$ , Figure S5c), than in development (median correlation coefficient =  
181 0.11, permutation test  $p = 0.25$ , Figure S5d).

182

183 A principal component analysis (PCA) showed that, like expression change, heterogeneity change  
184 with age can also differentiate aging datasets from development (Figure 2b). Similar to the pairwise  
185 correlations (Figure 2a), aging datasets clustered more closely than development datasets (median  
186 pairwise Euclidean distances between PC1 and PC2 are 41 and 44 for aging and development,  
187 respectively). Both observations imply more similar changes in heterogeneity during aging.

188

189 Using the  $p$ -values from Spearman's correlation between age and the absolute value of residuals for  
190 each gene, we then investigated the genes showing a significant change in heterogeneity during  
191 aging and development (FDR corrected  $p$ -value  $< 0.05$ ). We found almost no significant change in  
192 heterogeneity during development, except for the Colantuoni2011 dataset, for which we have high  
193 statistical power due to its large sample size. In aging datasets, on the other hand, we observed more  
194 genes with significant changes in heterogeneity (permutation test  $p = 0.06$ , Figure S6d) and the  
195 majority of the genes with significant changes in heterogeneity tended to increase in heterogeneity  
196 (Figure 2c). However, the genes showing a significant change did not overlap across aging datasets  
197 (Figure S8).

198

199 Nevertheless, our analyses indicated relatively more consistent heterogeneity changes among  
200 datasets in aging compared to development, implying that heterogeneity change could be a  
201 characteristic linked to aging (see Discussion).

202

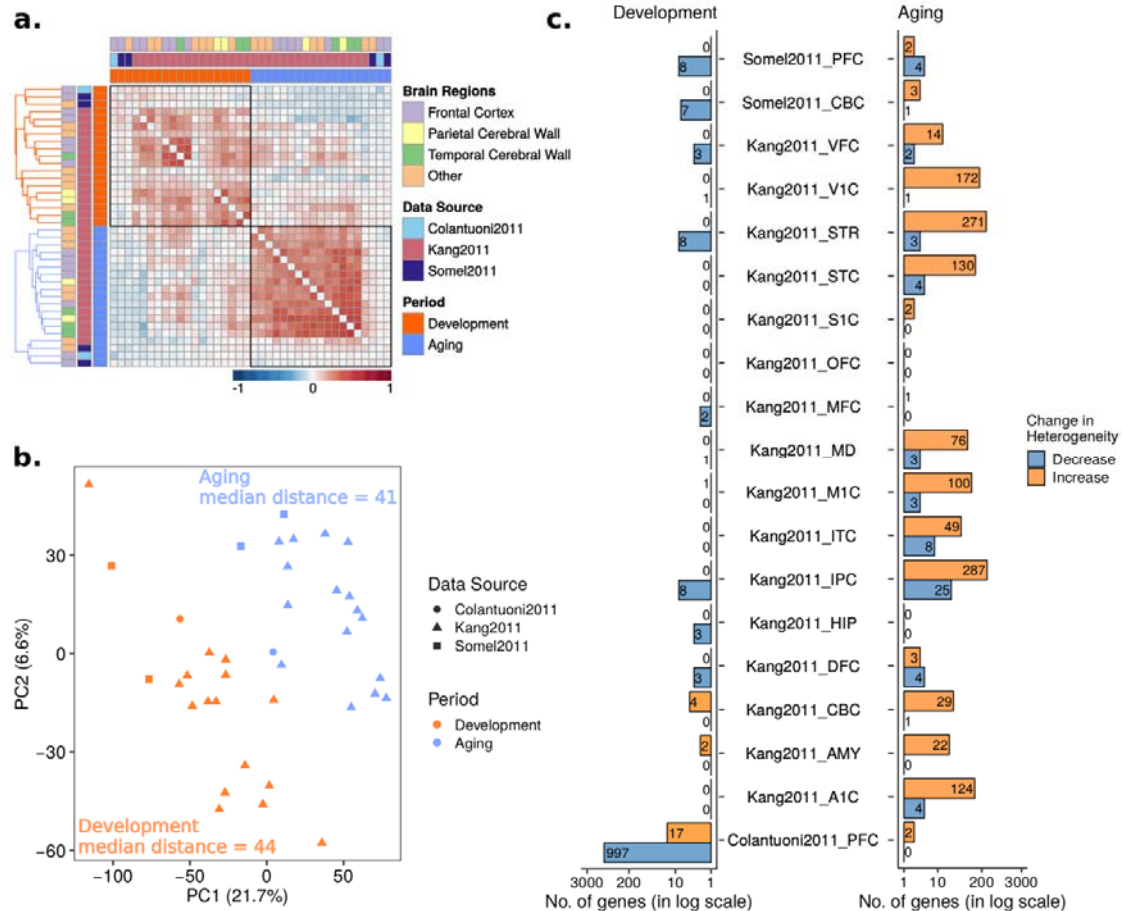

203

204

205

206

207

208

209

210

211

212

213

214

215

216

217

218

**Figure 2.** Age-related change in gene expression heterogeneity during development and aging. The procedures are similar to those in Figure 1, except, age-related heterogeneity changes ( $p$  values) were used instead of expression changes ( $\beta$  values). (a) Spearman correlations among age-related heterogeneity changes ( $\rho$  values) across datasets. (b) Principal component analysis (PCA) of heterogeneity change with age. (c) The number of genes showing significant heterogeneity change in aging and development.

### Consistent increase in heterogeneity during aging

As our previous analyses suggested age-related changes in heterogeneity can differentiate development from aging and show more similarity during aging, we sought to characterize the genes displaying such changes. Since the significance of the changes is highly dependent on the sample size, instead of focusing on significant genes identified within individual datasets, we leveraged upon the availability of multiple datasets and focused on their shared trends, capturing weak but reproducible trends across multiple datasets (as in Dönertaş et al., 2017). Consequently, we used the level of consistency in age-related heterogeneity change across datasets to sort genes.

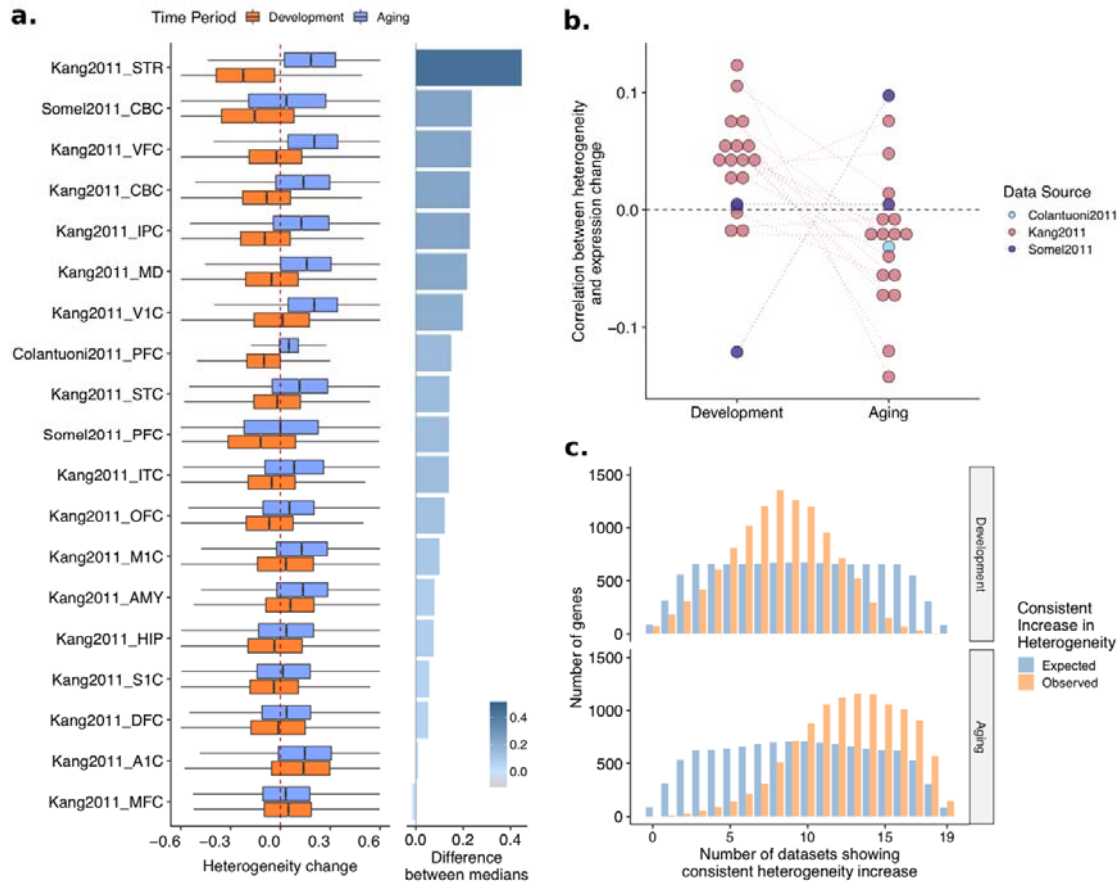

219

220 **Figure 3.** (a) Boxplots, showing distributions of age-related heterogeneity changes ( $p$  values) of 11,137  
221 common genes for each dataset and period separately. The dotted red line (vertical line at  $x = 0$ ) reflects no  
222 change in heterogeneity. The difference between median heterogeneity change in aging and development is  
223 given as a bar plot on the right panel. Datasets are ordered by the differences in median heterogeneity changes  
224 in aging and development. (b) The relationship between expression and heterogeneity change with age.  
225 Spearman correlation analysis was performed between age-related expression changes ( $\beta$  values) and age-  
226 related heterogeneity changes ( $p$  values) of 11,137 common genes, separately for each dataset. The dotted gray  
227 line at  $y = 0$  reflects no correlation between, expression and heterogeneity. (c) Expected and observed  
228 consistency in the heterogeneity change across datasets in development and aging. There is a significant shift  
229 toward heterogeneity increase in aging (permutation test  $p < 10^{-7}$ ) (lower panel), while there is no significant  
230 consistency in either direction in development (upper panel). The expected distribution is constructed using a  
231 permutation scheme that accounts for the dependence among datasets and is more stringent than random  
232 permutations (see Figure S10 for details).

233

234 We first examined profiles of age-related heterogeneity change in aging and development. Among  
235 aging datasets 18/19 showed more increase than decrease in heterogeneity with age (median  $p > 0$ ,  
236 i.e. higher numbers of genes with increase), while the median heterogeneity change in one dataset  
237 was zero. In development, on the other hand, only 5/19 datasets showed more increase in



238 heterogeneity, while the remaining 14/19 datasets showed more decrease with age (median  $\rho < 0$ )  
239 (Figure 3a). The age-related change in heterogeneity during aging was significantly higher than during  
240 development (permutation test  $p < 0.001$ , Figure S6e). We also checked if there is a relationship  
241 between changes in heterogeneity during development and during aging (e.g. if those genes that  
242 decrease in heterogeneity tend to increase in heterogeneity during aging) but did not find any  
243 significant trend (Figure S9).

244

245 A potential explanation why we see different patterns of heterogeneity change with age in  
246 development and aging could be the accompanying changes in the expression levels, as it is  
247 challenging to remove dependence between the mean and variance. To address this possibility, we  
248 first calculated Spearman's correlation coefficient between the changes in heterogeneity ( $\rho$  values)  
249 and expression ( $\beta$  values), for each dataset. Overall, all datasets had values close to zero, suggesting  
250 the association is not strong. Surprisingly, we saw an opposing profile for development and aging;  
251 while the change in heterogeneity and expression were positively correlated in development, they  
252 showed a negative correlation in aging (Figure 3b).

253

254 Having observed both a tendency to increase and a higher consistency in heterogeneity change  
255 during aging, we asked which genes show consistent increase in heterogeneity across datasets in  
256 aging and development. We therefore calculated the number of datasets with an increase in  
257 heterogeneity during development and aging for each gene (Figure 3c). To calculate significance and  
258 expected consistency, while controlling for dataset dependence, we performed 1,000 random  
259 permutations of individuals' ages and re-calculated the heterogeneity changes (see Methods). In  
260 development, there was no significant consistency in heterogeneity change in either increase or  
261 decrease. During aging, however, there was a significant signal of consistent heterogeneity increase,  
262 i.e. more genes showed consistent heterogeneity increase across aging datasets than randomly  
263 expected (Figure 3c, lower panel). We identified 147 common genes with a significant increase in  
264 heterogeneity across all aging datasets (permutation test  $p < 0.001$ , Table S3). Based on our  
265 permutations, we estimated that 84/147 genes could be expected to have consistent increase just by  
266 chance, suggesting only ~40% true positives. In development, in contrast, there was no significant  
267 consistency in heterogeneity change in either direction (increase or decrease). Nevertheless,  
268 comparing the consistency in aging and development, there was an apparent shift towards a  
269 consistent increase in aging – even if we cannot confidently report the genes that become significantly  
270 more heterogeneous with age across multiple datasets.

271

## 272 **Heterogeneity Trajectories**

273 We next asked if there are specific patterns of heterogeneity change, e.g. increase only after a certain  
274 age. We used the genes with a consistent increase in heterogeneity with age during aging ( $n = 147$ )  
275 to explore the trajectories of heterogeneity change (Figure 4). Genes grouped with k-means clustering

276 revealed three main patterns of heterogeneity increase (Table S3): i) genes in clusters 3 and 7 show  
 277 noisy but a *steady increase* throughout aging, ii) genes in clusters 4, 5 and 8 show *increase in early*  
 278 *aging but a later slight decrease*, revealing a reversal (up-down) pattern, and iii) the remaining genes  
 279 in cluster 1, 2 and 6 *increase in heterogeneity dramatically after the age of 60*. We next asked if these  
 280 genes have any consistent heterogeneity change pattern in development (Figure S11), but most of  
 281 the clusters showed no or only weak age-related changes during development. We also analyzed the  
 282 accompanying changes in mean expression levels for these clusters. Except for cluster 1, which  
 283 shows a decrease in expression level at around the age of 60 and then shows a dramatic increase, all  
 284 clusters show a steady scaled mean expression level at around zero, *i.e.* different genes in a cluster  
 285 show different patterns (Figure S12).

286

287 We further tested the genes showing dramatic heterogeneity increase after the age of 60 (clusters 1,  
 288 2 and 6) for association with Alzheimer's Disease, as the disease incidence increases after 60 (Evans  
 289 et al., 1989) as well; however, we found no evidence for such an association (see Figure S13).

290

291

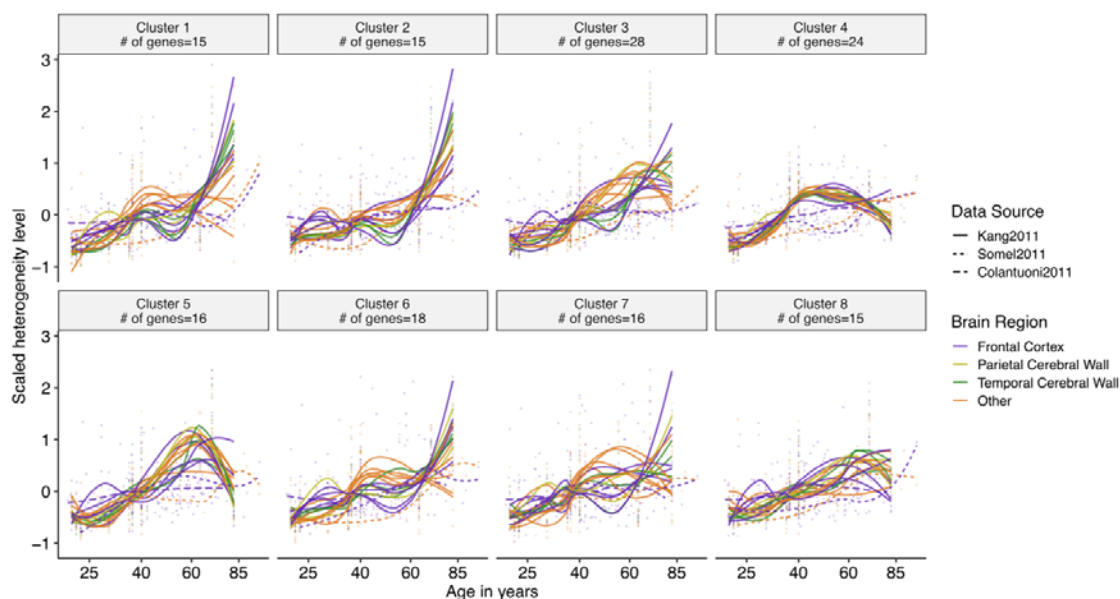

292

293 **Figure 4.** Clusters of genes showing a consistent heterogeneity increase in aging ( $n = 147$ ). Clustering was  
 294 performed based on patterns of the change in heterogeneity, using the *k*-means clustering method (see  
 295 Methods). The *x*- and *y*-axes show age and heterogeneity levels, respectively. Mean heterogeneity change for  
 296 the genes in each cluster was drawn by spline curves. The colors and line-types of curves specify different brain  
 297 regions and data sources, respectively.

298

### 299 Functional analysis

300 To examine the functional associations of heterogeneity changes with age, we performed gene set  
 301 enrichment analysis using KEGG pathways (Kanehisa, Sato, Furumichi, Morishima, & Tanabe, 2019),

302 Gene Ontology (GO) categories (Ashburner et al., 2000; The Gene Ontology Consortium, 2019),  
 303 Disease Ontology (DO) categories (Kibbe et al., 2015), Reactome pathways (Fabregat et al., 2018),  
 304 transcription factor (TF) targets (TRANSFAC) (Matys et al., 2003), and miRNA targets (MiRTarBase)  
 305 (Chou et al., 2016). Specifically, we rank-ordered genes based on the number of datasets that show a  
 306 consistent increase in heterogeneity and asked if the extremes of this distribution are associated with  
 307 the gene sets that we analyzed. There was no significant enrichment for any of the functional  
 308 categories and pathways for the consistent changes in development. The significantly enriched KEGG  
 309 pathways for the genes that become consistently heterogeneous during aging included multiple  
 310 KEGG pathways known to be relevant for aging, including the longevity regulating pathway,  
 311 autophagy (Rubinsztein, Mariño, & Kroemer, 2011), mTOR signaling (Johnson, Rabinovitch, &  
 312 Kaeberlein, 2013) and FoxO signaling (Martins, Lithgow, & Link, 2016) (Figure 5a). Among the  
 313 pathways with a significant association (listed in Figure 5a), only protein digestion and absorption,  
 314 primary immunodeficiency, linoleic acid metabolism, and fat digestion and absorption pathways had  
 315 negative enrichment scores, meaning these pathways were significantly associated with the genes  
 316 having the least number of datasets showing an increase. However, it is important to note that this  
 317 does not mean these pathways have a decrease in heterogeneity as the distribution of consistent  
 318 heterogeneity levels is skewed (Figure 3c, lower panel). We also calculated if the KEGG pathways  
 319 that we identified are particularly enriched in any of the heterogeneity trajectories we identified.  
 320 Although we lack the necessary power to test the associations statistically due to small number of  
 321 genes, we saw that i) group 1, which showed a stable increase in heterogeneity, is associated more  
 322 with the metabolic pathways and mRNA surveillance pathway, ii) group 2, which showed first an  
 323 increase and a slight decrease at later ages, is associated with axon guidance, mTOR signaling, and  
 324 phospholipase D signaling pathways, and iii) group 3, which showed a dramatic increase after age of  
 325 60, is associated with autophagy, longevity regulating pathway and FoxO signaling pathways. The full  
 326 list is available as Figure S14.  
 327

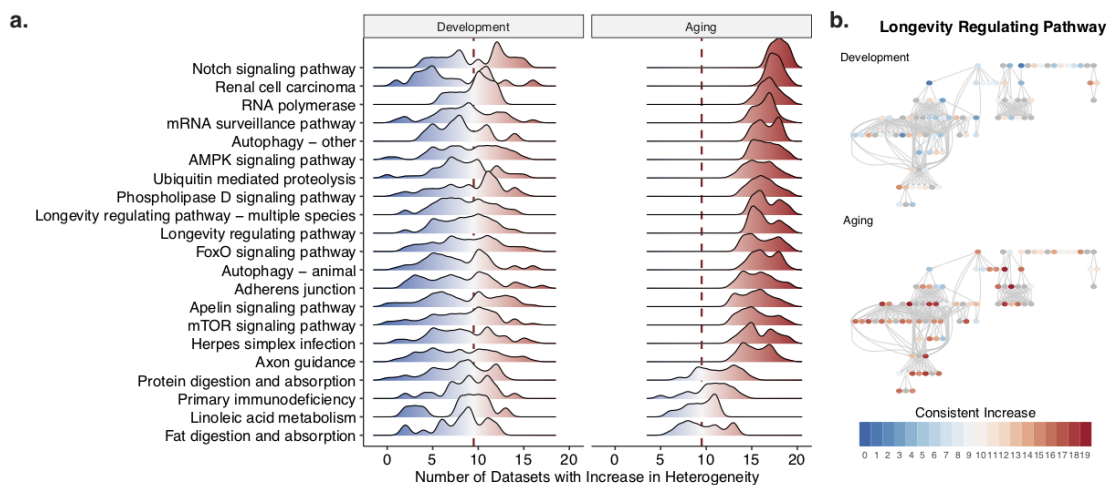

328

329 **Figure 5.** Functional analysis of consistent heterogeneity changes. (a) Distribution of consistent heterogeneity  
330 increase for the significantly enriched KEGG pathways, in development and aging. x- and y-axes show the  
331 number of datasets with a consistent increase and the density for each significant pathway, respectively. The  
332 dashed red line shows  $x = 9.5$ , which is the middle point for 19 datasets, representing no tendency to increase or  
333 decrease. Values higher than 9.5, shown with red color, indicate an increase in heterogeneity while values lower  
334 than 9.5, shown with blue color, indicate a decrease in heterogeneity and the darkness shows the consistency in  
335 change across datasets. b) The longevity regulating pathway (KEGG Pathway ID: hsa04211), exemplifying the  
336 distribution of the genes (circles), their heterogeneity across datasets (color – the same color scheme as panel  
337 (a)), and their relationship in the pathway (edges). More detailed schemes for all significant pathways with the  
338 gene names are given as SI.

339

340 The distribution of consistent heterogeneity in development and aging also showed a clear difference.  
341 The pathway scheme for the longevity regulating pathway (Figure 5b), colored based on the number  
342 of datasets with a consistent increase, shows how particular genes compare between development  
343 and aging. The visualizations for all significant pathways, including the gene names are given in the  
344 Supplementary Information. Other significantly enriched gene sets, including GO, Reactome, TF and  
345 miRNA sets, are included as Tables S4-11. In general, while the consistent heterogeneity changes in  
346 development did not show any enrichment (except for miRNAs, see Table S11), we detected a  
347 significant enrichment for the genes that become more heterogeneous during aging, with the  
348 exception that Disease Ontology terms were not significantly associated with consistent changes in  
349 either development or aging. The gene sets included specific categories such as autophagy and  
350 synaptic functions as well as broad functional categories such as regulation of transcription and  
351 translation processes, cytoskeleton or histone modifications. We also performed GSEA for each  
352 dataset separately and confirmed that these pathways show consistent patterns in aging (Figure S15-  
353 S19). There were 30 significantly enriched transcription factors, including *EGR* and *FOXO*, and 99  
354 miRNAs (see Table S9-10 for the full list). We also asked if the genes that become more  
355 heterogenous consistently across datasets are known aging-related genes, using the GenAge Human  
356 gene set (Tacutu et al., 2018), but did not find a significant association (Figure S20).

357

358 It has been reported that the total number of distinct regulators of a gene (apart from its specific  
359 regulators) is correlated with gene expression noise (Barroso, Puzovic, & Dutheil, 2018). Accordingly,  
360 we asked if the total number of transcription factors (TFs) or miRNAs regulating a gene might be  
361 related to the heterogeneity change with age (Figure 6). We calculated the correlations between the  
362 total number of regulators and the heterogeneity changes and found a mostly positive (18 / 19 for  
363 miRNA and 15 / 19 for TFs), and higher correlation between change in heterogeneity and the number  
364 of regulators in aging ( $p = 0.007$  for miRNA and  $p = 0.045$  TFs). We further tested the association  
365 while controlling for the expression changes in development and aging since regulation of expression  
366 changes during development could confound a relationship. However, we found that the pattern is  
367 mainly associated with the genes that show a decrease in expression during aging, irrespective of  
368 their expression during development (Figure S21).

369

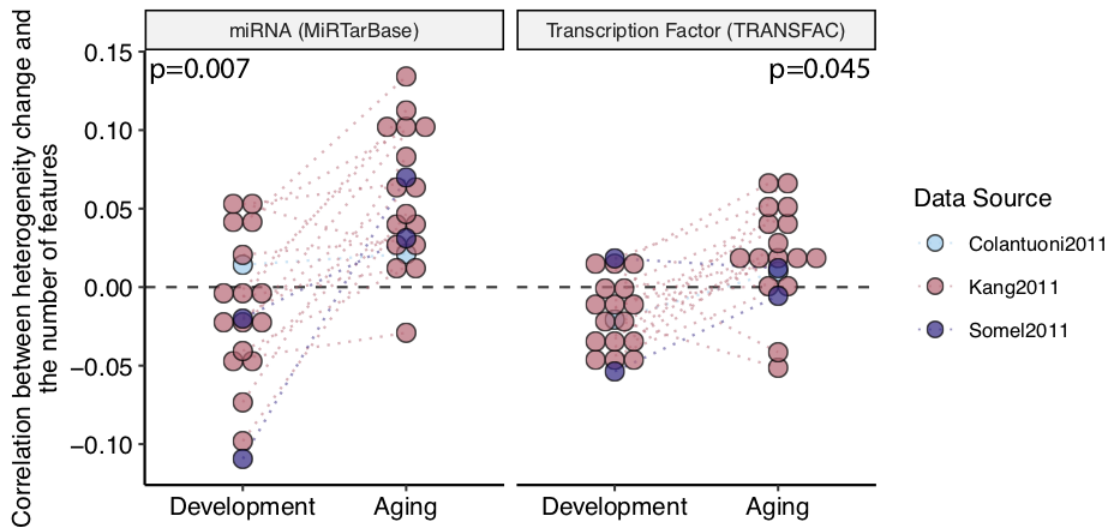

370

371 **Figure 6.** Correlation between the change in heterogeneity and number of transcriptional regulators, *i.e.* miRNA  
372 and transcription factors. Each point represents a dataset, and the color shows the data source. *p*-values are  
373 calculated using a permutation test. The dashed line at  $y = 0$  shows zero correlation.

374

375 We further tested if genes with a consistent heterogeneity increase in aging are more central in the  
376 protein interaction network using STRING database (von Mering et al., 2005). Using multiple cutoffs  
377 and repeating the analysis, we observed a higher degree of interactions for the genes with increasing  
378 heterogeneity (Figure S22).

379

380 Johnson and Dong et al. previously compiled a list of traits that are age-related and have been  
381 sufficiently tested for genome-wide associations ( $n = 39$ ) (Johnson, Dong, Vijg, & Suh, 2015). Using  
382 the genetic associations for GWAS Catalog traits, we tested if there are significantly enriched traits for  
383 the consistent changes in heterogeneity during aging (Table S12). Although there was no significant  
384 enrichment, all these age-related terms had positive enrichment scores, *i.e.* they all tended to include  
385 genes that consistently become more heterogeneous with age during aging.

386

387 Using cell-type specific transcriptome data generated from FACS-sorted cells in mouse brain (Cahoy  
388 et al., 2008), we also analyzed if there is an association between genes that become heterogeneous  
389 with age and cell-type specific genes, which could be expected if brain cell-type composition  
390 progressively varied among individuals with age. Although there was an overlap with  
391 oligodendrocytes and myelinated oligodendrocytes, there was no significant enrichment (which could  
392 be attributed to low power due to small overlap between aging and cell-type specific expression  
393 datasets) (Figure S23).

394

## 395 **Discussion**

396 Aging is characterized by a gradual decrease in the ability to maintain homeostatic processes, which  
397 leads to functional decline, age-related diseases, and eventually to death. This age-related  
398 deterioration, however, is thought as not a result of expression changes in a few individual genes, but  
399 rather as a consequence of an age-related alteration of the whole genome, which could be a result of  
400 an accumulation of both epigenetic and genetic errors in a stochastic manner (Enge et al., 2017; Vijg,  
401 2004). This stochastic nature of aging impedes the identification of conserved age-related changes in  
402 gene expression from a single dataset with a limited number of samples.

403

404 In this study, we examined 19 gene expression datasets compiled from three independent studies to  
405 identify the changes in gene expression heterogeneity with age. While all datasets have samples  
406 representing the whole lifespan, we separated postnatal development (0 to 20 years of age) and  
407 aging (20 to 98 years of age) by the age of 20, as this age is considered to be a turning-point in gene  
408 expression trajectories (Dönertaş et al., 2017). We implemented a regression-based method and  
409 identified genes showing a consistent change in heterogeneity with age, during development and  
410 aging separately. At the single gene level, we did not observe significant age-related heterogeneity  
411 change in most of the datasets, possibly due to insufficient statistical power due to small sample sizes  
412 and the subtle nature of the phenomenon. We hence took advantage of a meta-analysis approach  
413 and focused on consistent signals among datasets, irrespective of their effect sizes and significance.  
414 Although this approach fails to capture patterns that are specific to individual brain regions, it identifies  
415 genes that would otherwise not pass the significance threshold due to insufficient power.  
416 Furthermore, we demonstrated that our method is robust to noise and confounding effects within  
417 individual datasets.

418

### 419 ***Increase in gene expression heterogeneity during aging***

420 By analyzing age-related gene expression changes, we first observed that there are more significant  
421 and more similar changes during development than aging. Additionally, genes showing significant  
422 change during aging tended to decrease in expression (Figure 1). These results can be explained by  
423 the accumulation of stochastic detrimental effects during aging, leading to a decrease in expression  
424 levels (Lu et al., 2004). Our initial analysis of gene expression changes suggested a higher  
425 heterogeneity between aging datasets.

426

427 We next focused on age-related heterogeneity change between individuals and found a significant  
428 increase in age-related heterogeneity during aging, compared to development. Notably, increased  
429 heterogeneity is not limited to individual brain regions, but a consistent pattern across different  
430 regions during aging. We found that age-related heterogeneity change is more consistent among  
431 aging datasets, which may reflect an underlying systemic mechanism. Further, a larger number of

432 genes showed more significant heterogeneity changes during aging than in development, and the  
433 majority of these genes tended to have more heterogeneous expression.

434

435 It was previously proposed that somatic mutation accumulations (Lodato et al., 2018; Lombard et al.,  
436 2005; Lu et al., 2004; Vijg, 2004) and epigenetic regulations (Cheung et al., 2018) might be  
437 associated with transcriptome instability. While Enge et al. and Lodato et al. suggested that genome-  
438 wide substitutions in single cells are not so common as to influence genome stability and cause  
439 transcriptional heterogeneity at the cellular level (Enge et al., 2017; Lodato et al., 2015), epigenetic  
440 mechanisms may be relevant. Although we cannot test age-related somatic mutation accumulation  
441 and epigenetic regulation in this study, an alternative mechanism might be related to transcriptional  
442 regulation, which is considered to be inherently stochastic (Maheshri & O'Shea, 2007). Several  
443 studies demonstrated that variation in gene expression is positively correlated with the number of TFs  
444 controlling gene's regulation (Barroso et al., 2018). We also found that genes with a higher number of  
445 regulators and a decrease in expression during aging become more heterogeneous. Further,  
446 significantly enriched TFs include early growth response (*EGF*), known to be regulating the  
447 expression of many genes involved in synaptic homeostasis and plasticity, and *FOXO* TFs, which  
448 regulate stress resistance, metabolism, cell cycle arrest and apoptosis. Together with these studies,  
449 our results support that transcriptional regulation may be associated with age-related heterogeneity  
450 increase during aging and may have important functional consequences in brain aging.

451

#### 452 ***Increased heterogeneity is not a result of technical or statistical artifacts***

453 We next confirmed that observed increase in heterogeneity was not a result of low statistical power  
454 (Figure S1) or a technical artifact (Figure 3b, S24, S25). Specifically, we tested whether increased  
455 heterogeneity during aging can be a result of the mean-variance relationship, but we found no  
456 significant effect that can confound our results. In fact, the mean-variance relationship in development  
457 and aging showed opposing profiles. We further analyzed this by grouping genes based on their  
458 expression in development and aging (Figure S24). The genes that decrease in expression both in  
459 development and aging showed the most opposing profiles in terms of the mean-variance  
460 relationship, which could suggest that the decrease in development are more coordinated and well-  
461 regulated whereas the decrease in aging occurs due to stochastic errors. Another potential  
462 confounder is the post-mortem interval (PMI), which is the time between death and sample collection.  
463 Since we do not have this data for all datasets we analyzed, we could not account for PMI in our  
464 model. However, using the list of genes previously suggested as associated with PMI (Zhu, Wang,  
465 Yin, & Yang, 2017), we checked if the consistency among aging datasets could be driven by PMI.  
466 Only 2 PMI-associated genes were among the 147 that become consistently heterogeneous, and the  
467 distribution also suggested there is no significant relationship (Figure S25). We also confirmed that  
468 the increase in heterogeneity is not caused by outlier samples in datasets (Figure S26) or by the  
469 confound of sex with age (Figure S27).

470

471 ***Microarrays do not bias against identifying age-related heterogeneity change***

472 One important limitation of our study is that we analyze microarray-based data. Since gene  
473 expression levels measured by microarray do not reflect an absolute abundance of mRNAs, but  
474 rather are relative expression levels, we were only able to examine relative changes in gene  
475 expression. A recent study analyzing single-cell RNA sequencing data from the aging *Drosophila*  
476 brain identified an age-related decline in total mRNA abundance (Davie et al., 2018). It is also  
477 suggested that, in microarray studies, genes with lower expression levels tend to have higher  
478 variance (Aris et al., 2004). In this context, whether the change in heterogeneity is a result of the total  
479 mRNA decay is an important question. As an attempt to see if the age-related increase in  
480 heterogeneity is dependent on the technology used to generate data, we repeated the initial analysis  
481 using RNA sequencing data for the human brain, generated by GTEx Consortium (Ardlie et al., 2015)  
482 (Figure S28-30). Nine out of thirteen datasets displayed more increase than decrease in  
483 heterogeneity during aging, consistent with 18/19 microarray datasets, while the remaining four  
484 datasets showed the opposite pattern (BA24, cerebellar hemisphere, cerebellum and substantia  
485 nigra). Unlike what we observed for the microarray datasets, the change in expression levels and  
486 heterogeneity were strongly positively correlated (Figure S30). Unfortunately, average expression  
487 levels and variation levels in RNA sequencing is challenging to disentangle. Thus, the biological  
488 relevance of the relationship between the age-related change in expression levels and expression  
489 heterogeneity still awaits to be studied through novel experimental and computational approaches.  
490 Nevertheless, RNA sequencing analysis also suggests an overall increase in age-related  
491 heterogeneity increase.

492

493 Another limitation is related to use of bulk RNA expression datasets, where each value is an average  
494 for the tissue. While it is important to note that our results indicate increased heterogeneity between  
495 individuals rather than cells, the fact that the brain is composed of different cell types raises the  
496 question if increased heterogeneity may be a result of changes in brain cell-type proportions. To  
497 explore the association between heterogeneity and cell-type specific genes, we used FACS-sorted  
498 cell type specific transcriptome dataset from mouse brain (Cahoy et al., 2008). We only had nine  
499 genes that have consistent heterogeneity increase and are specific to one cell-type. Eight out of nine  
500 were highly expressed in oligodendrocytes, which is consistent with the results reported in our earlier  
501 work (Kedlian et al., 2019). However, we did not observe any significant association between cell-type  
502 specific genes and heterogeneity (Figure S23).

503

504 ***Biological processes are associated with increased heterogeneity***

505 Gene set enrichment analysis of the genes with increased heterogeneity with age revealed a set of  
506 significantly enriched pathways that are known to modulate aging, including longevity regulating  
507 pathway, autophagy, mTOR signaling pathway (Figure 5a). Furthermore, GO terms shared among  
508 these genes include some previously identified common pathways in aging and age-related diseases  
509 (Figure S16-18). We have also tested if these genes are associated with age-related diseases



510 through GWAS, and although not significant, we found a positive association with all age-related traits  
511 defined in Johnson and Dong et al.. Overall, these results indicate the effect of heterogeneity on  
512 pathways that modulate aging and may reflect the significance of increased heterogeneity in aging.  
513 Importantly, we identified genes that are enriched in terms related to neuronal and synaptic functions,  
514 such as axon guidance, neuron to neuron synapse, postsynaptic specialization, which may reflect the  
515 role of increased heterogeneity in synaptic dysfunction observed in the mammalian brain, which is  
516 considered to be a major factor in age-related cognitive decline (Morrison & Baxter, 2012). We also  
517 observed genes that become more heterogeneous with age consistently across datasets are more  
518 central (*i.e.* have a higher number of interactions) in a protein-protein interaction network (Figure  
519 S22). Although this could mean the effect of heterogeneity could be even more critical because it  
520 affects hub genes, another explanation is research bias that these genes are studied more than  
521 others.

522

523 In summary, by performing a meta-analysis of transcriptome data from diverse brain regions we found  
524 a significant increase in gene expression heterogeneity during aging, compared to development.  
525 Increased heterogeneity was a consistent pattern among diverse brain regions in aging, while no  
526 significant consistency was observed across development datasets. Our results support the view of  
527 aging as a result of stochastic molecular alterations, whilst development has a higher degree of gene  
528 expression regulation. We also found that genes showing a consistent increase in heterogeneity  
529 during aging are involved in pathways important for aging and neuronal function. Therefore, our  
530 results demonstrate that increased heterogeneity is one of the characteristics of brain aging and is  
531 unlikely to be only driven by the passage of time starting from developmental stages.

532

## 533 **Methods**

534

### 535 **Dataset collection**

536 Microarray datasets: Raw data used in this study were retrieved from the NCBI Gene Expression  
537 Omnibus (GEO) from three different sources (Table S1). All three datasets consist of human brain  
538 gene expression data generated on microarray platforms. In total, we obtained 1017 samples from  
539 298 individuals, spanning the whole lifespan with ages ranging from 0 to 98 years (Figure S1).

540 RNA sequencing dataset: We used the transcriptome data generated by the GTEx Consortium (v6p)  
541 (Ardlie et al., 2015). We only used the samples with a death circumstance of 1 (violent and fast  
542 deaths due to an accident) and 2 (fast death of natural causes) on the Hardy Scale excluding  
543 individuals who died of illnesses. As we focus only on the brain, we used all 13 brain tissue data in  
544 GTEx. We thus analyzed 623 samples obtained from 99 individuals.

545 Separating datasets into development and aging datasets: To differentiate changes in gene  
546 expression heterogeneity during aging from those during development, we used the age of 20 to  
547 separate pre-adulthood from adulthood. It was shown that the age of 20 corresponds to the first age

548 of reproduction in human societies (Walker et al., 2006). Structural changes after the age of 20 in the  
549 human brain were previously linked to age-related phenotypes, specifically neuronal shrinkage and a  
550 decline in total length of myelinated fibers (Sowell et al., 2004). Earlier studies examining age-related  
551 gene expression changes in different brain regions also showed a global change in gene expression  
552 patterns after the age of 20 (Colantuoni et al., 2011; Dönertaş et al., 2017; Somel et al., 2010). Thus,  
553 consistent with these studies, we separated datasets using the age of 20 into development (0 to 20  
554 years of age,  $n = 441$ ) and aging (20 to 98 years of age,  $n = 569$ ).

555

## 556 **Preprocessing**

557 Microarray datasets: RMA correction (using the 'oligo' library in R) (Carvalho & Irizarry, 2010) and  
558 log2 transformation were applied to Somel2011 and Kang2011 datasets. For the Colantuoni2011  
559 dataset, as there was no public R package to analyze the raw data, we used the preprocessed data  
560 deposited in GEO, which had been loess normalized by the authors. We quantile normalized all  
561 datasets using the 'preprocessCore' library in R (Bolstad, 2019). Notably, our analysis focused on  
562 consistent patterns across datasets, instead of considering significant changes within individual  
563 datasets. Since we don't expect random confounding factors to be shared among datasets, we used  
564 quantile normalization to minimize the effects of confounders, and we treated consistent results as  
565 potentially a biological signal. We also applied an additional correction procedure for Somel2011  
566 datasets, in which there was a batch effect influencing the expression levels, as follows: for each  
567 probeset (1) calculate mean expression (M), (2) scale each batch separately (to mean = 0, standard  
568 deviation = 1), (3) add M to each value. We excluded outliers given in Table S1, through a visual  
569 inspection of the first two principal components for the probeset expression levels (same as in  
570 Dönertaş, Fuentealba Valenzuela, Partridge, & Thornton, 2018; Dönertaş et al., 2017). We mapped  
571 probeset IDs to Ensembl gene IDs 1) using the Ensembl database, through the 'biomaRt' library  
572 (Durinck, Spellman, Birney, & Huber, 2009) in R for the Somel2011 dataset, 2) using the GPL file  
573 deposited in GEO for Kang2011, as probeset IDs for this dataset were not complete in Ensembl, and  
574 3) using the Entrez gene IDs in the GPL file deposited in GEO for the Colantuoni2011 dataset and  
575 converting them into Ensembl gene IDs using the Ensemble database, through the "biomaRt" library  
576 in R. Lastly, we scaled expression levels for genes (to mean = 0, standard deviation = 1) using the  
577 'scale' function in R. Age values of individuals in each dataset were converted to the fourth root of age  
578 (in days) to have a linear relationship between age and expression both in development and aging.  
579 However, we repeated the analysis using different age scales and confirmed that the results were  
580 quantitatively similar (Figure S3).

581 RNA sequencing dataset: The genes with median RPKM value of 0 were excluded from the dataset.  
582 The RPKM values provided in the GTEx data were log2 transformed and quantile-normalized. Similar  
583 to the microarray data, we excluded the outliers based on the visual inspection of the first and second  
584 principal components (Table S1). In GTEx, ages are given as 10 year intervals. We therefore used  
585 the middle point of these age intervals to represent that individual's age.

586

587

### 588 **Age-related expression change**

589 We used linear regression to assess the relationship between age and gene expression. The model  
590 used in the analysis is:

591

592

$$(1) Y_i = \beta_{i0} + \beta_{i1} * Age^{1/4} + \varepsilon_i$$

593

594 where  $Y_i$  is the scaled log2 expression level for the  $i^{\text{th}}$  gene,  $\beta_{i0}$  is the intercept,  $\beta_{i1}$  is the slope, and  $\varepsilon_i$   
595 is the residual. We performed the analysis for each dataset (development and aging datasets  
596 separately) and considered the  $\beta_i$  value as a measure of change in expression.  $p$ -values obtained  
597 from the model were corrected for multiple testing according to Benjamini and Hochberg procedure  
598 (Benjamini & Hochberg, 1995) by using 'p.adjust' function in R.

599

### 600 **Age-related heterogeneity change**

601 In order to quantify the age-related change in gene expression heterogeneity, we calculated  
602 Spearman's correlation coefficient ( $\rho$ ). The correlations were calculated between the absolute values  
603 of residuals obtained from equation (1) and the fourth root of individual age. We regarded the  
604 absolute values of residuals as a measure of heterogeneity. Therefore, high positive correlation  
605 coefficients suggest that heterogeneity increases with age, whereas strong negative correlation  
606 implies heterogeneity decreases with age.  $p$ -values were calculated from the correlation analysis and  
607 corrected for multiple testing with the Benjamini and Hochberg method using the 'p.adjust' function in  
608 R. To compare heterogeneity changes in aging and development, we employed paired Wilcoxon test  
609 ('wilcox.test' in the R 'stats' package) in which we compared median heterogeneity changes in aging  
610 and development dataset pairs.

611

### 612 **Principal Component Analysis**

613 We conducted principal component analysis on both age-related changes in expression ( $\beta$ ) and  
614 heterogeneity ( $\rho$ ). We followed a similar procedure for both analyses, in which we used the 'prcomp'  
615 function in R. The analysis was performed on a matrix containing  $\beta$  values (for the change in  
616 expression level) and  $\rho$  values (for the change in heterogeneity), for 11,137 commonly expressed  
617 genes for all 38 development and aging datasets. In each dataset, the estimates of expression  
618 change ( $\beta$ ) or heterogeneity change ( $\rho$ ) values were scaled for each dataset before calculating  
619 principal components.

620

### 621 **Permutation test**

622 We performed a permutation test, taking into account the non-independence of samples across the  
623 Somel2011 and Kang2011 datasets, due to the fact that these datasets include multiple samples from  
624 the same individuals for different brain regions. We first randomly permuted ages among individuals,

625 not samples, for 1,000 times in each data source, using the 'sample' function in R. Next, we assigned  
626 ages of individuals to corresponding samples and calculated age-related expression and  
627 heterogeneity change for each dataset, corresponding to different brain regions. For the tests related  
628 to the changes in gene expression with age, we used a linear model between gene expression levels  
629 and the randomized ages. In contrast, for the tests related to the changes in heterogeneity with age,  
630 we measured the correlation between the randomized ages and the absolute value of residuals from  
631 the linear model that is between expression levels and non-randomized ages for each gene. In this  
632 way, we preserved the relationship between age and expression, and we were able to ensure that our  
633 regression model was viable for calculating age-related heterogeneity change. Using expression and  
634 heterogeneity change estimates calculated using permuted ages, we tested (a) if the correlation of  
635 expression (and heterogeneity) change in aging is higher than in development datasets; (b) if the  
636 correlations of expression (and heterogeneity) change in development and in aging datasets are  
637 significantly higher than null expectation; (c) if the number of genes showing significant change in  
638 expression (and heterogeneity) is significantly higher in aging than in development datasets; (d) if the  
639 overall increase in age-related heterogeneity during aging is significantly higher than development; (e)  
640 if the observed consistency in heterogeneity increase is significantly different from expected. We also  
641 demonstrate that our permutation strategy is more stringent than random permutations in Figure S10,  
642 giving the distributions calculated using both dependent permutations and random permutations.

643

644 To test the overall correlation within development or aging datasets for the changes in expression ( $\beta$ )  
645 and heterogeneity ( $\rho$ ), we calculated median correlations among independent three subsets of  
646 datasets (one Kang2011, one Somel2011 and the Colantuoni2011 dataset), taking the median value  
647 calculated for each possible combination of independent subsets ( $16 \times 2 \times 1 = 32$  combinations).  
648 Using 1,000 permutations of individuals' ages, we generated an expected distribution for the median  
649 correlation coefficient for triples and compared these with the observed values, asking how many  
650 times we observe a higher value. We used this approach to calculate expected median correlation  
651 among development (and aging) datasets, because the number of independent pairwise comparisons  
652 are outnumbered by the number of dependent pairwise comparisons, causing low statistical power.

653

654 To further test the significance of the difference between correlations among development and aging  
655 datasets, we calculated the median difference in correlations between aging and development  
656 datasets for each permutation. We next constructed the null distribution of 1,000 median differences  
657 and calculated empirical  $p$ -values comparing the observed differences with these null distributions.  
658 Next, to test the significance of the difference in the number of significantly changing genes between  
659 development and aging, we calculated the difference in the number of genes showing significant  
660 change between development and aging datasets for each permutation. Empirical  $p$ -values were  
661 computed according to observed differences. Likewise, to test if the overall increase in age-related  
662 heterogeneity during aging is significant compared to development, we computed median differences  
663 between median heterogeneity change values of each aging and development dataset, for each

664 permutation, followed by an empirical  $p$ -value calculation to answer if the aging datasets have a  
665 higher increase in age-related heterogeneity.

666

### 667 **Expected heterogeneity consistency**

668 Expected consistency in heterogeneity change was calculated from heterogeneity change values  
669 ( $\rho$ ) measured using permuted ages. For each permutation, we first calculated the total number of  
670 genes showing consistent heterogeneity increase for  $N$  number of datasets ( $N = 0, \dots, 19$ ). To test if  
671 observed consistency significantly differed from the expected, we compared observed consistency  
672 values to the distribution of expected numbers, by performing a one-sided test for the consistency in  
673  $N$  number of datasets,  $N = 1, \dots, 19$ .

674

### 675 **Clustering**

676 We used the k-means algorithm ('kmeans' function in R) to cluster genes showing consistent  
677 heterogeneity change ( $n=147$ ) according to their heterogeneity profiles. We first took the subset of the  
678 heterogeneity levels (absolute value of the residuals from equation [1]) to include only the genes that  
679 show a consistent increase with age and then scaled the heterogeneity levels to the same mean and  
680 standard deviation. Since the number of samples in each dataset is different, just running k-means on  
681 the combined dataset would not equally represent all datasets. Thus, we first calculated the spline  
682 curves for scaled heterogeneity levels for each gene in each dataset (using the 'smooth.spline'  
683 function in R, with three degrees of freedom). We interpolated at 11 (the smallest sample size) equally  
684 distant age points within each dataset. Then we used the combined interpolated values to run the k-  
685 means algorithm with  $k = 8$ , a liberal choice, given the total number of genes being 147.

686

687 To test association of the clusters with Alzheimer's Disease, we retrieved overall AD association  
688 scores of the 147 consistent genes ( $n = 40$ ) from the Open Targets Platform (Carvalho-Silva et al.,  
689 2019).

690

### 691 **Functional Analysis**

692 We used the "clusterProfiler" package in R to run Gene Set Enrichment Analysis, using Gene  
693 Ontology (GO) Biological Process (BP), GO Molecular Function (MF), GO Cellular Compartment  
694 (CC), Reactome, Disease Ontology (DO), and KEGG Pathways. We performed GSEA on all gene  
695 sets with a size between 5 and 500, and we corrected the resulting  $p$ -values with the Benjamini and  
696 Hochberg correction method. To test if the genes with a consistent increase or decrease in their  
697 expression are associated with specific functions, we used the number of datasets with a consistent  
698 increase to run GSEA. Since we are running GSEA using number of datasets showing consistency,  
699 our data includes many ties, potentially making the ranking ambiguous and non-robust. In order to  
700 assess how robust our results are, we ran GSEA 1,000 times on the same data and counted how  
701 many times we observed the same set of KEGG pathways as significant (Table S4). The lowest  
702 number among the pathways with a significant positive enrichment score was 962 out of 1,000

703 (Phospholipase D signaling pathway). Moreover, we repeated the same analysis using the  
704 heterogeneity change levels ( $\rho$ ), instead of using the number of datasets with a consistent change, for  
705 each dataset to confirm the gene sets are indeed associated with the increase or decrease in  
706 heterogeneity (Figure S15-S19). We visualized the KEGG pathways using 'KEGGgraph' library in R  
707 and colored the genes by the number of datasets that show an increase.

708

709 We also performed an enrichment analysis of the transcription factors and miRNA to test if specific  
710 TFs or miRNAs regulate the genes that become more heterogeneous consistently. We collected  
711 gene-regulator association information using the Harmonizome database (Rouillard et al., 2016),  
712 "MiRTarBase microRNA Targets" (12086 genes, 596 miRNAs) and "TRANSFAC Curated  
713 Transcription Factor Targets" (13216 genes, 201 TFs) sets. We used the 'fgsea' package in R, which  
714 allows GSEA on a custom gene set. We tested the association for each regulator with at least 10 and  
715 at most 500 targets. Moreover, we tested if the number of regulators is associated with the change in  
716 heterogeneity. We first calculated the correlation between heterogeneity change with age (or the  
717 number of datasets with an increase in expression heterogeneity) and the number of TFs or miRNAs  
718 regulating that gene, for aging and development separately. We repeated the analysis while  
719 accounting for the direction of expression changes in these periods (*i.e.* separating genes into down-  
720 down, down-up, up-down, and up-up categories based on their expression in development and aging,  
721 Figure S21). To test the difference in the correlations between aging and development, we used  
722 1,000 random permutations of the number of TFs. For each permutation, we randomized the number  
723 of TFs and calculated the correlation between heterogeneity change (or the number of datasets with  
724 an increase in heterogeneity) and the randomized numbers. We then calculated the percentage of  
725 datasets where aging has a higher correlation than development. Using the distribution of  
726 percentages, we tested if the observed value is expected by chance.

727

### 728 **Protein-protein interaction network analysis**

729 We downloaded all human protein interaction data from the STRING database (v11) (von Mering et  
730 al., 2005). Ensembl Peptide IDs are mapped to Ensembl Gene IDs using the "biomaRt" package in R.  
731 Here we aimed to test whether genes showing consistent increase in heterogeneity have a different  
732 number of interactors than other genes. For this we calculated the degree distributions for the genes  
733 that become consistently more heterogeneous with age and all remaining genes using different  
734 cutoffs for interaction confidence scores. In order to calculate the significance of the difference, we i)  
735 calculated the number of interactors (degree) for each gene, ii) for 10,000 times, randomly sampled k  
736 genes from all interactome data (k = number of genes that become heterogeneous with age across all  
737 datasets and have interaction information in STRING database, after filtering for a cutoff), iii)  
738 calculated the median of degree for each sample. We then calculated an empirical  $p$ -value by asking  
739 how many of these 10,000 samples we see a median degree that is equivalent to or higher than our  
740 original value. The number of genes and interactions after each cutoff are given in Figure S22.

741

## 742 **Cell-type specificity analysis**

743 Using FACS-sorted cell-type specific transcriptome data from the mouse brain (Cahoy et al., 2008),  
744 we checked if there is any overlap between genes that become heterogeneous with age and cell-type  
745 specific genes. We downloaded the dataset from the GEO database (GSE9566) and preprocessed it  
746 by performing: i) RMA correction using the ‘affy’ package in R (Gautier, Cope, Bolstad, & Irizarry,  
747 2004), ii) log<sub>2</sub> transformation, iii) quantile normalization using the ‘preprocessCore’ package in R  
748 (Bolstad, 2019), iv) mapping probeset IDs to first mouse genes, and then human genes. We only  
749 included genes that have one to one orthologs in humans, after filtering out probesets that map to  
750 multiple genes. We defined cell-type specific genes by calculating the effect size (Cohen’s D) for each  
751 gene and cell type and identifying genes that have an effect size higher than or equal to 2 as specific  
752 to that cell type. At this cutoff, there was no overlap between cell type specific gene lists. To test for  
753 association between heterogeneity and cell type specificity, we used the Fisher’s exact test using the  
754 R ‘fisher.test’ function.

755

## 756 **Software**

757 All analysis was performed using R and the code to calculate heterogeneity changes with age is  
758 available as an R package ‘hetAge’, documented at <https://mdonertas.github.io/hetAge/>. “ggplot2”  
759 (Wickham, 2017) and “ggpubr” (Kassambara, 2018) R libraries were used for the visualization.

760

## 761 **Data availability**

762 Raw data used in this study was downloaded from the GEO database using GSE numbers specified  
763 in Table S1. All data generated in this study, *i.e.* changes in expression and heterogeneity with age  
764 for each dataset and functional enrichment results are available as Supplementary Tables.

765

## 766 **Author Contributions**

767 H.M.D. conceived and designed the study with the contributions from M.S., and J.M.T.. U.I. and  
768 H.M.D. analyzed the data. U.I. and H.M.D. interpreted the results and wrote the manuscript with the  
769 contributions from M.S. and J.M.T. All authors read, revised and approved the final version of this  
770 manuscript.

771

## 772 **Acknowledgements**

773 The authors thank Hamit Izgi, Matias Fuentealba Valenzuela, Dr. Daniel K. Fabian, and Prof Linda  
774 Partridge for helpful discussions. H.M.D. is a member of Darwin College, University of Cambridge.

775

## 776 **Funding Statement**

777 This work is funded by EMBL (H.M.D., J.M.T.) and the Wellcome Trust (098565/Z/12/Z; J.M.T.).

778

## 779 **References**

- 780 Angelidis, I., Simon, L. M., Fernandez, I. E., Strunz, M., Mayr, C. H., Greiffo, F. R., ... Schiller, H. B.  
781 (2019). An atlas of the aging lung mapped by single cell transcriptomics and deep tissue  
782 proteomics. *Nature Communications*, *10*(1), 963. <https://doi.org/10.1038/s41467-019-08831-9>
- 783 Ardlie, K. G., Deluca, D. S., Segre, A. V., Sullivan, T. J., Young, T. R., Gelfand, E. T., ... Dermitzakis,  
784 E. T. (2015). The Genotype-Tissue Expression (GTEx) pilot analysis: Multitissue gene regulation  
785 in humans. *Science*, *348*(6235), 648–660. <https://doi.org/10.1126/science.1262110>
- 786 Aris, V. M., Cody, M. J., Cheng, J., Dermody, J. J., Soteropoulos, P., Recce, M., & Tolia, P. P.  
787 (2004). Noise filtering and nonparametric analysis of microarray data underscores discriminating  
788 markers of oral, prostate, lung, ovarian and breast cancer. *BMC Bioinformatics*, *5*.  
789 <https://doi.org/10.1186/1471-2105-5-185>
- 790 Ashburner, M., Ball, C. A., Blake, J. A., Botstein, D., Butler, H., Cherry, J. M., ... Sherlock, G. (2000,  
791 May). Gene ontology: Tool for the unification of biology. *Nature Genetics*. Nature America Inc.  
792 <https://doi.org/10.1038/75556>
- 793 Bahar, R., Hartmann, C. H., Rodriguez, K. A., Denny, A. D., Busuttill, R. A., Dollé, M. E. T., ... Vijg, J.  
794 (2006). Increased cell-to-cell variation in gene expression in ageing mouse heart. *Nature*,  
795 *441*(7096), 1011–1014. <https://doi.org/10.1038/nature04844>
- 796 Barroso, G. V., Puzovic, N., & Dutheil, J. Y. (2018). The Evolution of Gene-Specific Transcriptional  
797 Noise Is Driven by Selection at the Pathway Level. *Genetics*, *208*(1), 173–189.  
798 <https://doi.org/10.1534/genetics.117.300467>
- 799 Benjamini, Y., & Hochberg, Y. (1995). Controlling the False Discovery Rate: A Practical and Powerful  
800 Approach to Multiple Testing. *Journal of the Royal Statistical Society. Series B (Methodological)*.  
801 WileyRoyal Statistical Society. Retrieved from <https://www.jstor.org/stable/2346101>
- 802 Bolstad, B. M. (2019). preprocessCore: A collection of pre-processing functions. Retrieved from  
803 <https://github.com/bmbolstad/preprocessCore>
- 804 Brinkmeyer-Langford, C. L., Guan, J., Ji, G., & Cai, J. J. (2016). Aging Shapes the Population-Mean  
805 and -Dispersion of Gene Expression in Human Brains. *Frontiers in Aging Neuroscience*, *8*, 183.  
806 <https://doi.org/10.3389/fnagi.2016.00183>
- 807 Cahoy, J. D., Emery, B., Kaushal, A., Foo, L. C., Zamanian, J. L., Christopherson, K. S., ... Barres, B.  
808 A. (2008). A transcriptome database for astrocytes, neurons, and oligodendrocytes: a new  
809 resource for understanding brain development and function. *The Journal of Neuroscience*: *The*  
810 *Official Journal of the Society for Neuroscience*, *28*(1), 264–278.  
811 <https://doi.org/10.1523/JNEUROSCI.4178-07.2008>
- 812 Carvalho-Silva, D., Pierleoni, A., Pignatelli, M., Ong, C., Fumis, L., Karamanis, N., ... Dunham, I.  
813 (2019). Open Targets Platform: new developments and updates two years on. *Nucleic Acids*  
814 *Research*, *47*(D1), D1056–D1065. <https://doi.org/10.1093/nar/gky1133>
- 815 Carvalho, B. S., & Irizarry, R. A. (2010). A framework for oligonucleotide microarray preprocessing.  
816 *Bioinformatics*, *26*(19), 2363–2367. <https://doi.org/10.1093/bioinformatics/btq431>



- 817 Cheung, P., Vallania, F., Warsinske, H. C., Donato, M., Schaffert, S., Chang, S. E., ... Kuo, A. J.  
818 (2018). Single-Cell Chromatin Modification Profiling Reveals Increased Epigenetic Variations  
819 with Aging. *Cell*, 173(6), 1385-1397.e14. <https://doi.org/10.1016/j.cell.2018.03.079>
- 820 Chou, C.-H., Chang, N.-W., Shrestha, S., Hsu, S.-D., Lin, Y.-L., Lee, W.-H., ... Huang, H.-D. (2016).  
821 miRTarBase 2016: updates to the experimentally validated miRNA-target interactions database.  
822 *Nucleic Acids Research*, 44(D1), D239–D247. <https://doi.org/10.1093/nar/gkv1258>
- 823 Colantuoni, C., Lipska, B. K., Ye, T., Hyde, T. M., Tao, R., Leek, J. T., ... Kleinman, J. E. (2011).  
824 Temporal dynamics and genetic control of transcription in the human prefrontal cortex. *Nature*,  
825 478(7370), 519–523. <https://doi.org/10.1038/nature10524>
- 826 Davie, K., Janssens, J., Koldere, D., De Waegeneer, M., Pech, U., Kreft, Ł., ... Aerts, S. (2018). A  
827 Single-Cell Transcriptome Atlas of the Aging Drosophila Brain. *Cell*, 174(4), 982-998.e20.  
828 <https://doi.org/10.1016/j.cell.2018.05.057>
- 829 Dönertaş, H. M., Fuentealba Valenzuela, M., Partridge, L., & Thornton, J. M. (2018). Gene  
830 expression-based drug repurposing to target aging. *Aging Cell*, 17(5), e12819.  
831 <https://doi.org/10.1111/ace1.12819>
- 832 Dönertaş, H. M., İzgi, H., Kamacıoğlu, A., He, Z., Khaitovich, P., & Somel, M. (2017). Gene  
833 expression reversal toward pre-adult levels in the aging human brain and age-related loss of  
834 cellular identity. *Scientific Reports*, 7(1), 5894. <https://doi.org/10.1038/s41598-017-05927-4>
- 835 Dorszewska, J. (2013). Cell biology of normal brain aging: synaptic plasticity–cell death. *Aging*  
836 *Clinical and Experimental Research*, 25(1), 25–34. <https://doi.org/10.1007/s40520-013-0004-2>
- 837 Durinck, S., Spellman, P. T., Birney, E., & Huber, W. (2009). Mapping identifiers for the integration of  
838 genomic datasets with the R/Bioconductor package biomaRt. *Nature Protocols*, 4(8), 1184–  
839 1191. <https://doi.org/10.1038/nprot.2009.97>
- 840 Enge, M., Arda, H. E., Mignardi, M., Beausang, J., Bottino, R., Kim, S. K., & Quake, S. R. (2017).  
841 Single-Cell Analysis of Human Pancreas Reveals Transcriptional Signatures of Aging and  
842 Somatic Mutation Patterns. *Cell*, 171(2), 321-330.e14. <https://doi.org/10.1016/j.cell.2017.09.004>
- 843 Evans, D. A., Funkenstein, H. H., Albert, M. S., Scherr, P. A., Cook, N. R., Chown, M. J., ... Taylor, J.  
844 O. (1989). Prevalence of Alzheimer's disease in a community population of older persons.  
845 Higher than previously reported. *JAMA*, 262(18), 2551–2556. Retrieved from  
846 <http://www.ncbi.nlm.nih.gov/pubmed/2810583>
- 847 Fabregat, A., Jupe, S., Matthews, L., Sidiropoulos, K., Gillespie, M., Garapati, P., ... D'Eustachio, P.  
848 (2018). The Reactome Pathway Knowledgebase. *Nucleic Acids Research*, 46(D1), D649–D655.  
849 <https://doi.org/10.1093/nar/gkx1132>
- 850 Fraga, M. F., Ballestar, E., Paz, M. F., Ropero, S., Setien, F., Ballestar, M. L., ... Esteller, M. (2005).  
851 Epigenetic differences arise during the lifetime of monozygotic twins. *Proceedings of the*  
852 *National Academy of Sciences*, 102(30), 10604–10609.  
853 <https://doi.org/10.1073/pnas.0500398102>
- 854 Gautier, L., Cope, L., Bolstad, B. M., & Irizarry, R. A. (2004). affy--analysis of Affymetrix GeneChip  
855 data at the probe level. *Bioinformatics*, 20(3), 307–315.

- 856 <https://doi.org/10.1093/bioinformatics/btg405>
- 857 Gorbunova, V., Seluanov, A., Mao, Z., & Hine, C. (2007). Changes in DNA repair during aging.
- 858 *Nucleic Acids Research*, 35(22), 7466–7474. <https://doi.org/10.1093/nar/gkm756>
- 859 Grillo, F. W., Song, S., Teles-Grilo Ruivo, L. M., Huang, L., Gao, G., Knott, G. W., ... De Paola, V.
- 860 (2013). Increased axonal bouton dynamics in the aging mouse cortex. *Proceedings of the*
- 861 *National Academy of Sciences*, 110(16), E1514–E1523.
- 862 <https://doi.org/10.1073/pnas.1218731110>
- 863 Herndon, L. A., Schmeissner, P. J., Dudaronek, J. M., Brown, P. A., Listner, K. M., Sakano, Y., ...
- 864 Driscoll, M. (2002). Stochastic and genetic factors influence tissue-specific decline in ageing *C.*
- 865 *elegans*. *Nature*, 419(6909), 808–814. <https://doi.org/10.1038/nature01135>
- 866 Johnson, S. C., Dong, X., Vijg, J., & Suh, Y. (2015). Genetic evidence for common pathways in
- 867 human age-related diseases. *Aging Cell*, 14(5), 809–817. <https://doi.org/10.1111/accel.12362>
- 868 Johnson, S. C., Rabinovitch, P. S., & Kaeberlein, M. (2013). mTOR is a key modulator of ageing and
- 869 age-related disease. *Nature*, 493(7432), 338–345. <https://doi.org/10.1038/nature11861>
- 870 Kanehisa, M., Sato, Y., Furumichi, M., Morishima, K., & Tanabe, M. (2019). New approach for
- 871 understanding genome variations in KEGG. *Nucleic Acids Research*, 47(D1), D590–D595.
- 872 <https://doi.org/10.1093/nar/gky962>
- 873 Kang, H. J., Kawasawa, Y. I., Cheng, F., Zhu, Y., Xu, X., Li, M., ... Sestan, N. (2011). Spatio-temporal
- 874 transcriptome of the human brain. *Nature*, 478(7370), 483–489.
- 875 <https://doi.org/10.1038/nature10523>
- 876 Kassambara, A. (2018). ggpubr: “ggplot2” Based Publication Ready Plots. *R Package Version 0.1.8*.
- 877 Retrieved from <https://cran.r-project.org/package=ggpubr>
- 878 Kedlian, V. R., Donertas, H. M., & Thornton, J. M. (2019). The widespread increase in inter-individual
- 879 variability of gene expression in the human brain with age. *Aging*, 11(8), 2253–2280.
- 880 <https://doi.org/10.18632/aging.101912>
- 881 Kibbe, W. A., Arze, C., Felix, V., Mitraka, E., Bolton, E., Fu, G., ... Schriml, L. M. (2015). Disease
- 882 Ontology 2015 update: an expanded and updated database of human diseases for linking
- 883 biomedical knowledge through disease data. *Nucleic Acids Research*, 43(D1), D1071–D1078.
- 884 <https://doi.org/10.1093/nar/gku1011>
- 885 Lodato, M. A., Rodin, R. E., Bohrsen, C. L., Coulter, M. E., Barton, A. R., Kwon, M., ... Walsh, C. A.
- 886 (2018). Aging and neurodegeneration are associated with increased mutations in single human
- 887 neurons. *Science*, 359(6375), 555–559. <https://doi.org/10.1126/science.aao4426>
- 888 Lodato, M. A., Woodworth, M. B., Lee, S., Evrony, G. D., Mehta, B. K., Karger, A., ... Walsh, C. A.
- 889 (2015). Somatic mutation in single human neurons tracks developmental and transcriptional
- 890 history. *Science*, 350(6256), 94–98. <https://doi.org/10.1126/science.aab1785>
- 891 Lombard, D. B., Chua, K. F., Mostoslavsky, R., Franco, S., Gostissa, M., & Alt, F. W. (2005). DNA
- 892 Repair, Genome Stability, and Aging. *Cell*, 120(4), 497–512.
- 893 <https://doi.org/10.1016/j.cell.2005.01.028>
- 894 Lu, T., Pan, Y., Kao, S.-Y., Li, C., Kohane, I., Chan, J., & Yankner, B. A. (2004). Gene regulation and

- 895 DNA damage in the ageing human brain. *Nature*, 429(6994), 883–891.  
896 <https://doi.org/10.1038/nature02661>
- 897 Maheshri, N., & O’Shea, E. K. (2007). Living with Noisy Genes: How Cells Function Reliably with  
898 Inherent Variability in Gene Expression. *Annual Review of Biophysics and Biomolecular*  
899 *Structure*, 36(1), 413–434. <https://doi.org/10.1146/annurev.biophys.36.040306.132705>
- 900 Martinez-Jimenez, C. P., Eling, N., Chen, H.-C., Vallejos, C. A., Kolodziejczyk, A. A., Connor, F., ...  
901 Odom, D. T. (2017). Aging increases cell-to-cell transcriptional variability upon immune  
902 stimulation. *Science*, 355(6332), 1433–1436. <https://doi.org/10.1126/science.aah4115>
- 903 Martins, R., Lithgow, G. J., & Link, W. (2016). Long live FOXO: unraveling the role of FOXO proteins  
904 in aging and longevity. *Aging Cell*, 15(2), 196–207. <https://doi.org/10.1111/acel.12427>
- 905 Matys, V., Fricke, E., Geffers, R., Gössling, E., Haubrock, M., Hehl, R., ... Wingender, E. (2003).  
906 TRANSFAC: transcriptional regulation, from patterns to profiles. *Nucleic Acids Research*, 31(1),  
907 374–378. <https://doi.org/10.1093/nar/gkg108>
- 908 Miller, J. A., Ding, S.-L., Sunkin, S. M., Smith, K. A., Ng, L., Szafer, A., ... Lein, E. S. (2014).  
909 Transcriptional landscape of the prenatal human brain. *Nature*, 508(7495), 199–206.  
910 <https://doi.org/10.1038/nature13185>
- 911 Morrison, J. H., & Baxter, M. G. (2012). The ageing cortical synapse: hallmarks and implications for  
912 cognitive decline. *Nature Reviews. Neuroscience*, 13(4), 240–250.  
913 <https://doi.org/10.1038/nrn3200>
- 914 Polleux, F., Ince-Dunn, G., & Ghosh, A. (2007). Transcriptional regulation of vertebrate axon guidance  
915 and synapse formation. *Nature Reviews Neuroscience*, 8(5), 331–340.  
916 <https://doi.org/10.1038/nrn2118>
- 917 Rouillard, A. D., Gundersen, G. W., Fernandez, N. F., Wang, Z., Monteiro, C. D., McDermott, M. G., &  
918 Ma’ayan, A. (2016). The harmonizome: a collection of processed datasets gathered to serve and  
919 mine knowledge about genes and proteins. *Database*, 2016, baw100.  
920 <https://doi.org/10.1093/database/baw100>
- 921 Rubinsztein, D. C., Mariño, G., & Kroemer, G. (2011). Autophagy and Aging. *Cell*, 146(5), 682–695.  
922 <https://doi.org/10.1016/j.cell.2011.07.030>
- 923 Schratt, G. (2009). microRNAs at the synapse. *Nature Reviews Neuroscience*, 10(12), 842–849.  
924 <https://doi.org/10.1038/nrn2763>
- 925 Somel, M., Guo, S., Fu, N., Yan, Z., Hu, H. Y., Xu, Y., ... Khaitovich, P. (2010). MicroRNA, mRNA,  
926 and protein expression link development and aging in human and macaque brain. *Genome*  
927 *Research*, 20(9), 1207–1218. <https://doi.org/10.1101/gr.106849.110>
- 928 Somel, M., Khaitovich, P., Bahn, S., Pääbo, S., & Lachmann, M. (2006). Gene expression becomes  
929 heterogeneous with age. *Current Biology*, 16(10), R359–R360.  
930 <https://doi.org/10.1016/j.cub.2006.04.024>
- 931 Sowell, E. R., Thompson, P. M., & Toga, A. W. (2004). Mapping Changes in the Human Cortex  
932 throughout the Span of Life. *The Neuroscientist*, 10(4), 372–392.  
933 <https://doi.org/10.1177/1073858404263960>

- 934 Stefani, G., & Slack, F. J. (2008). Small non-coding RNAs in animal development. *Nature Reviews*  
935 *Molecular Cell Biology*, 9(3), 219–230. <https://doi.org/10.1038/nrm2347>
- 936 Tacutu, R., Thornton, D., Johnson, E., Budovsky, A., Barardo, D., Craig, T., ... De Magalhães, J. P.  
937 (2018). Human Ageing Genomic Resources: New and updated databases. *Nucleic Acids*  
938 *Research*, 46(D1), D1083–D1090. <https://doi.org/10.1093/nar/gkx1042>
- 939 Tebbenkamp, A. T. N., Willsey, A. J., State, M. W., & Šestan, N. (2014). The developmental  
940 transcriptome of the human brain. *Current Opinion in Neurology*, 27(2), 149–156.  
941 <https://doi.org/10.1097/WCO.0000000000000069>
- 942 The Gene Ontology Consortium. (2019). The Gene Ontology Resource: 20 years and still GOing  
943 strong. *Nucleic Acids Research*, 47(D1), D330–D338. <https://doi.org/10.1093/nar/gky1055>
- 944 Vijg, J. (2004). Impact of genome instability on transcription regulation of aging and senescence.  
945 *Mechanisms of Ageing and Development*, 125(10–11), 747–753.  
946 <https://doi.org/10.1016/j.mad.2004.07.004>
- 947 Viñuela, A., Brown, A. A., Buil, A., Tsai, P.-C., Davies, M. N., Bell, J. T., ... Small, K. S. (2018). Age-  
948 dependent changes in mean and variance of gene expression across tissues in a twin cohort.  
949 *Human Molecular Genetics*, 27(4), 732–741. <https://doi.org/10.1093/hmg/ddx424>
- 950 von Mering, C., Jensen, L. J., Snel, B., Hooper, S. D., Krupp, M., Foglierini, M., ... Bork, P. (2005).  
951 STRING: known and predicted protein-protein associations, integrated and transferred across  
952 organisms. *Nucleic Acids Research*, 33(Database issue), D433-7.  
953 <https://doi.org/10.1093/nar/gki005>
- 954 Walker, R., Gurven, M., Hill, K., Migliano, A., Chagnon, N., De Souza, R., ... Yamauchi, T. (2006).  
955 Growth rates and life histories in twenty-two small-scale societies. *American Journal of Human*  
956 *Biology*, 18(3), 295–311. <https://doi.org/10.1002/ajhb.20510>
- 957 Wickham, H. (2017). ggplot2 – Elegant Graphics for Data Analysis. *Journal of Statistical Software*,  
958 77(April), 3–5. <https://doi.org/10.18637/jss.v077.b02>
- 959 Ximerakis, M., Lipnick, S. L., Simmons, S. K., Adiconis, X., Innes, B. T., Dionne, D., ... Rubin, L. L.  
960 (2018). Single-cell transcriptomics of the aged mouse brain reveals convergent, divergent and  
961 unique aging signatures. *BioRxiv*, 440032. <https://doi.org/10.1101/440032>
- 962 Zhu, Y., Wang, L., Yin, Y., & Yang, E. (2017). Systematic analysis of gene expression patterns  
963 associated with postmortem interval in human tissues. *Scientific Reports*, 7(1), 5435.  
964 <https://doi.org/10.1038/s41598-017-05882-0>
- 965

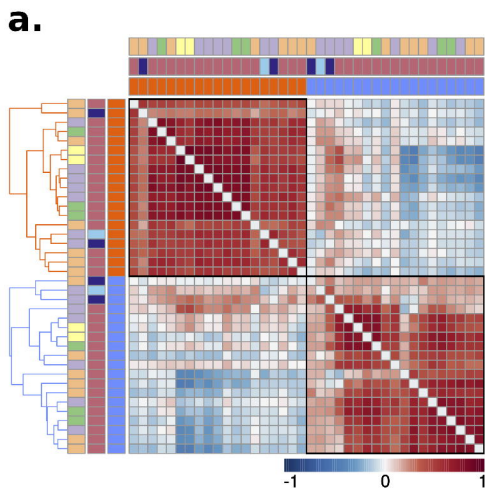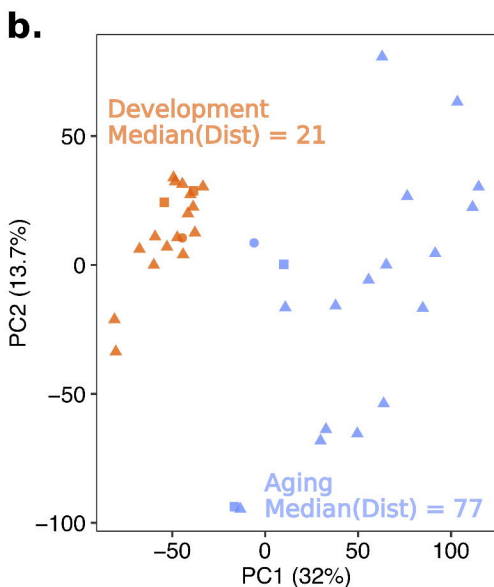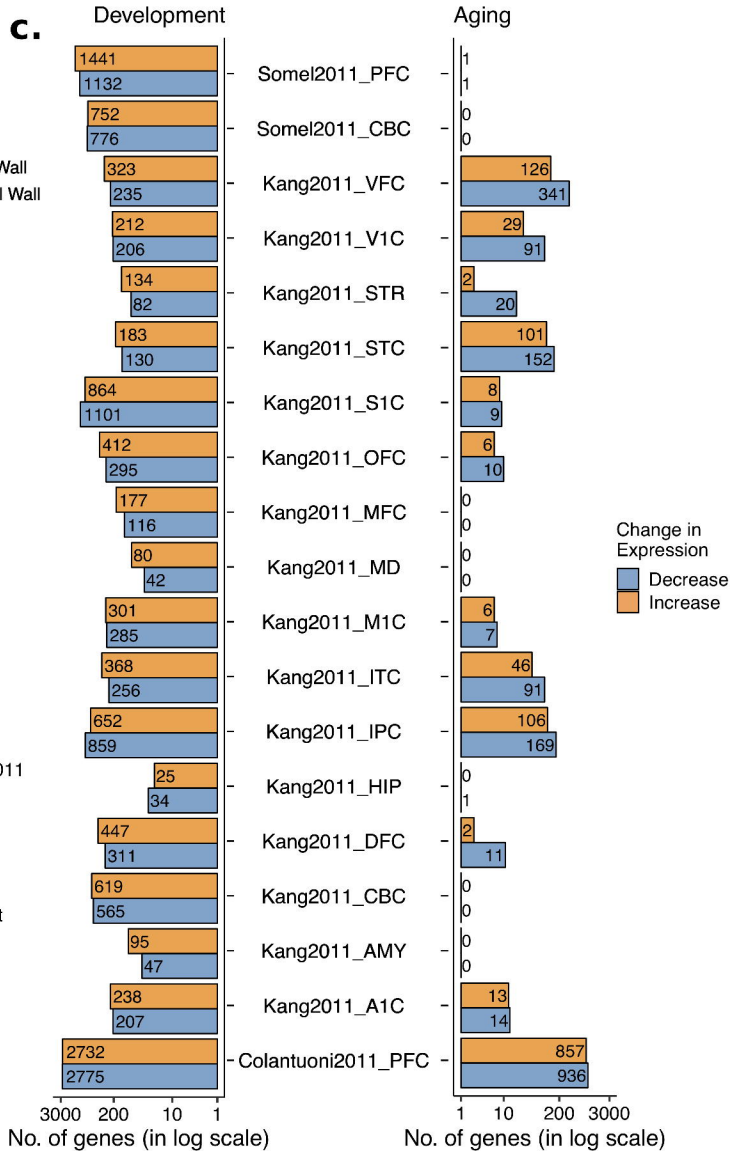

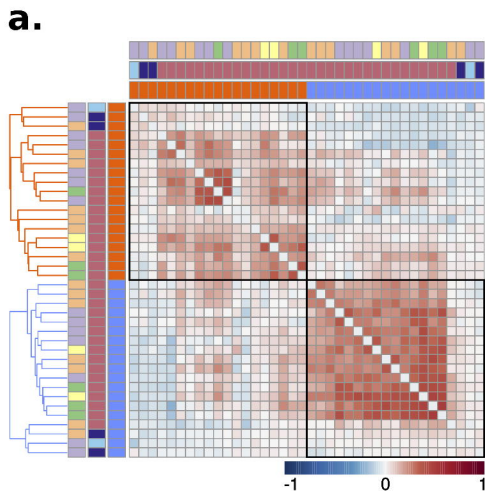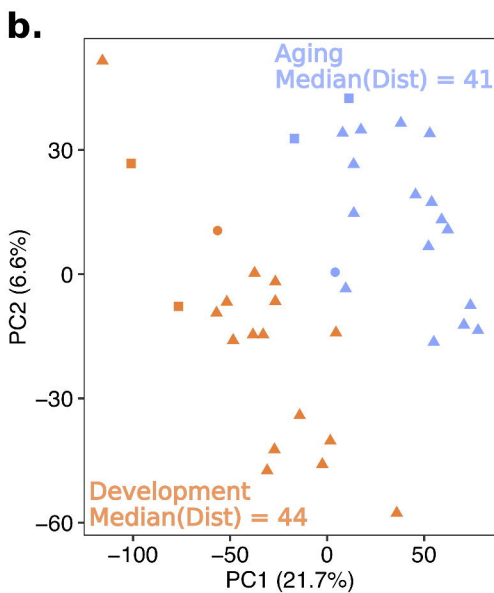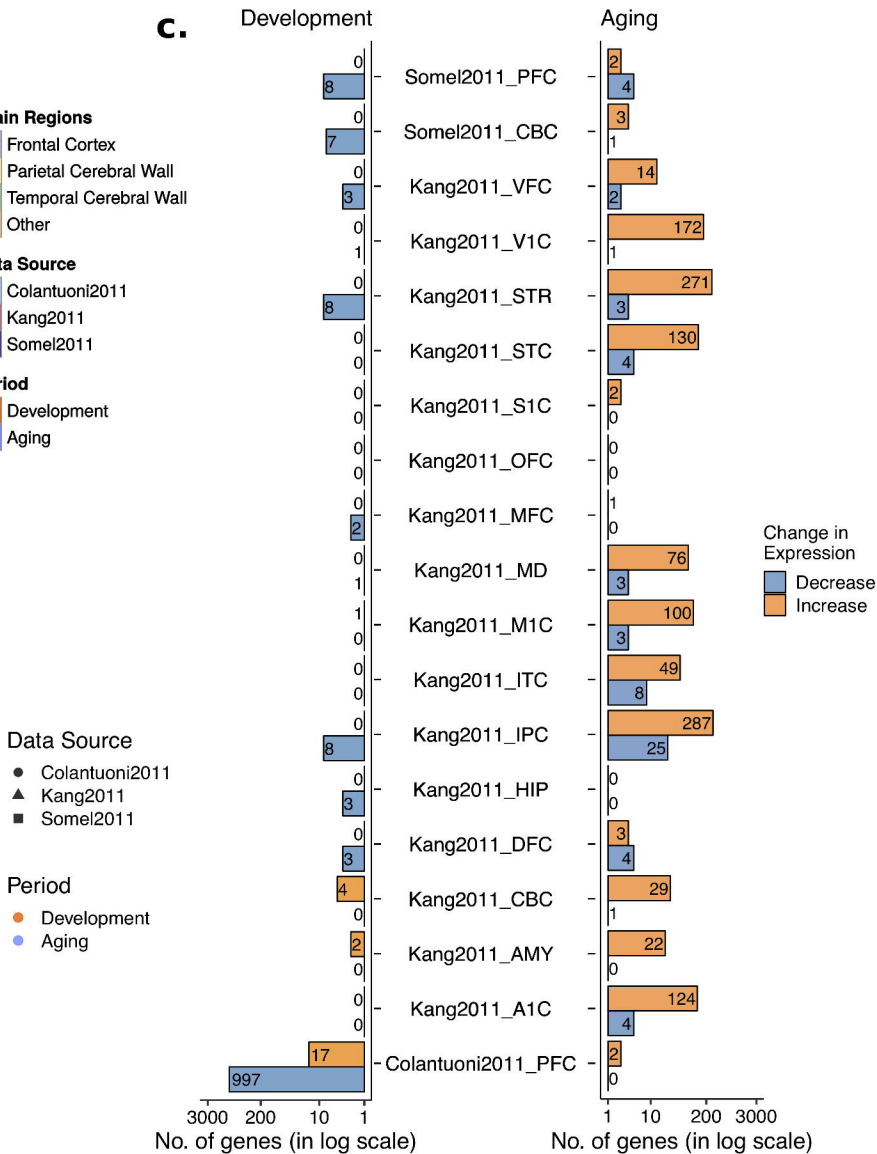

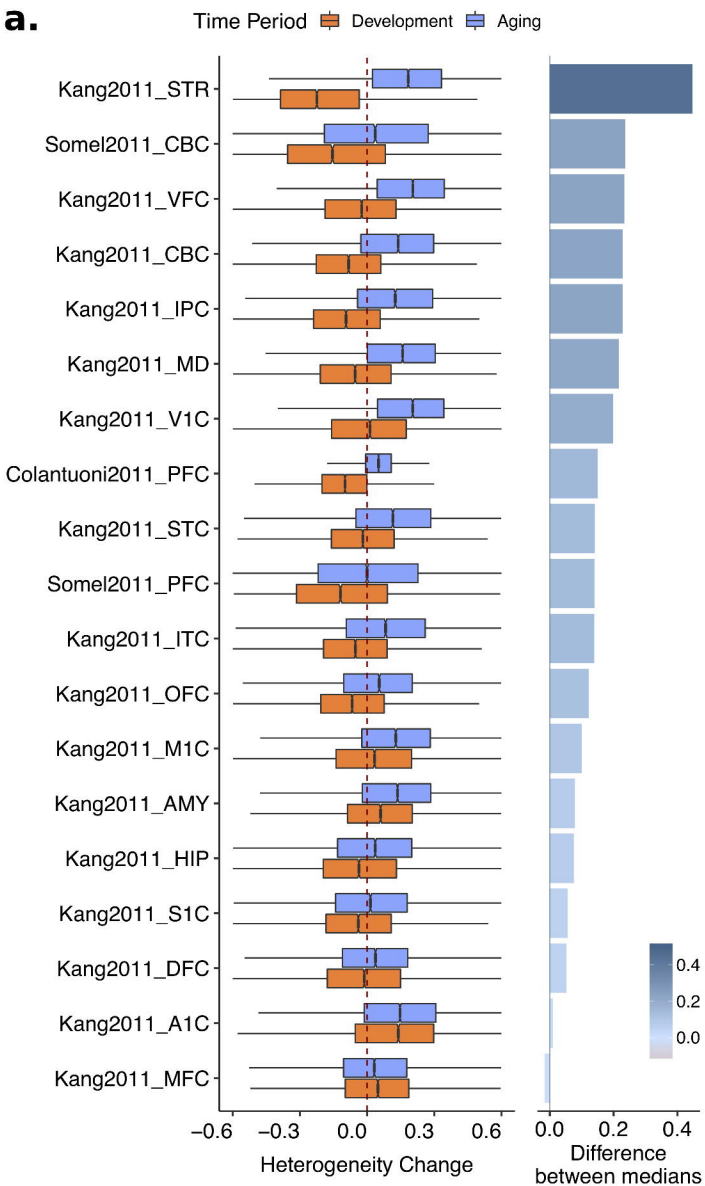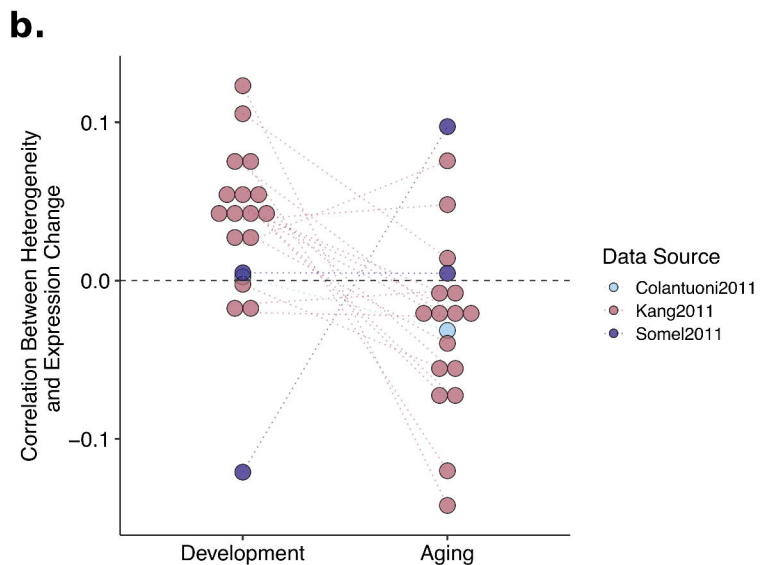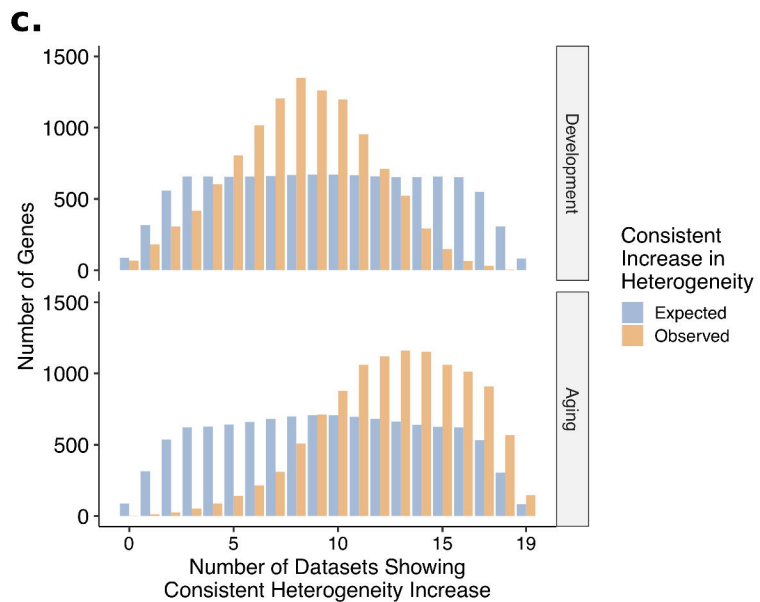





a.

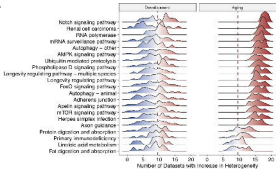

b.

## Longevity Regulating Pathway

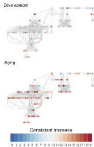

Source: https://www.biorxiv.org/content/10.1101/595249v3.full.pdf
