# Supplementary material for: Gene expression heterogeneity during brain development and aging: temporal changes and functional consequences
Source: bioRxiv or medRxiv preprint supplement (doi:10.1101/595249), 2019-11-23

# Development

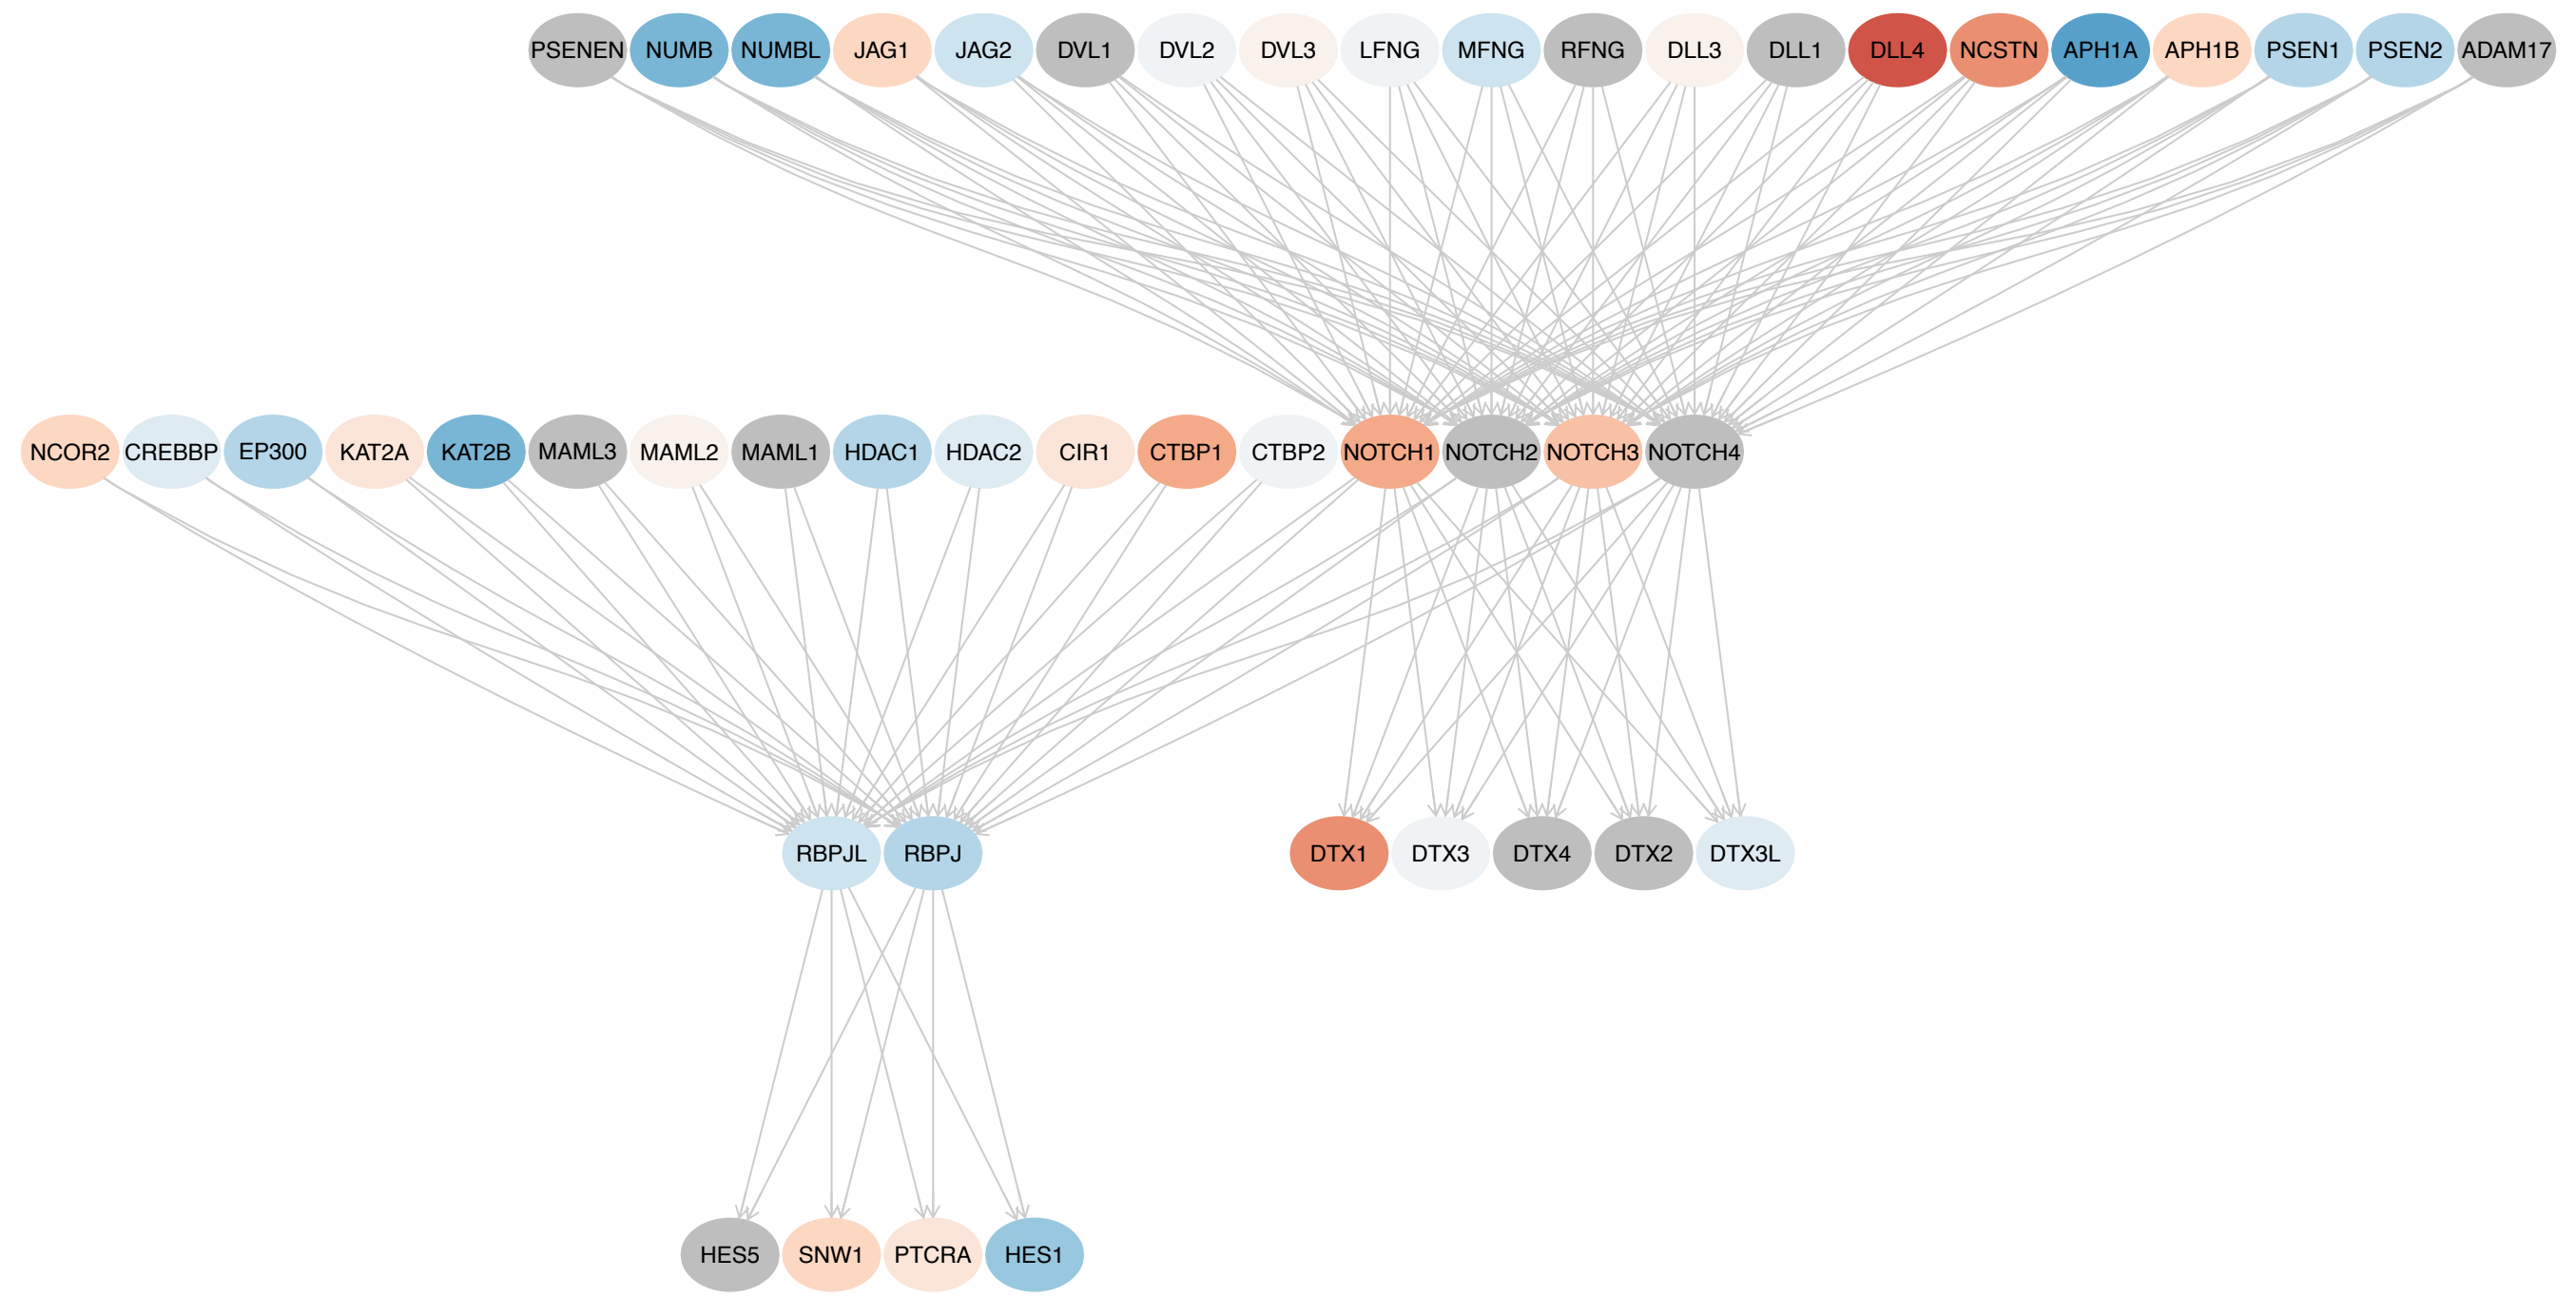

# Notch signaling pathway

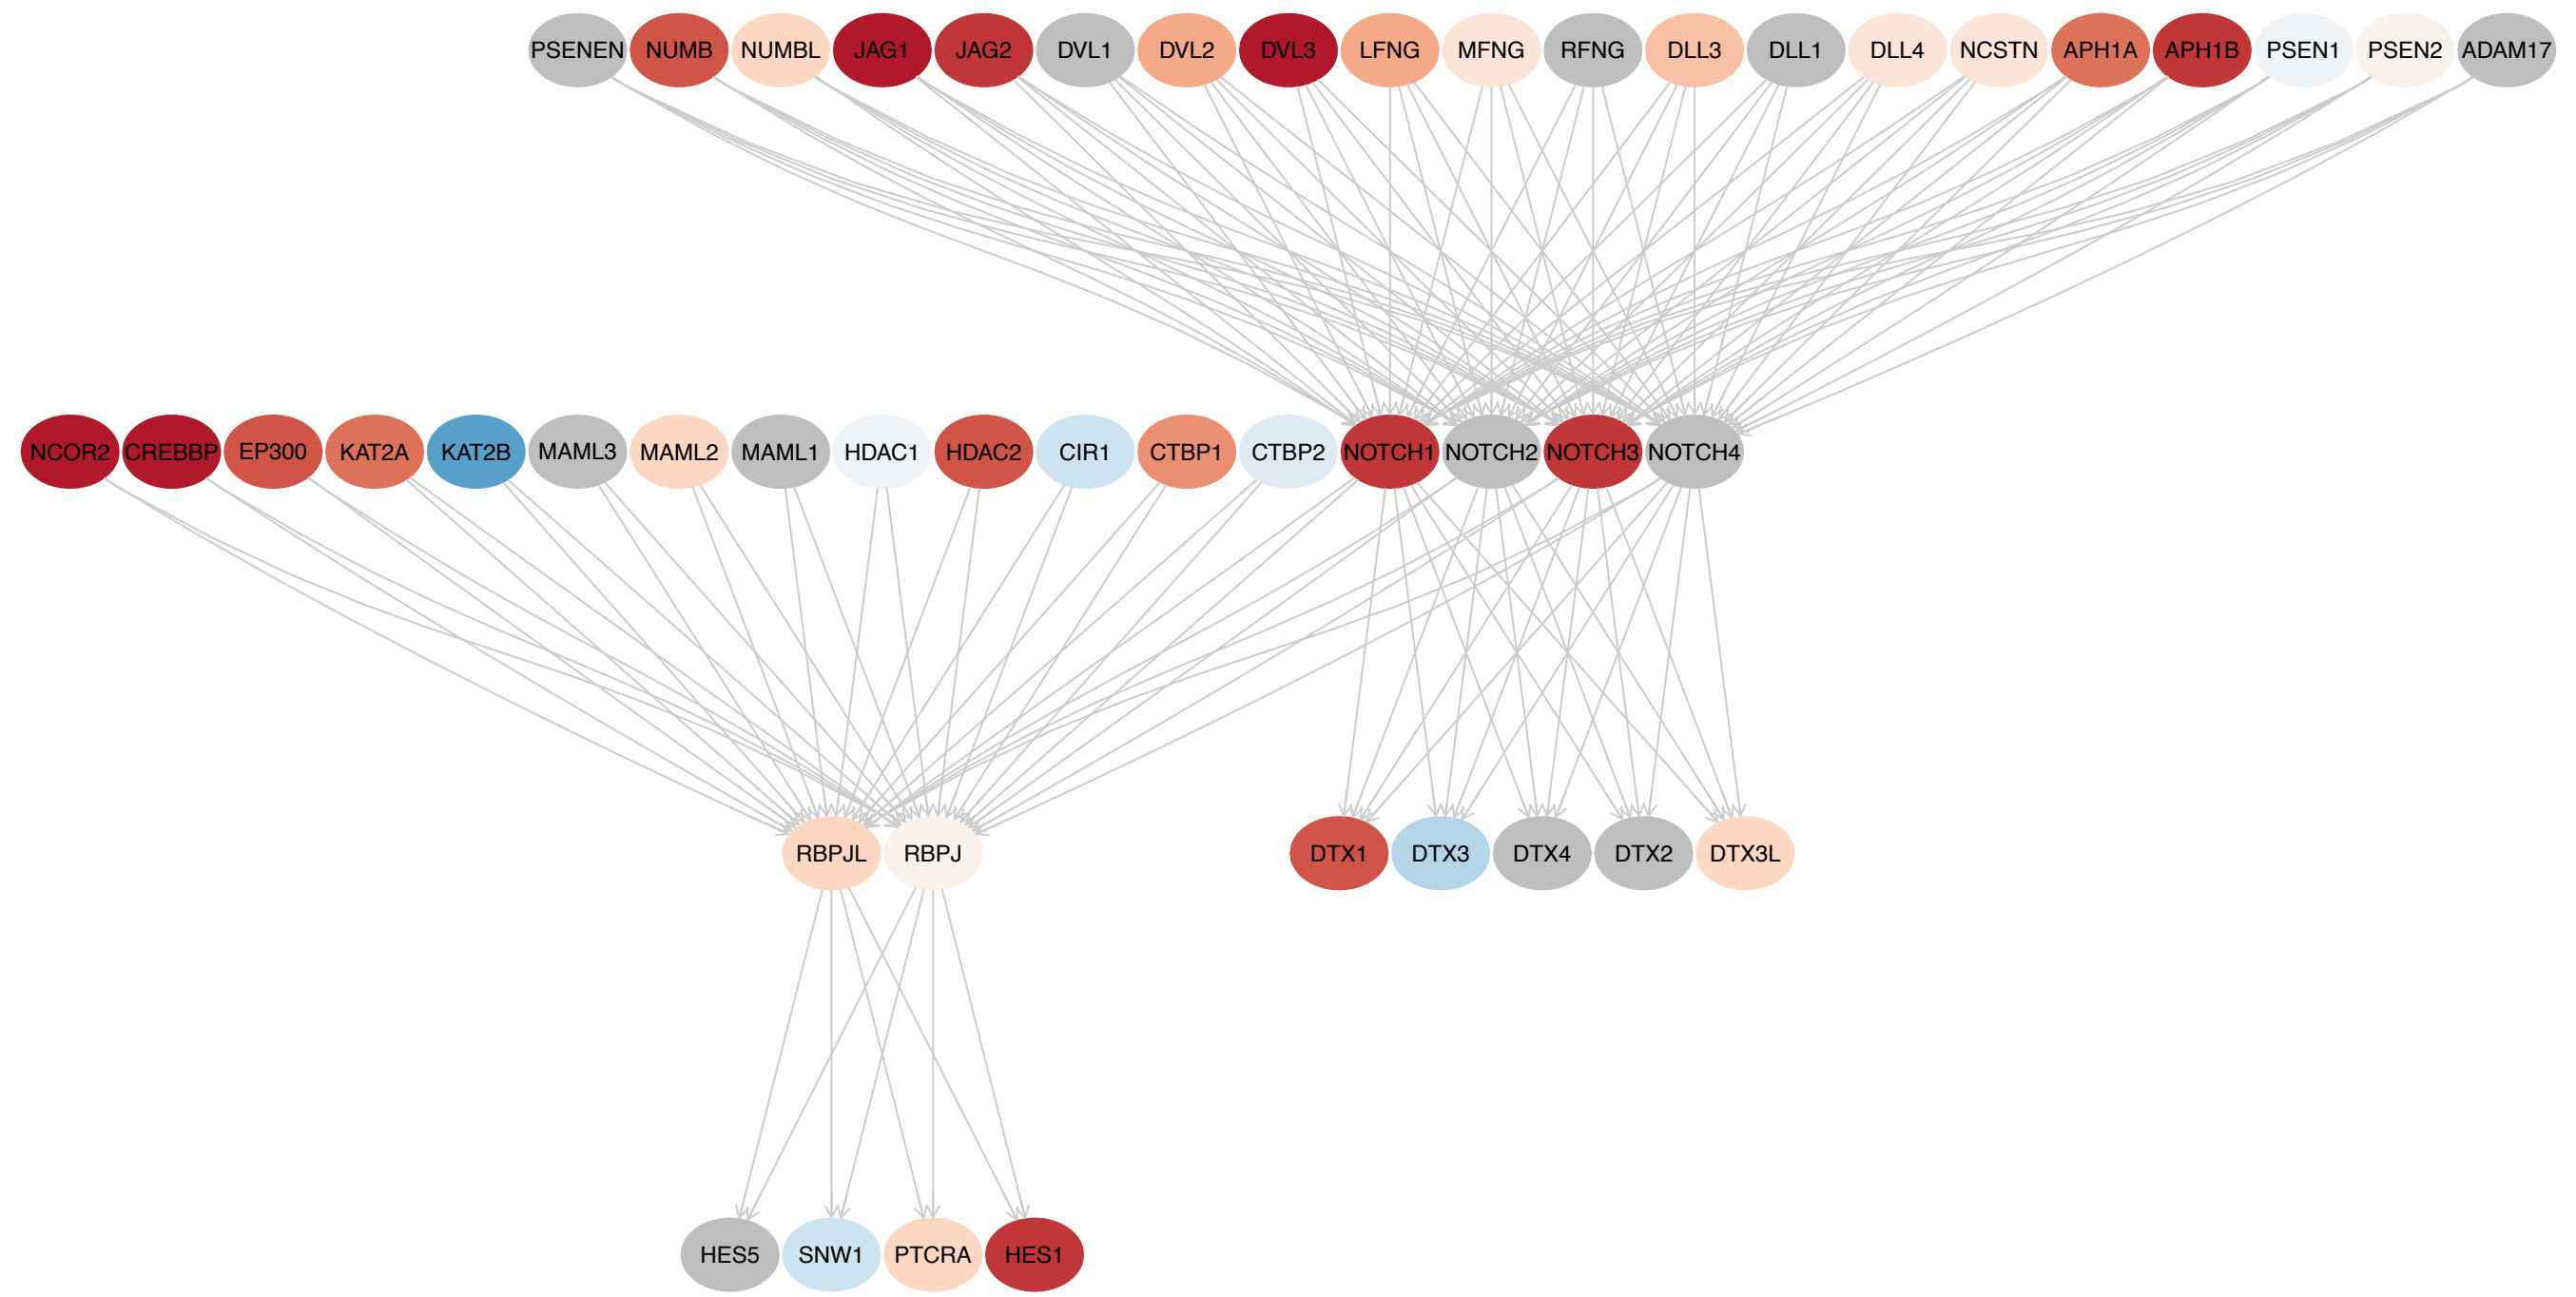

# Ageing



# Development

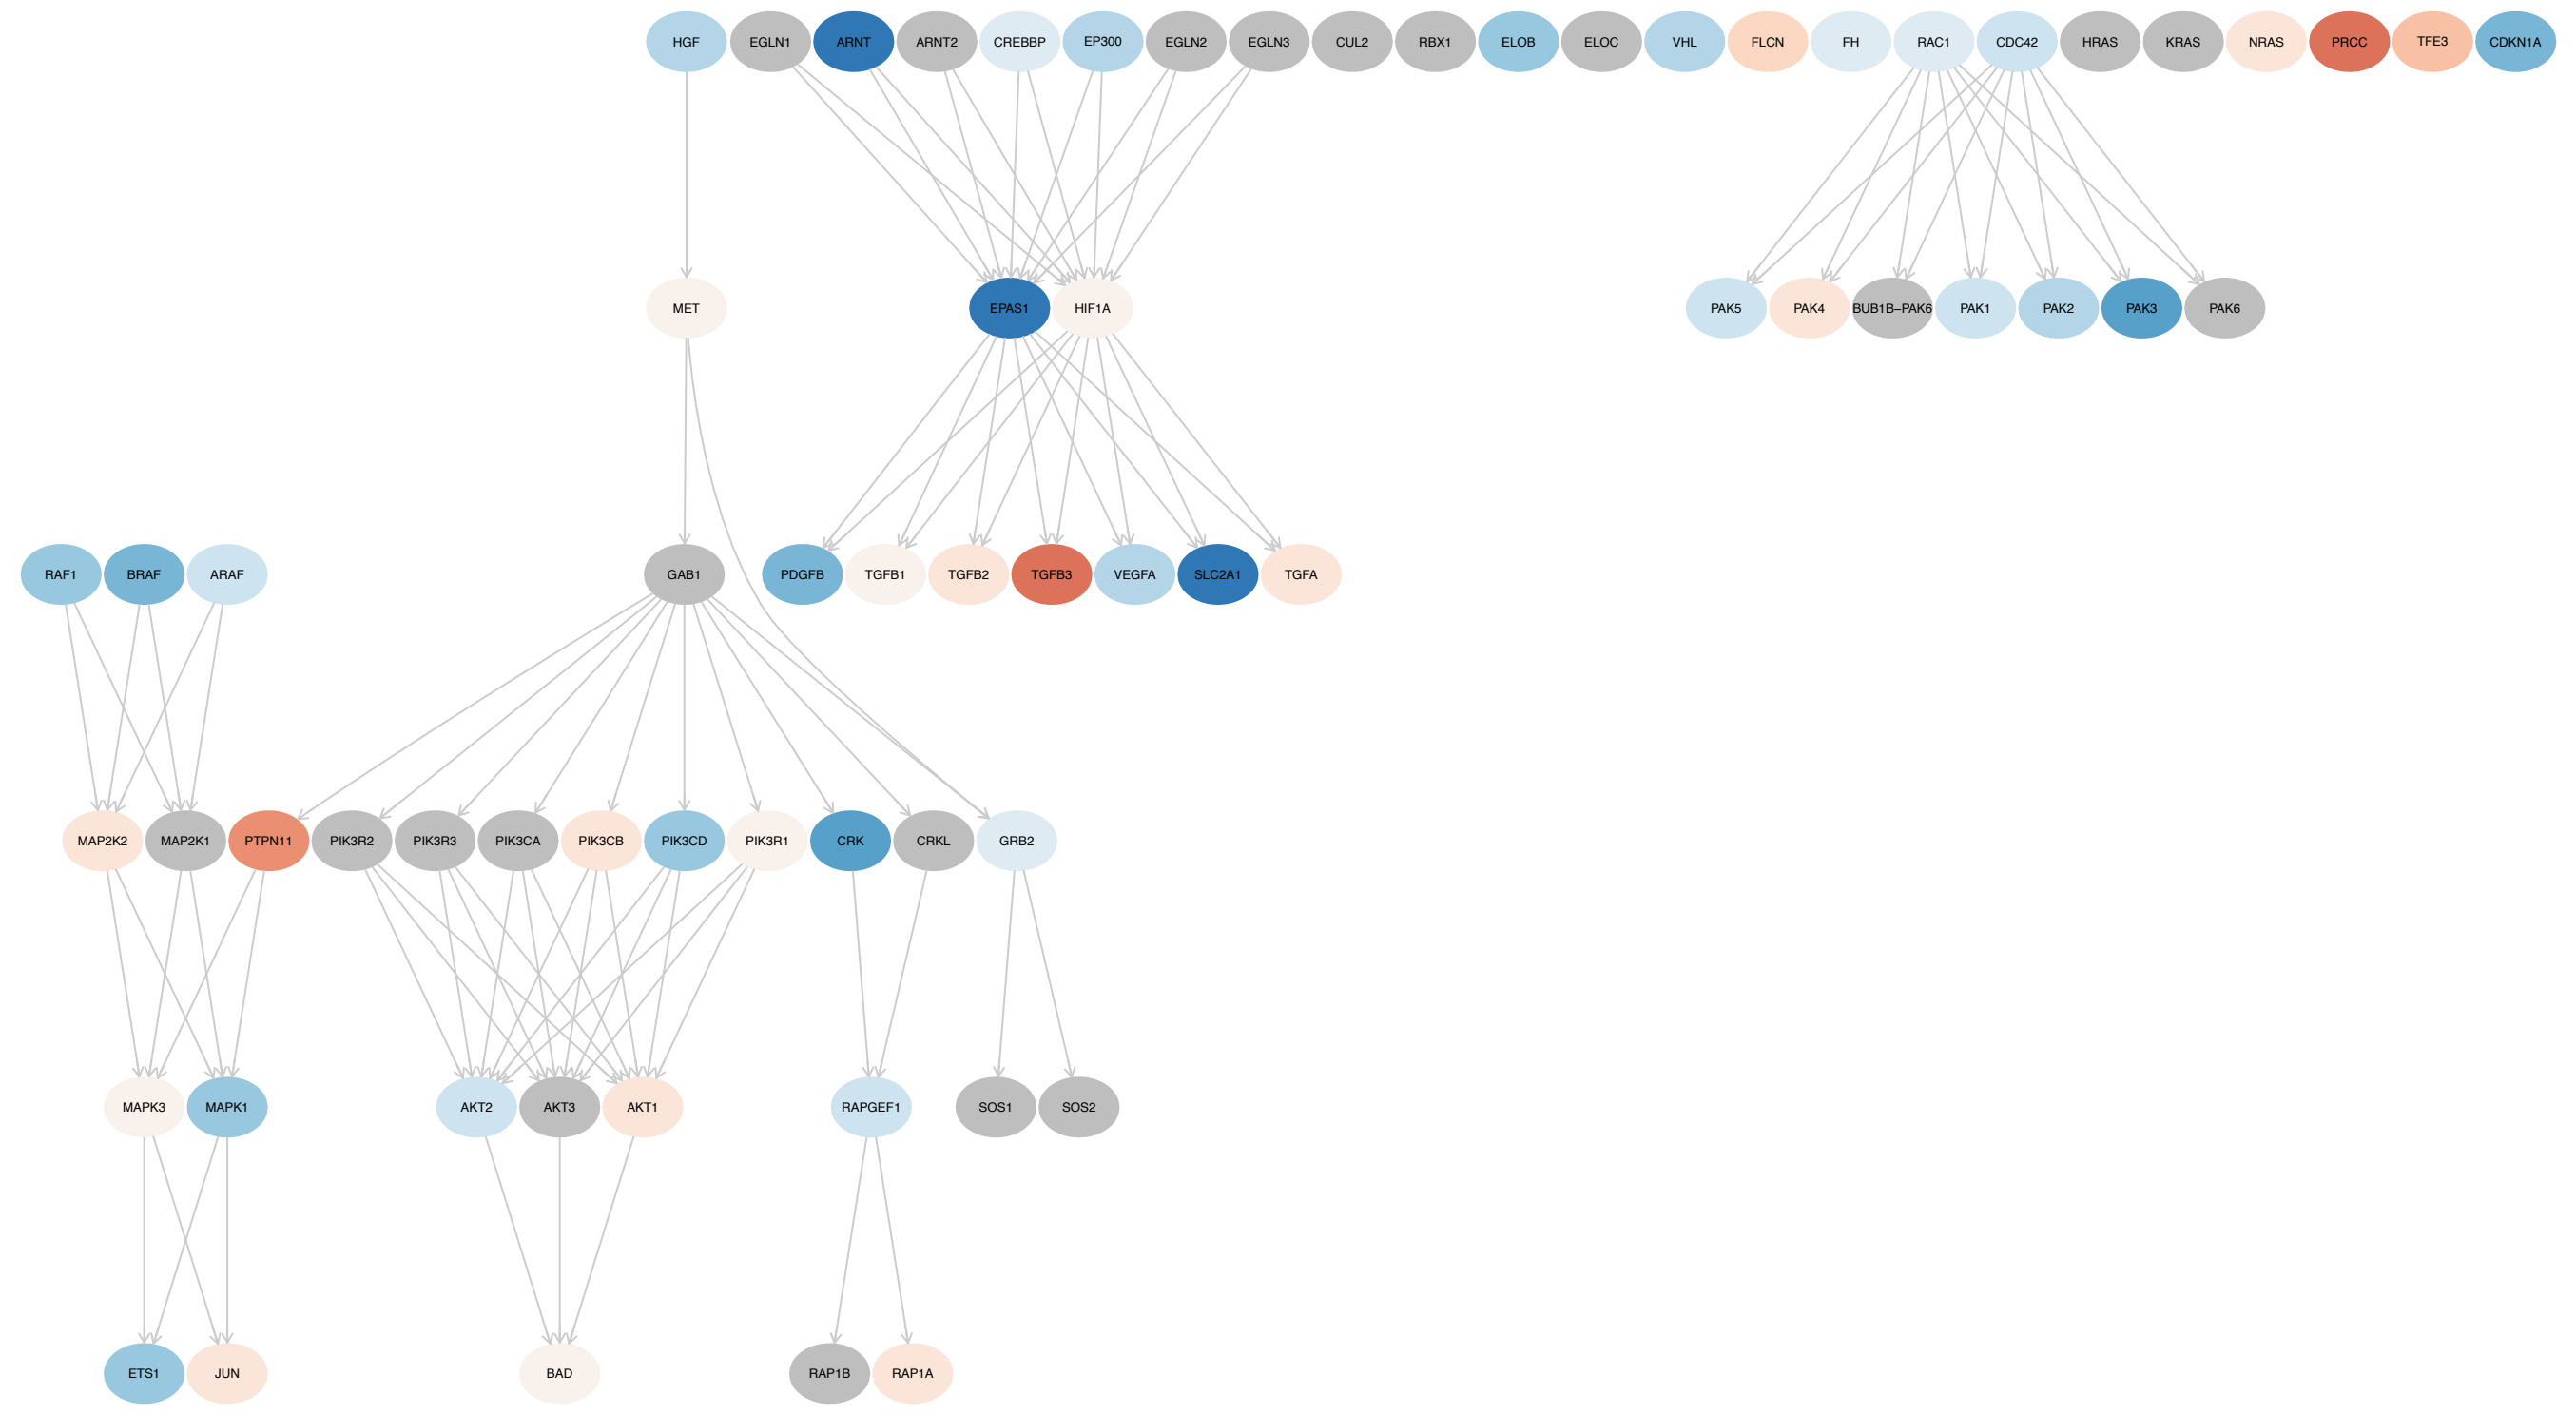

# Renal cell carcinoma

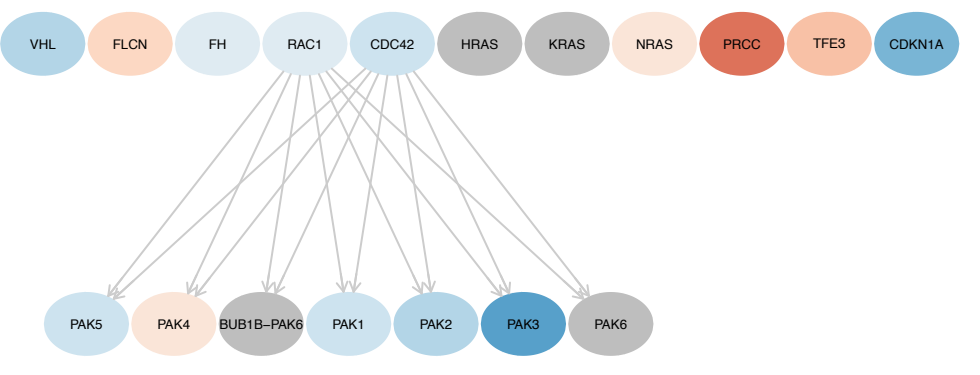

# Ageing

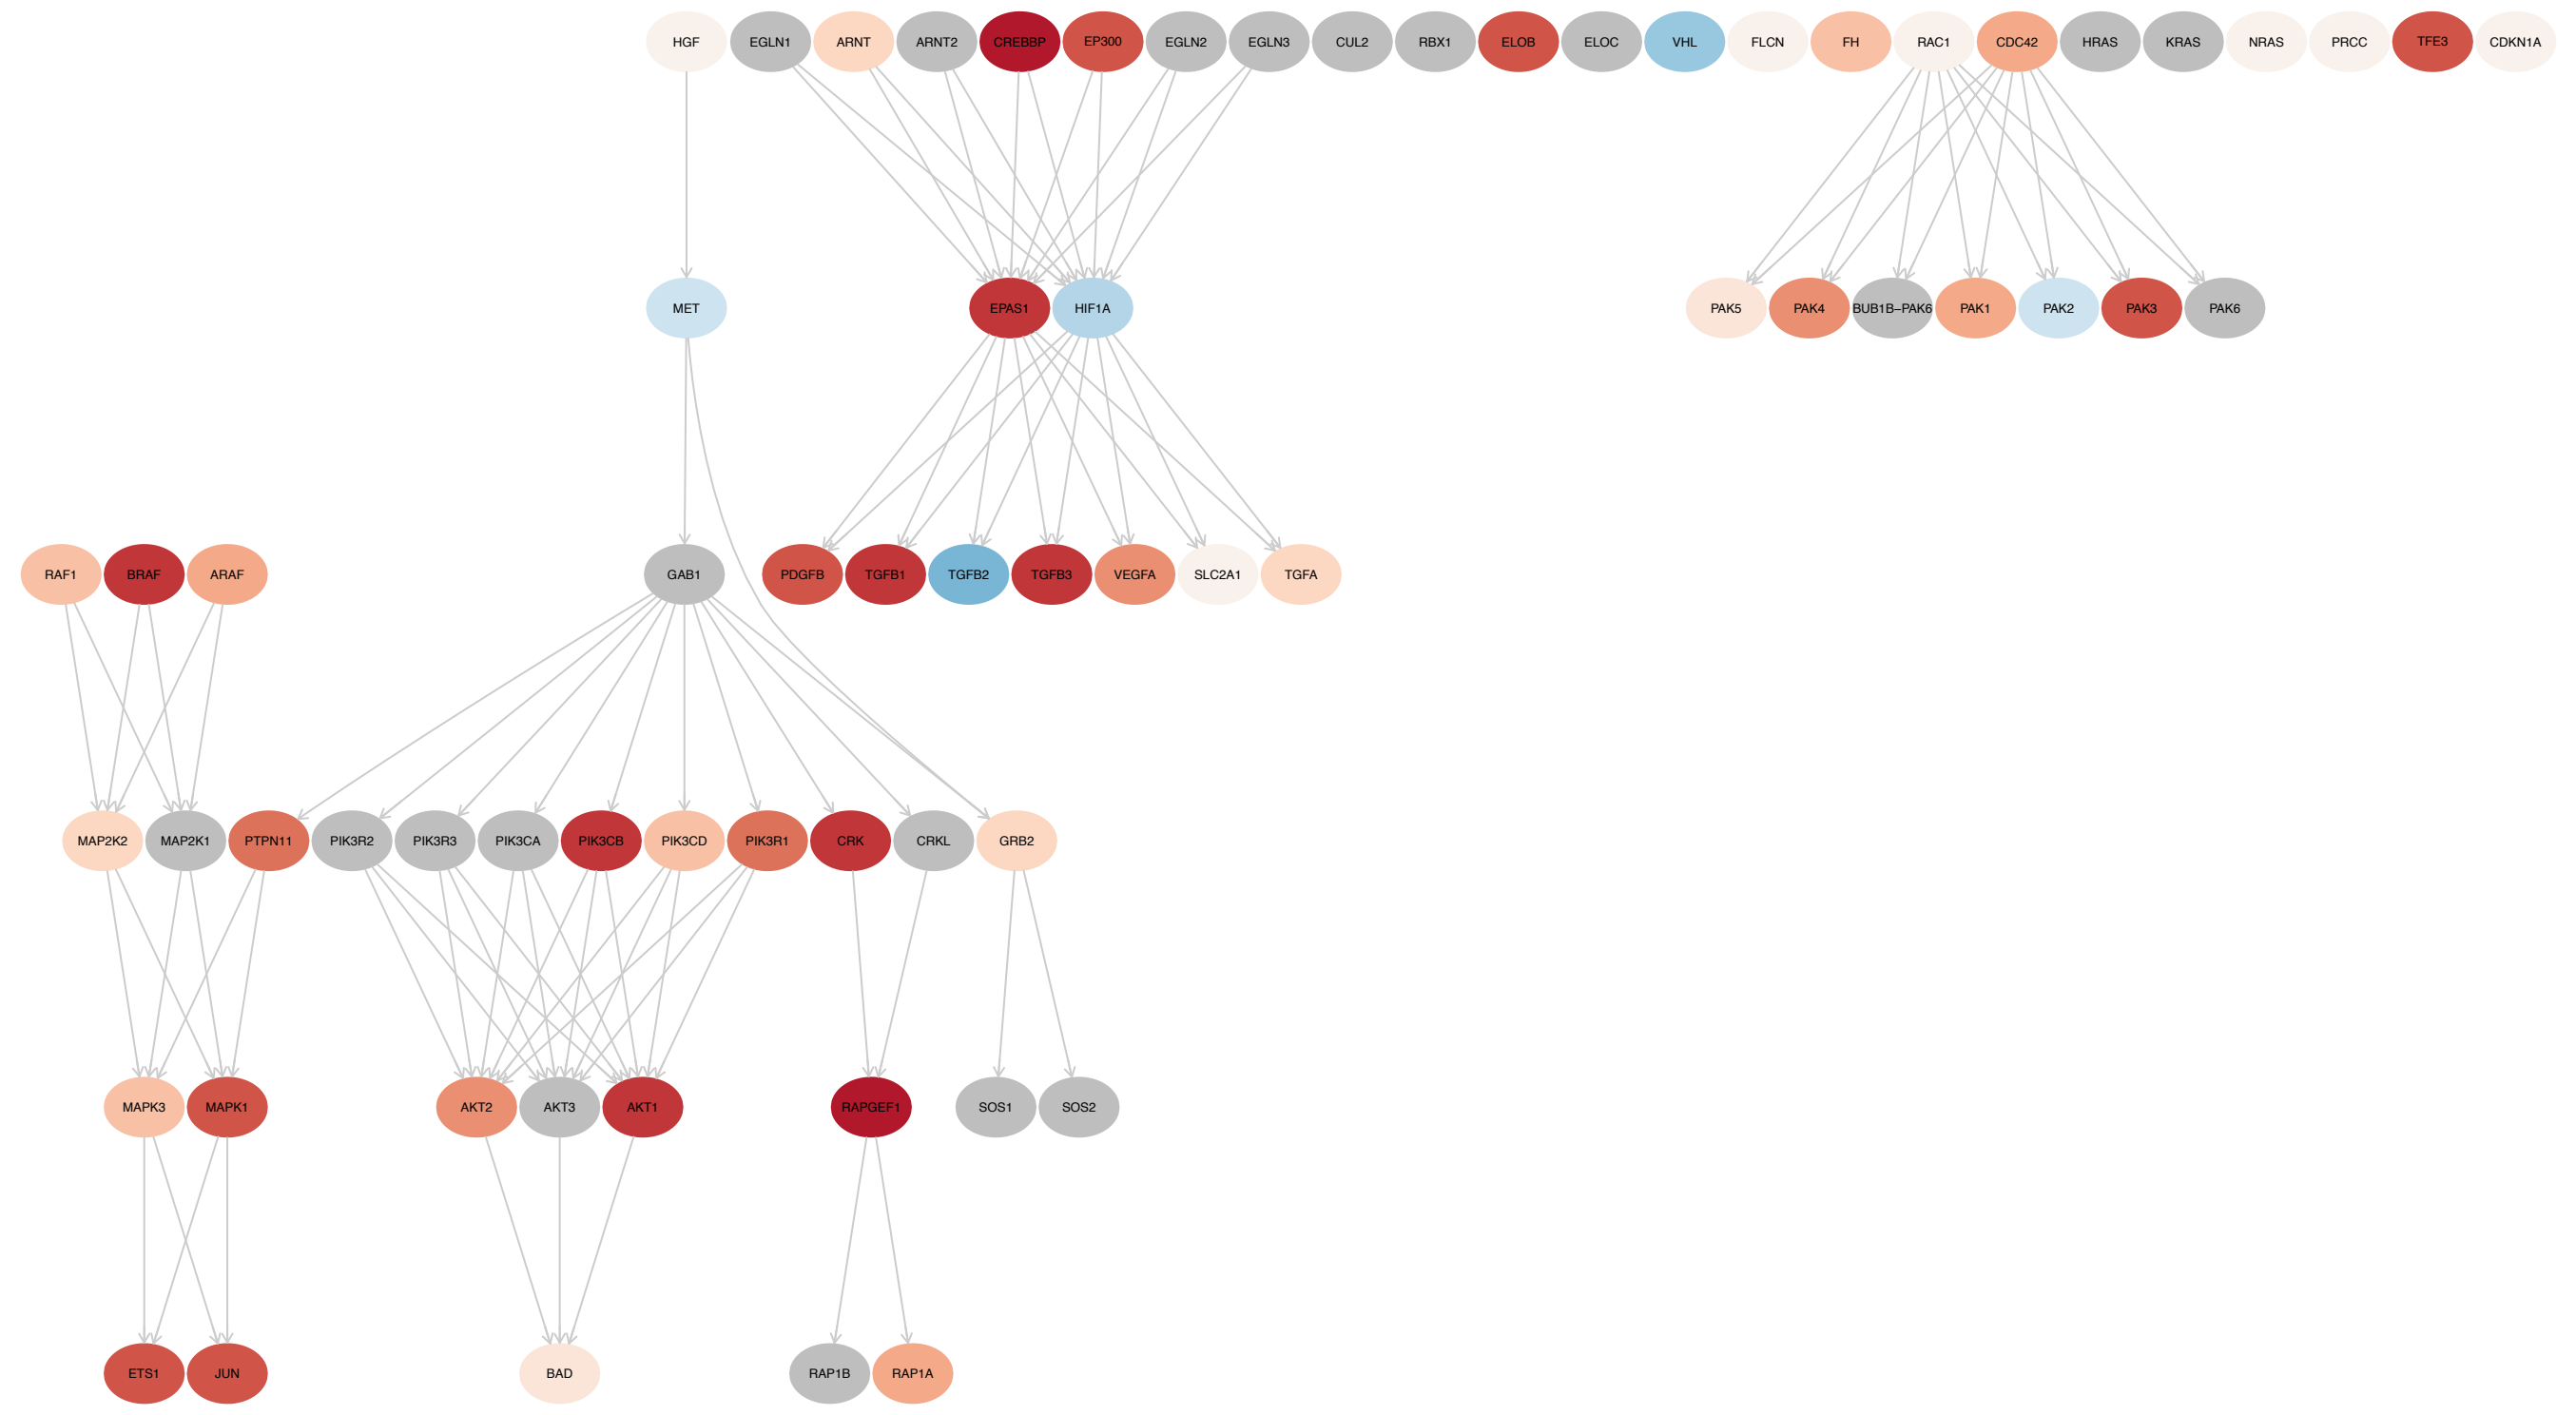

### Development

### RNA polymerase

### Ageing

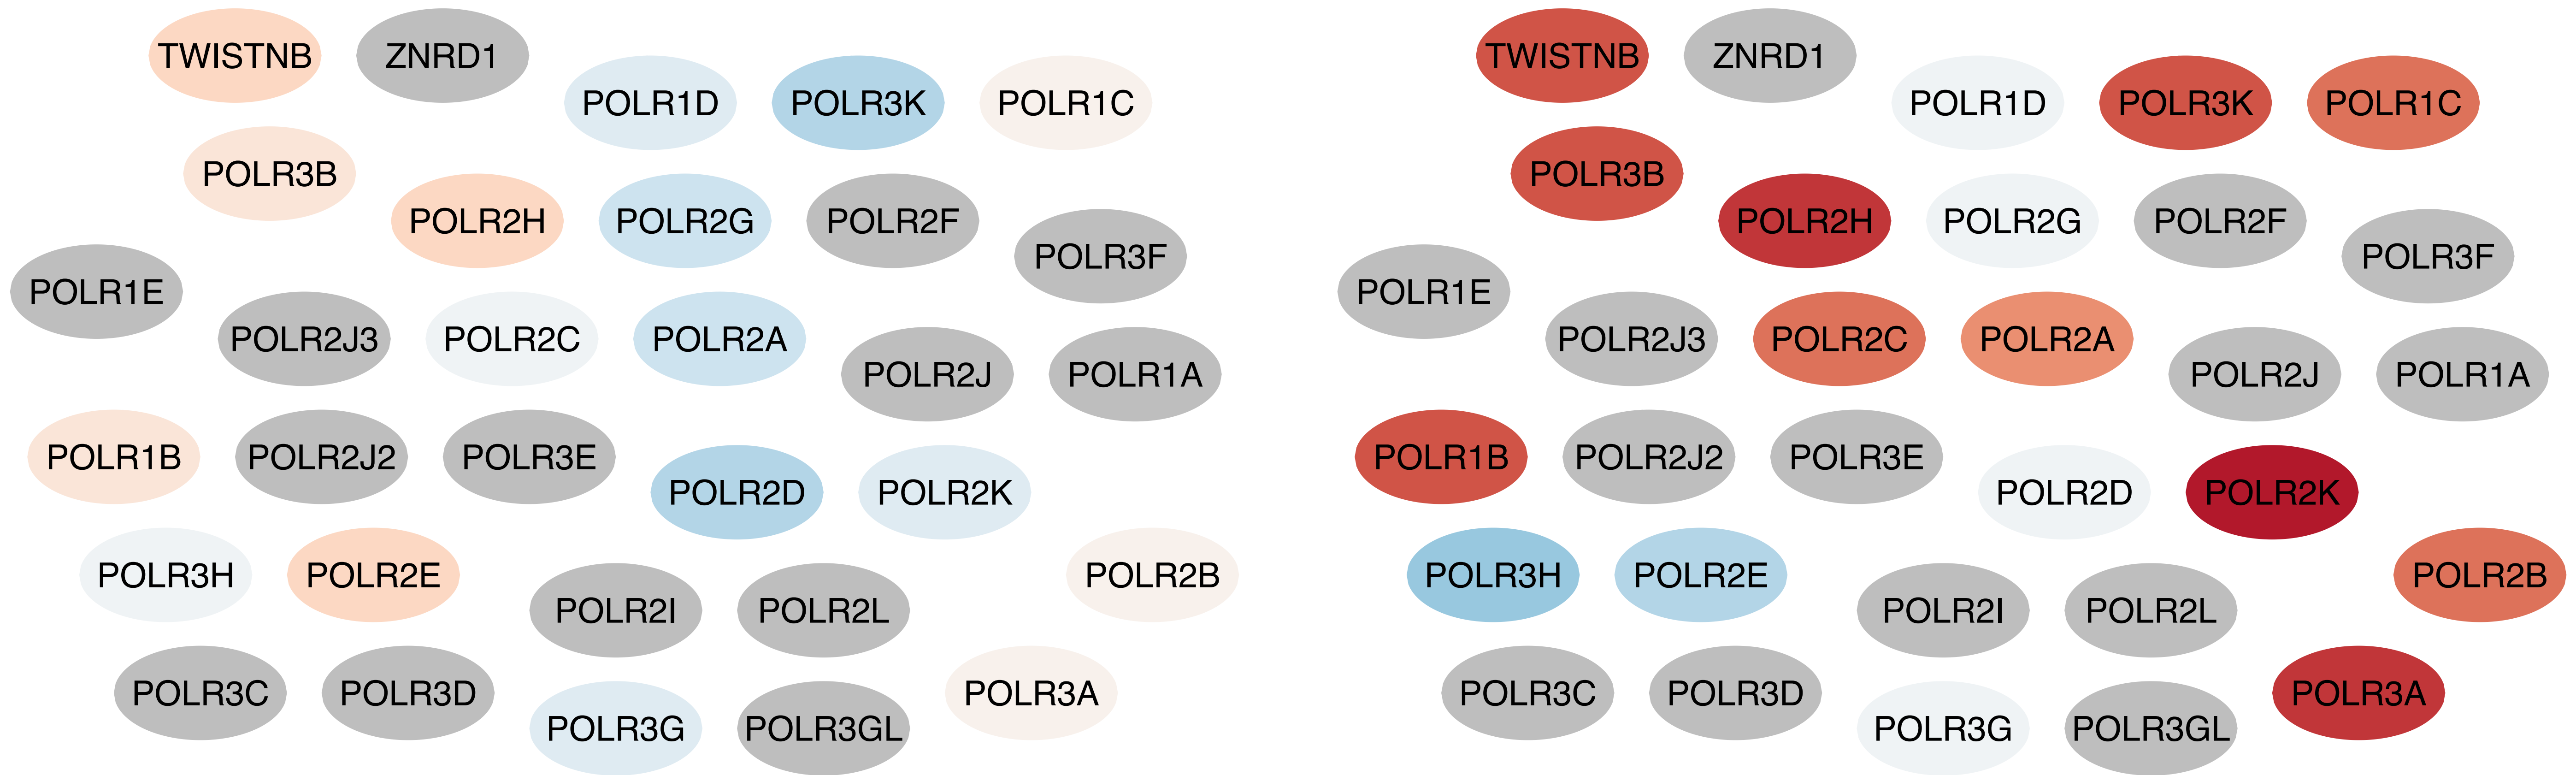



# Development

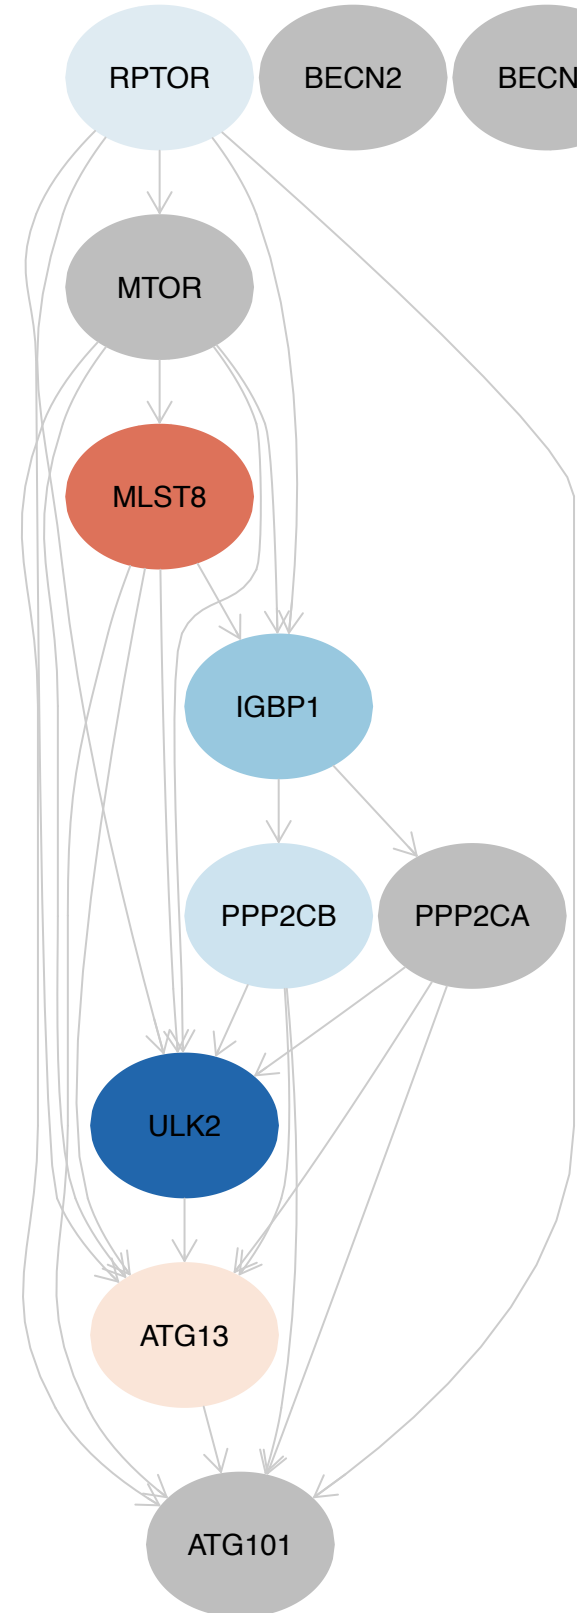

# Autophagy – other

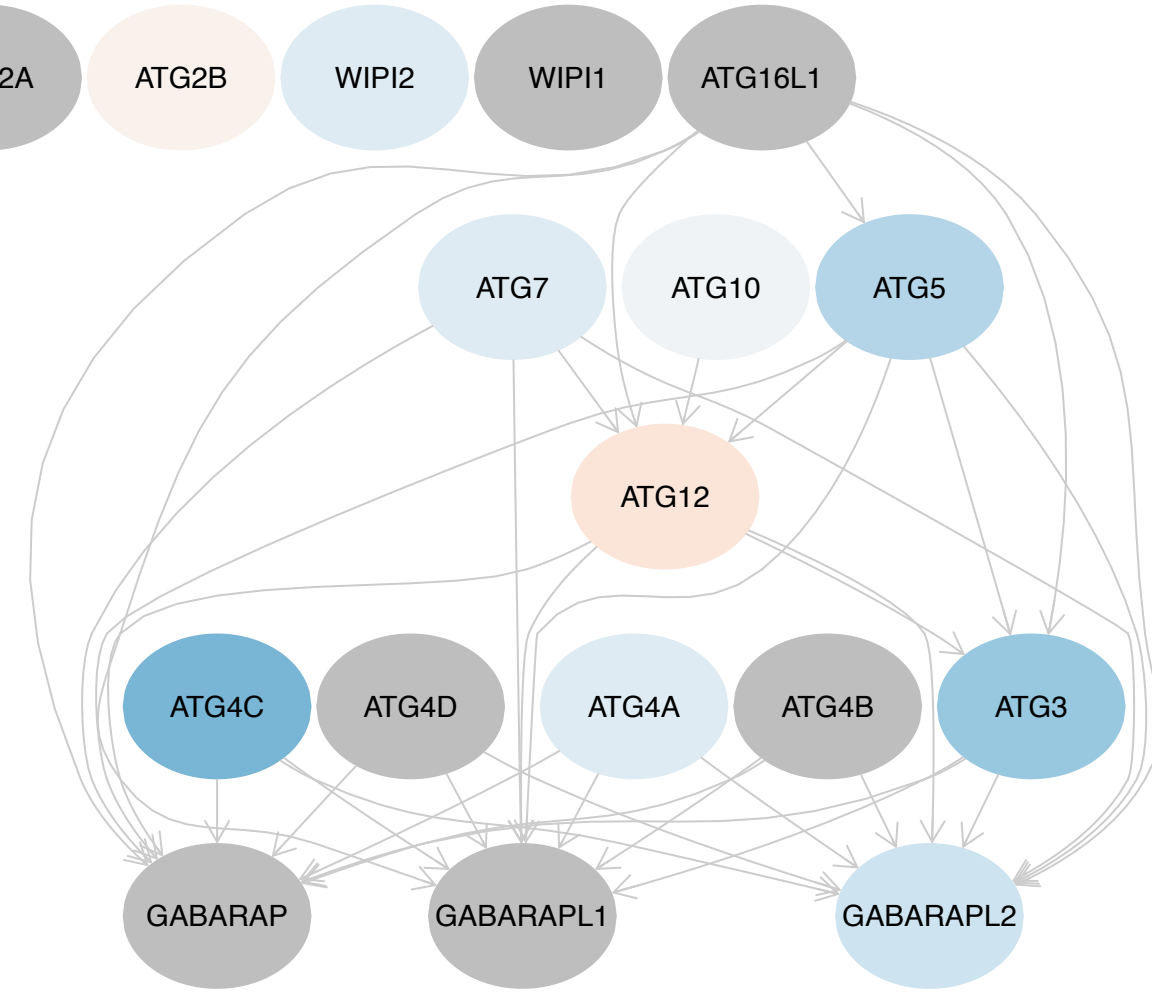

# Ageing

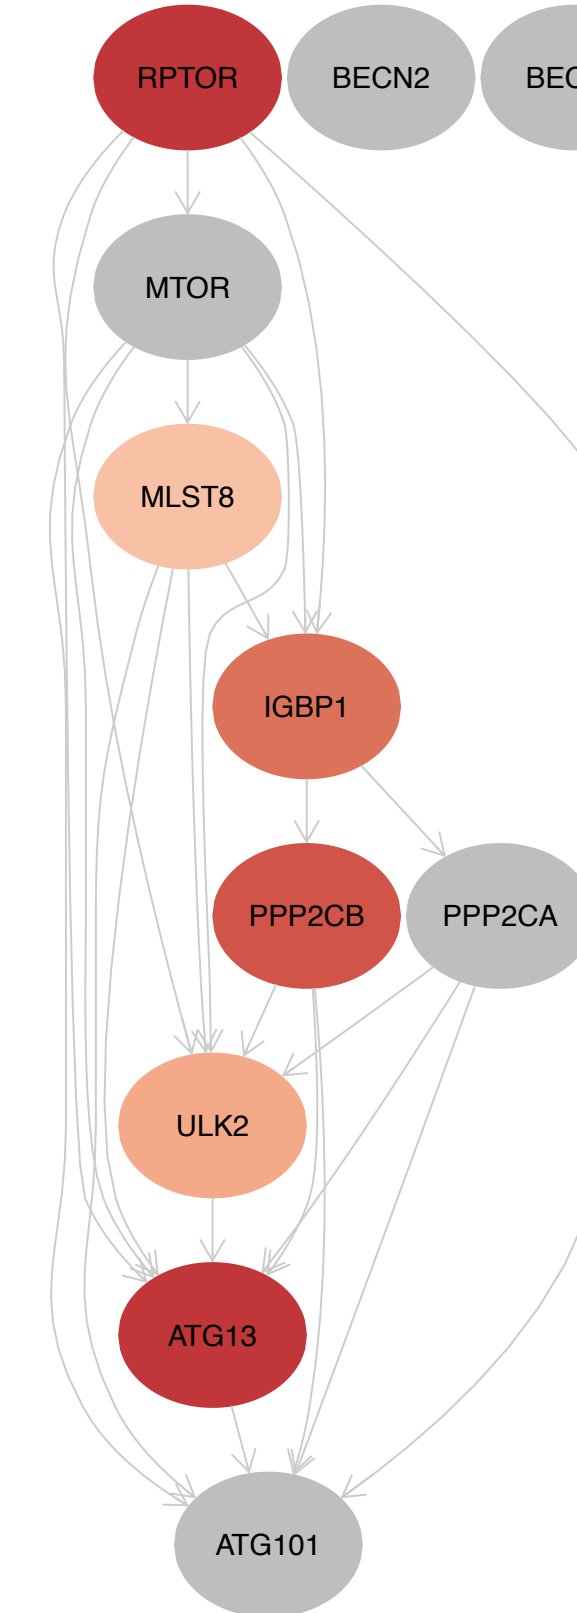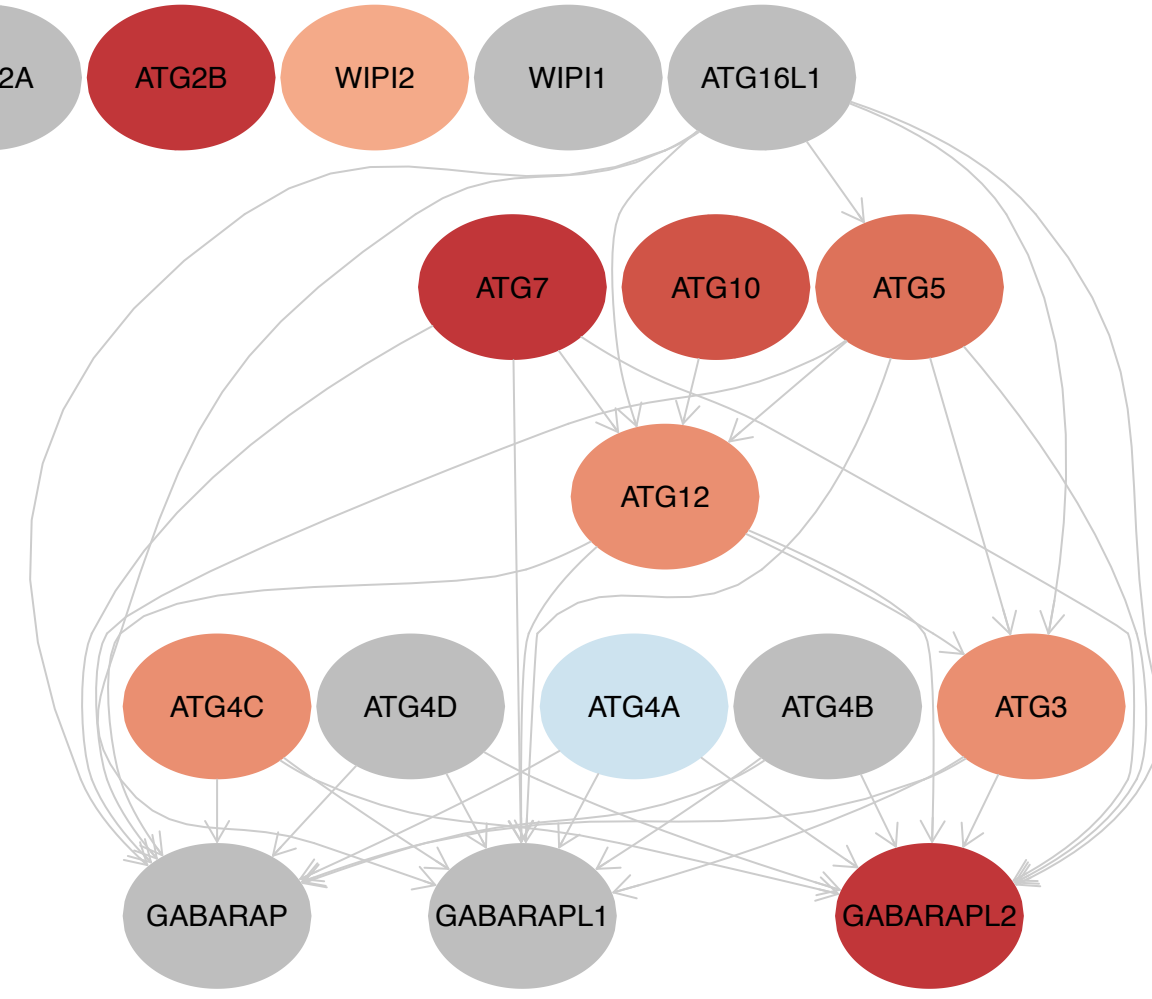





## Development

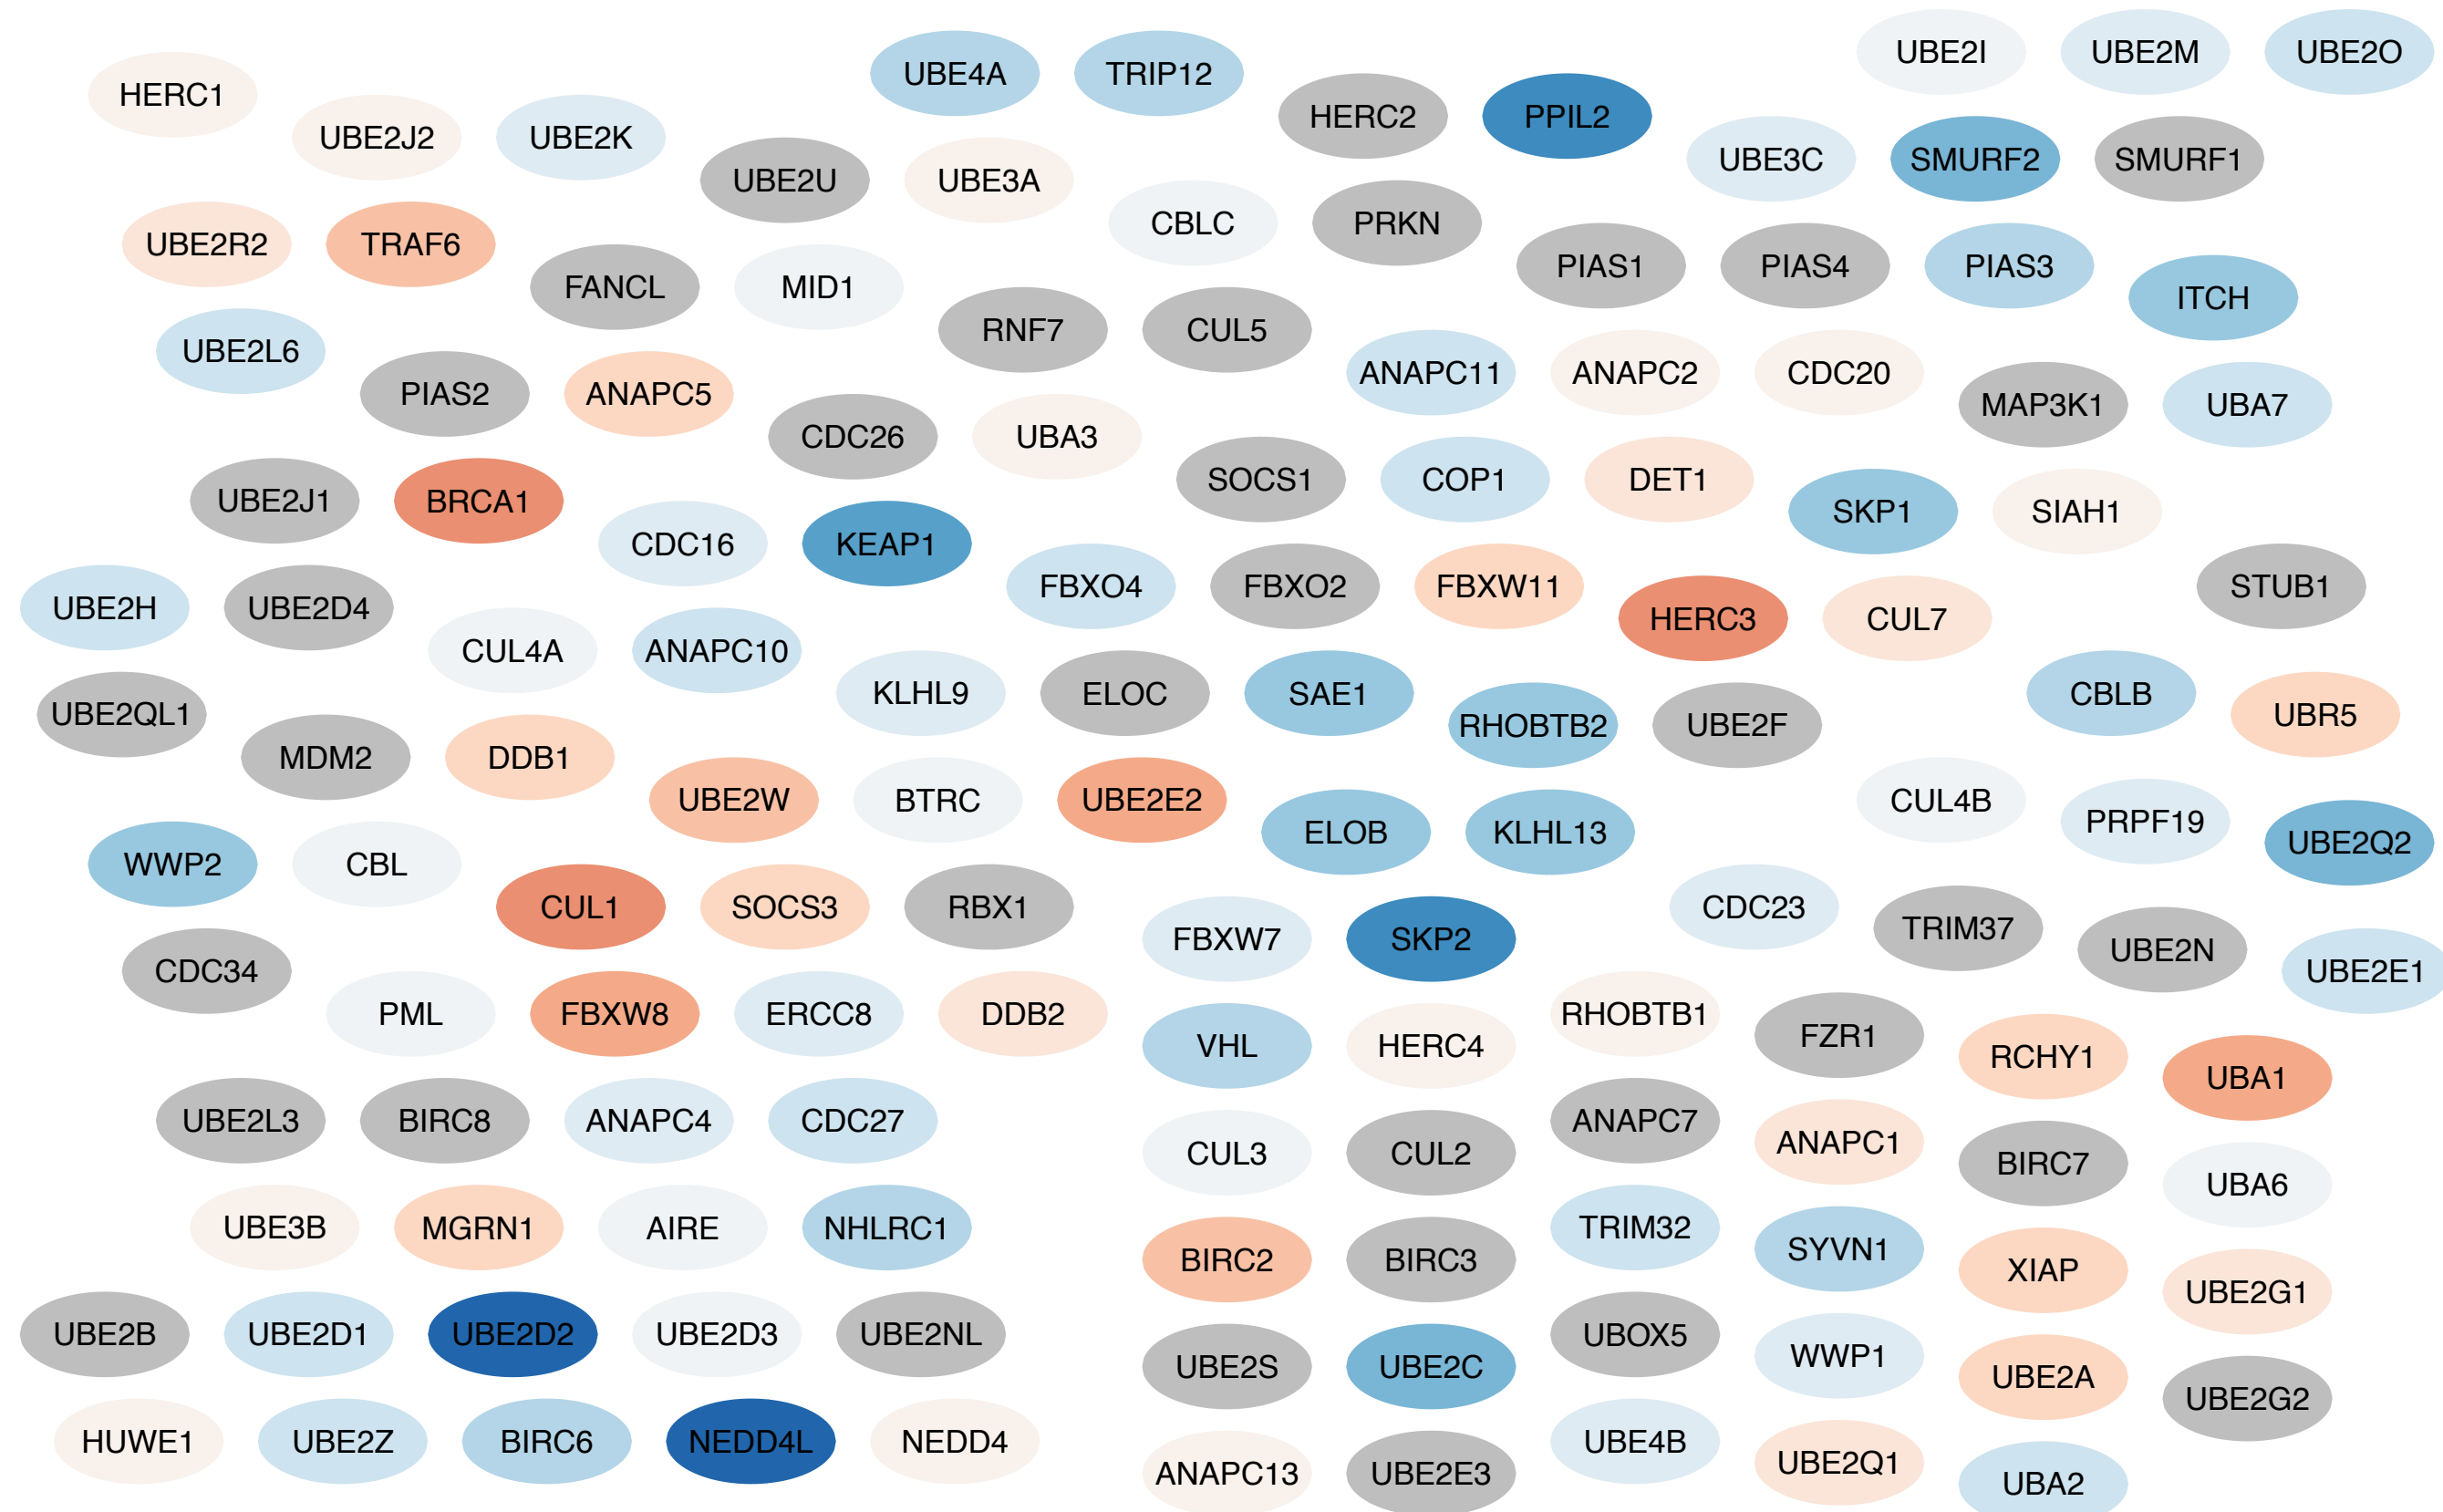

## Ubiquitin mediated proteolysis

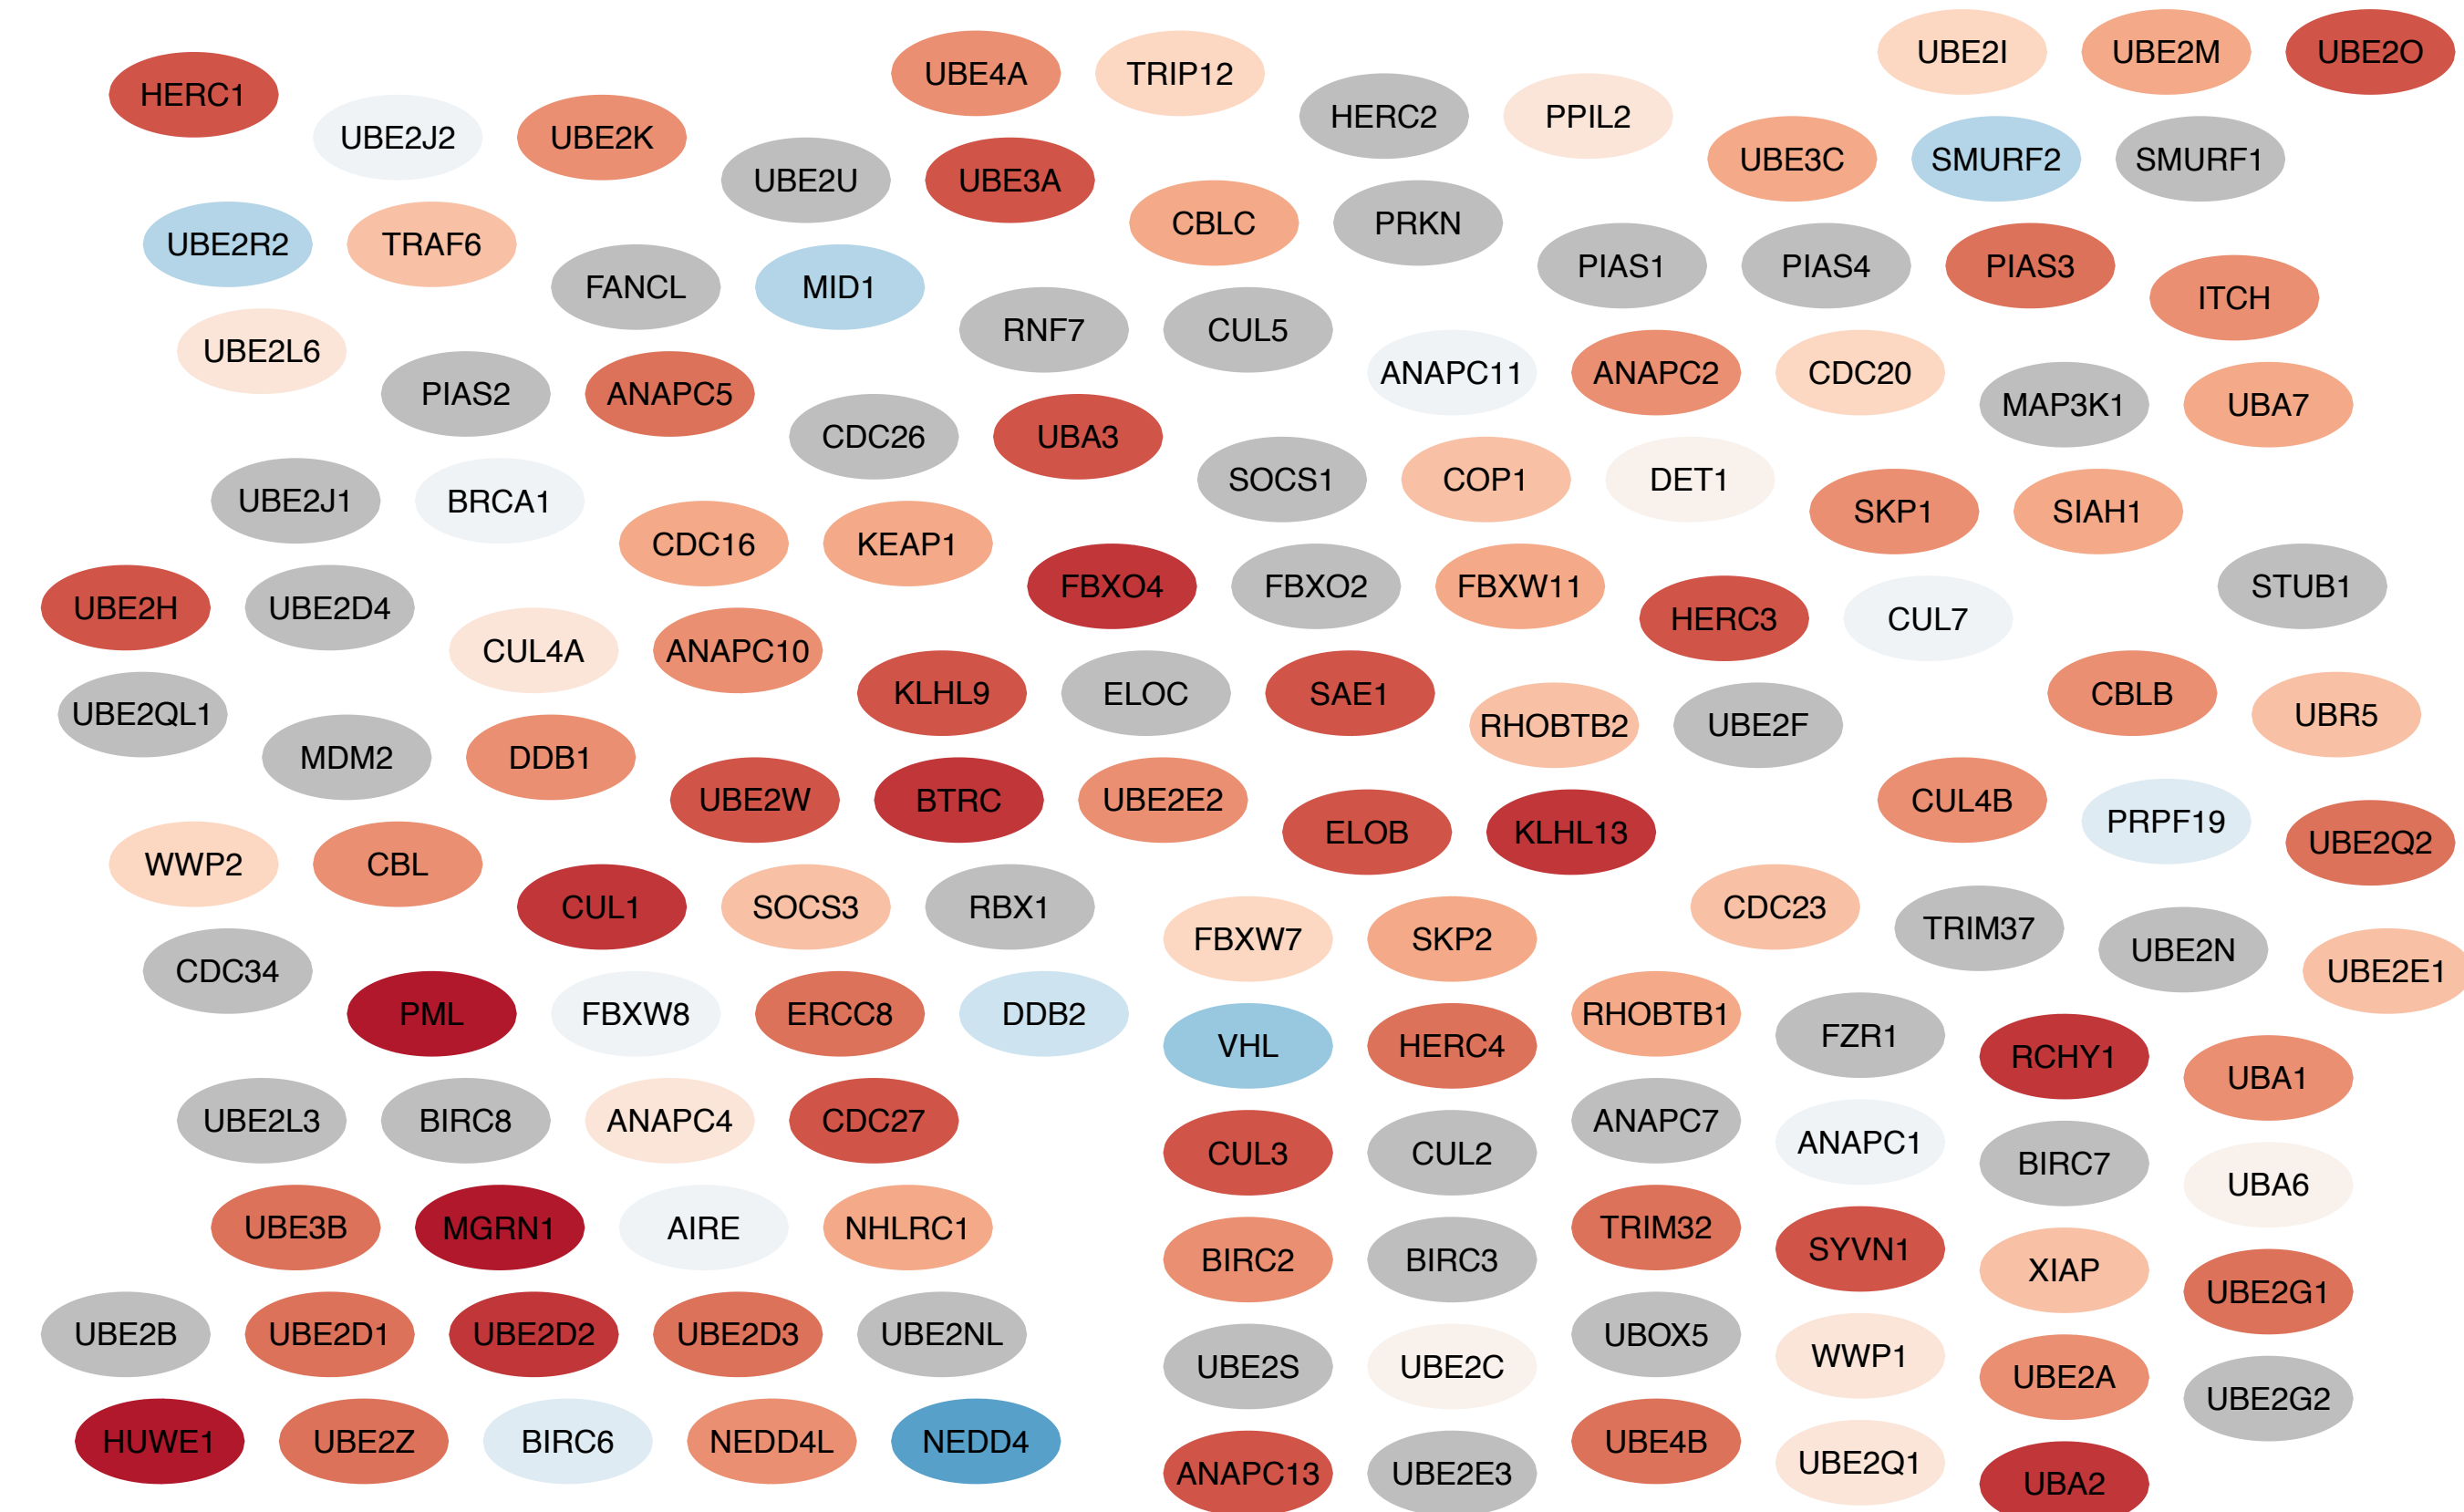

## Ageing









# Development

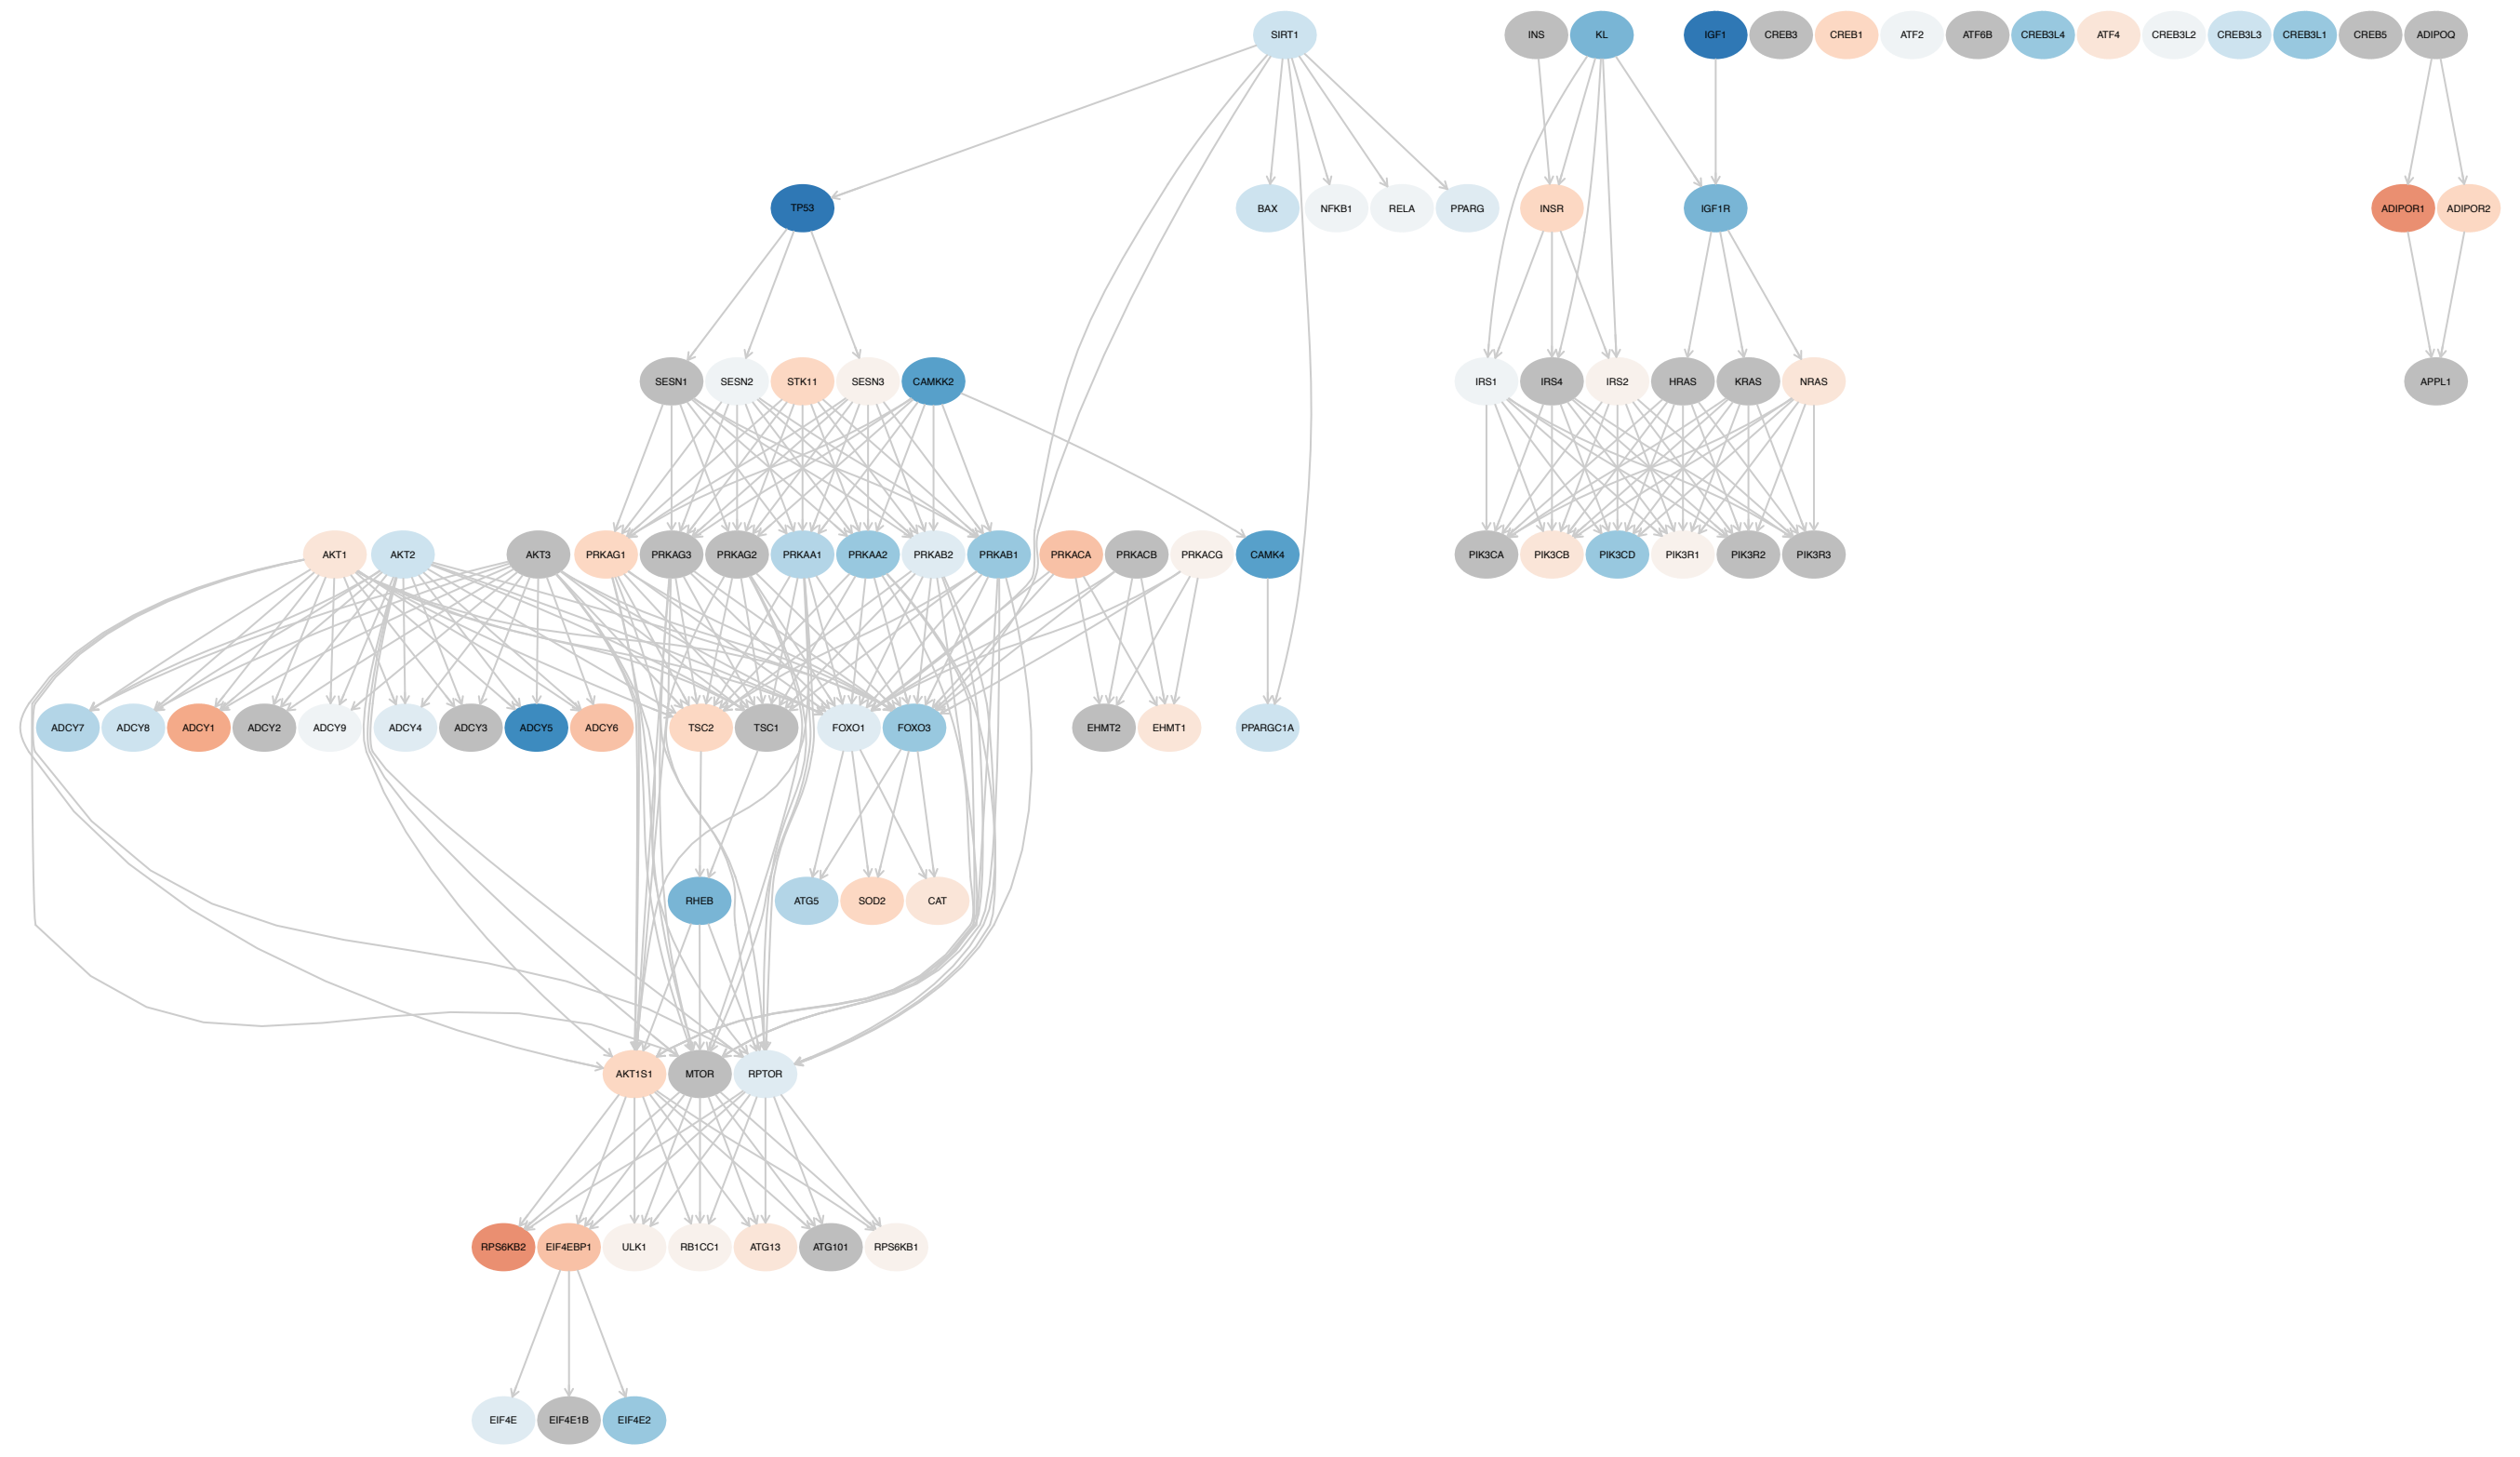

# Longevity regulating pathway

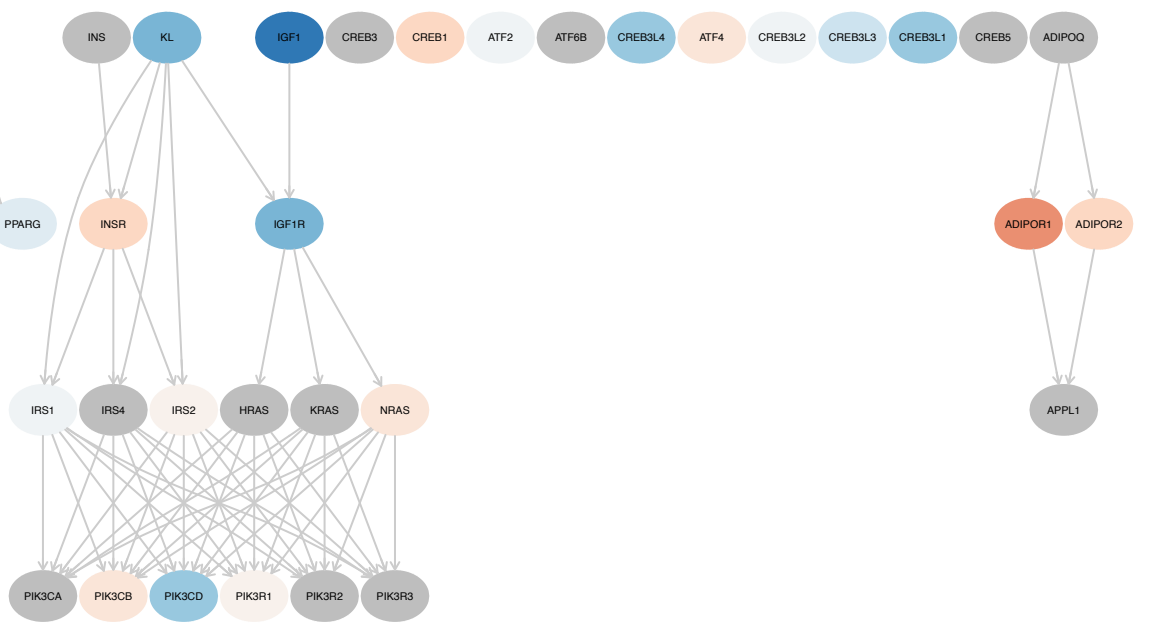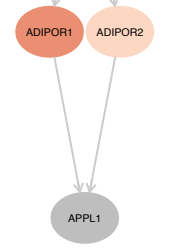

# Ageing

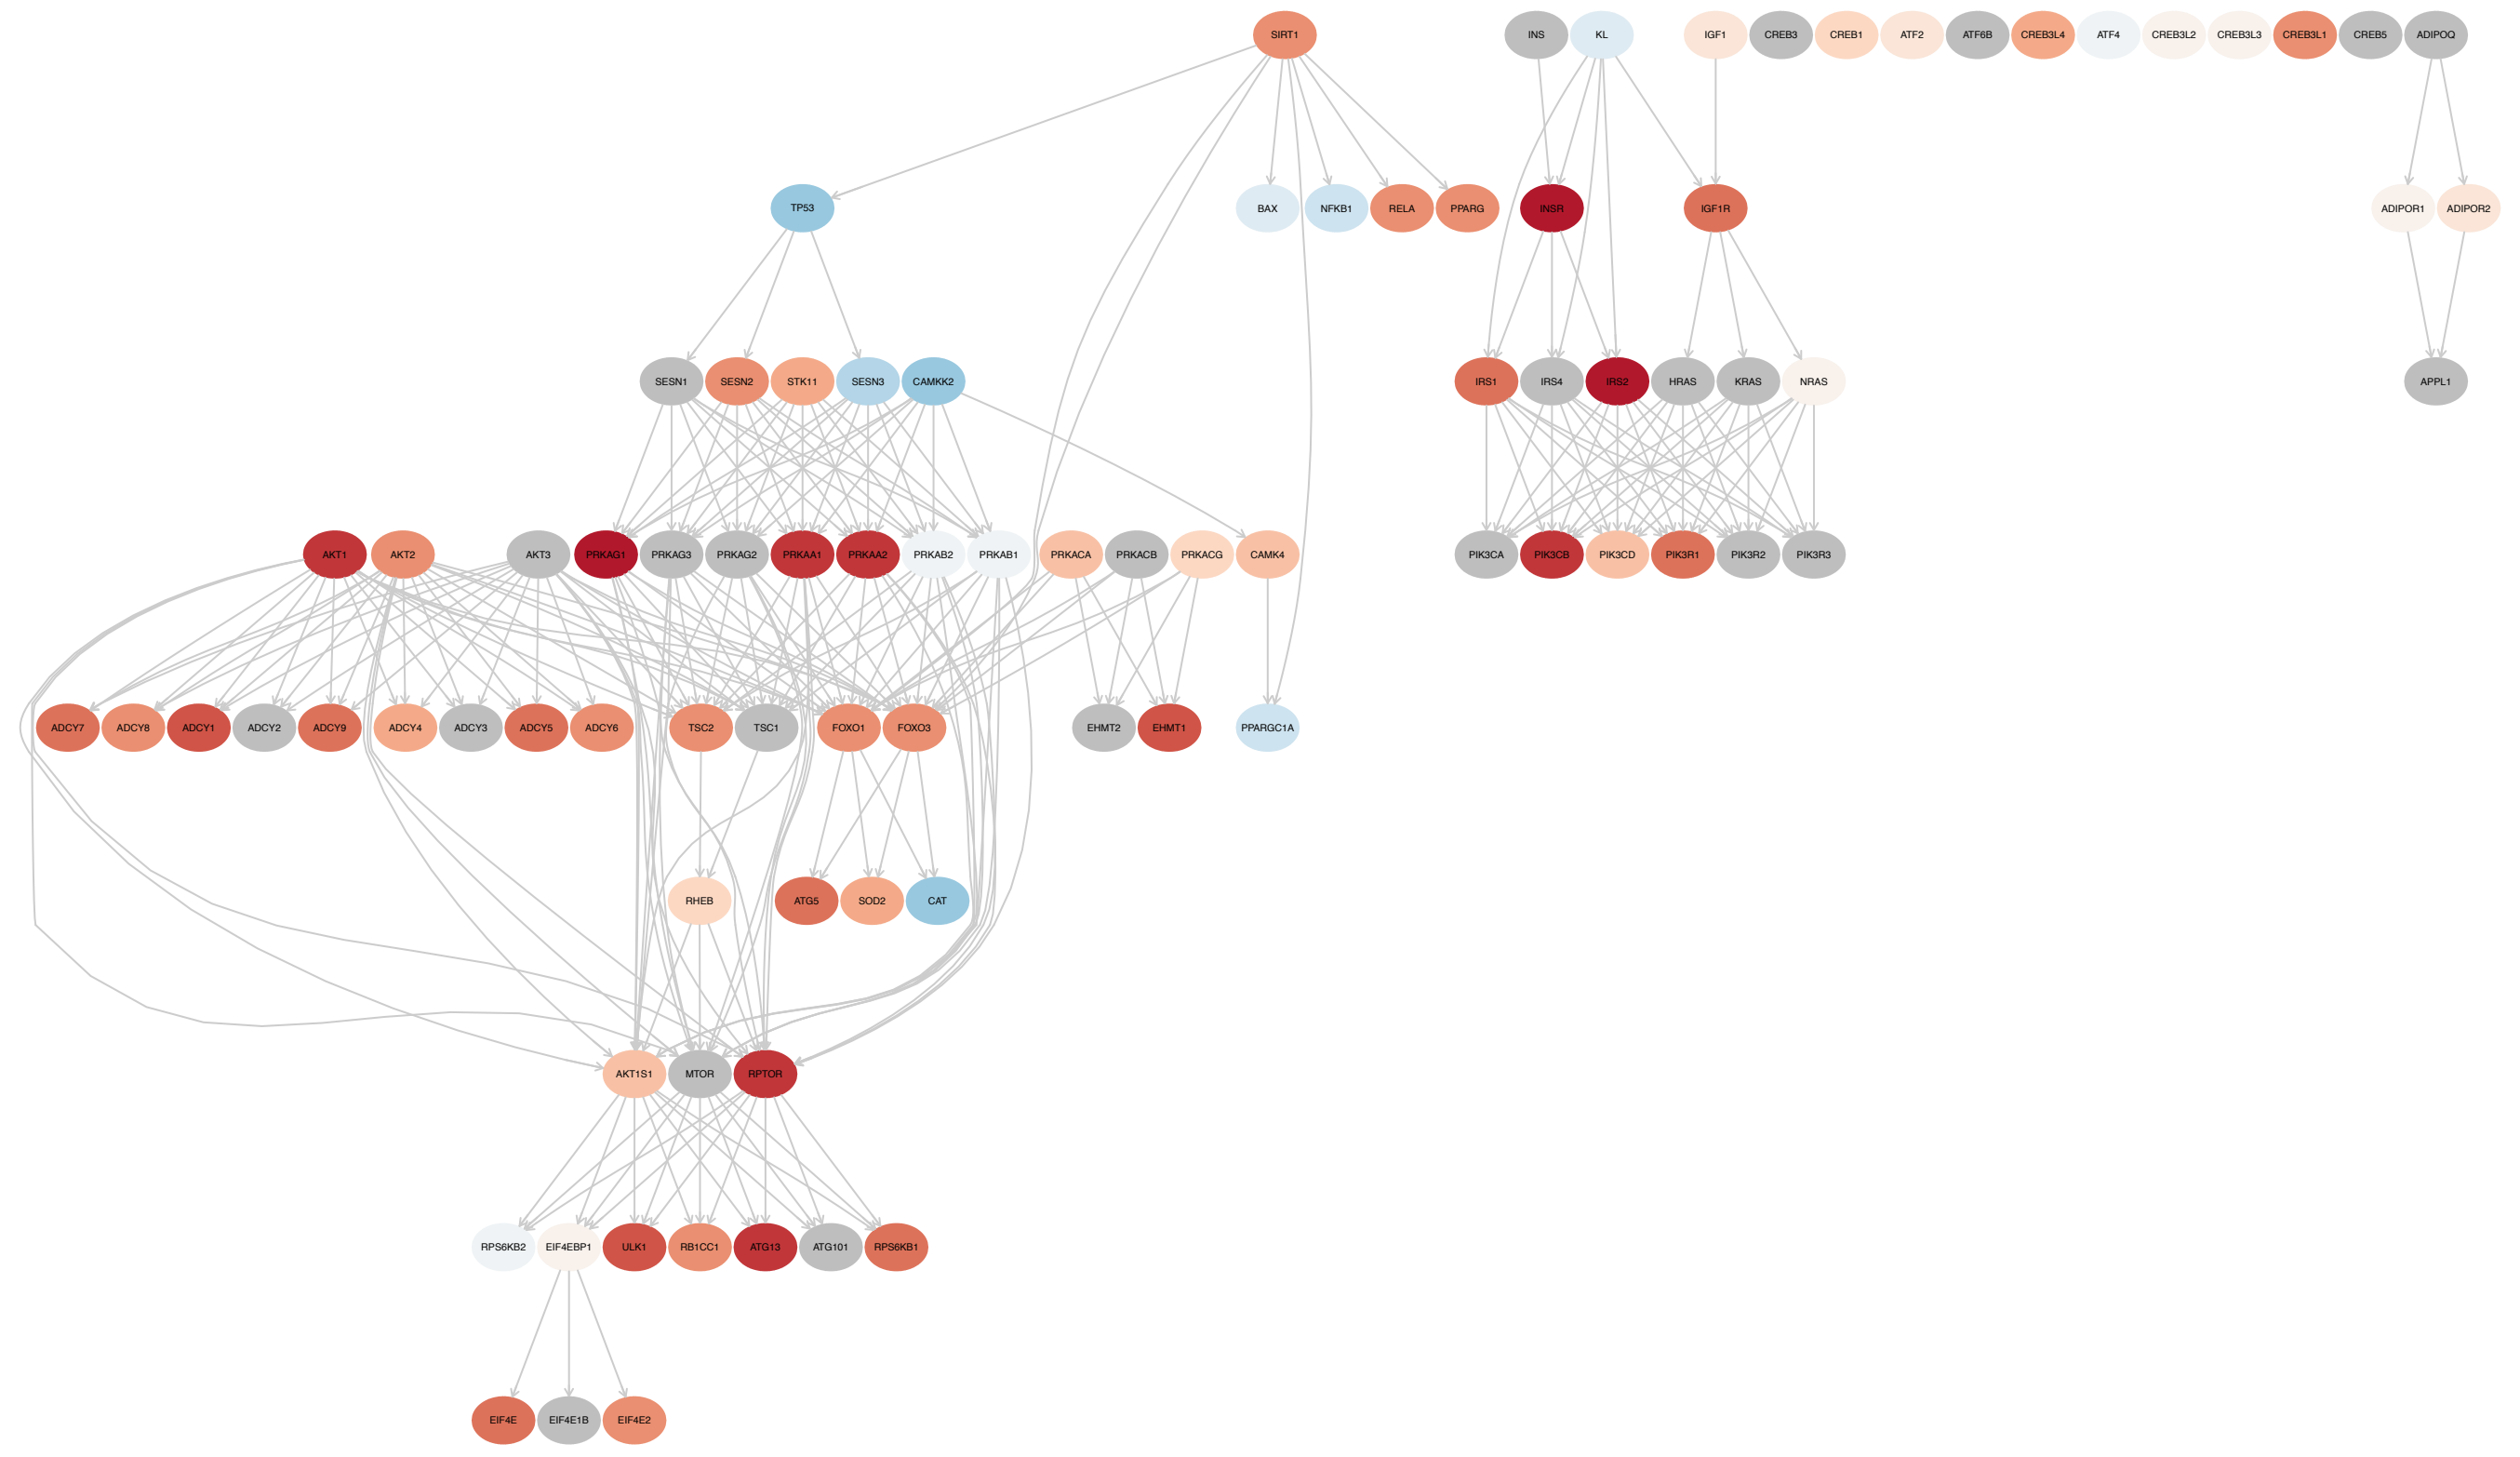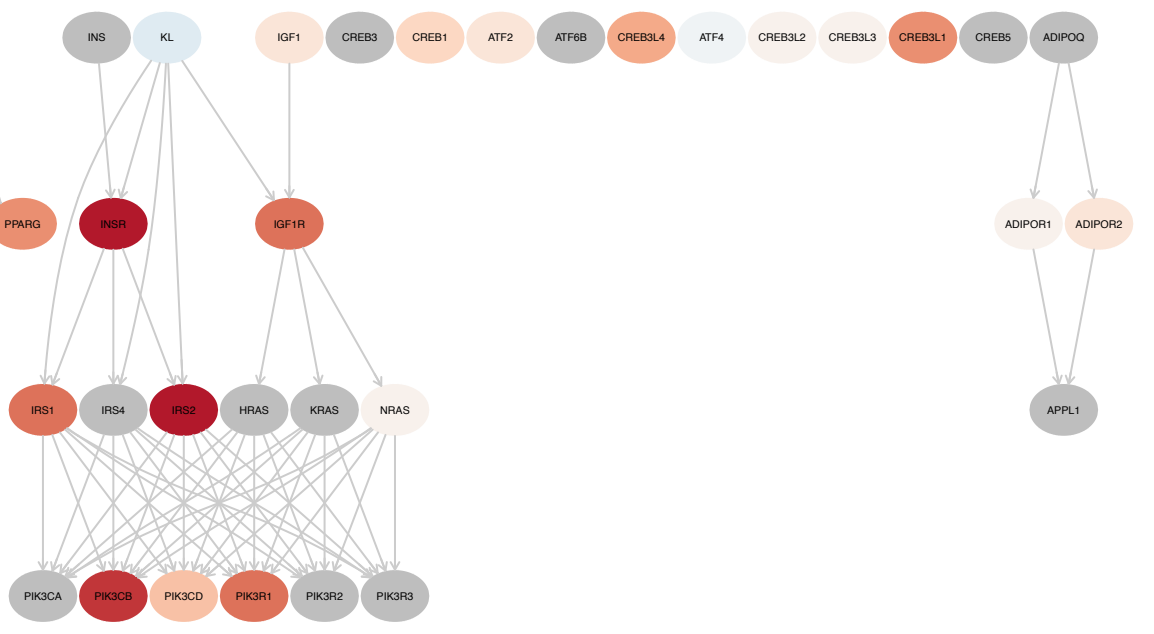

# Development

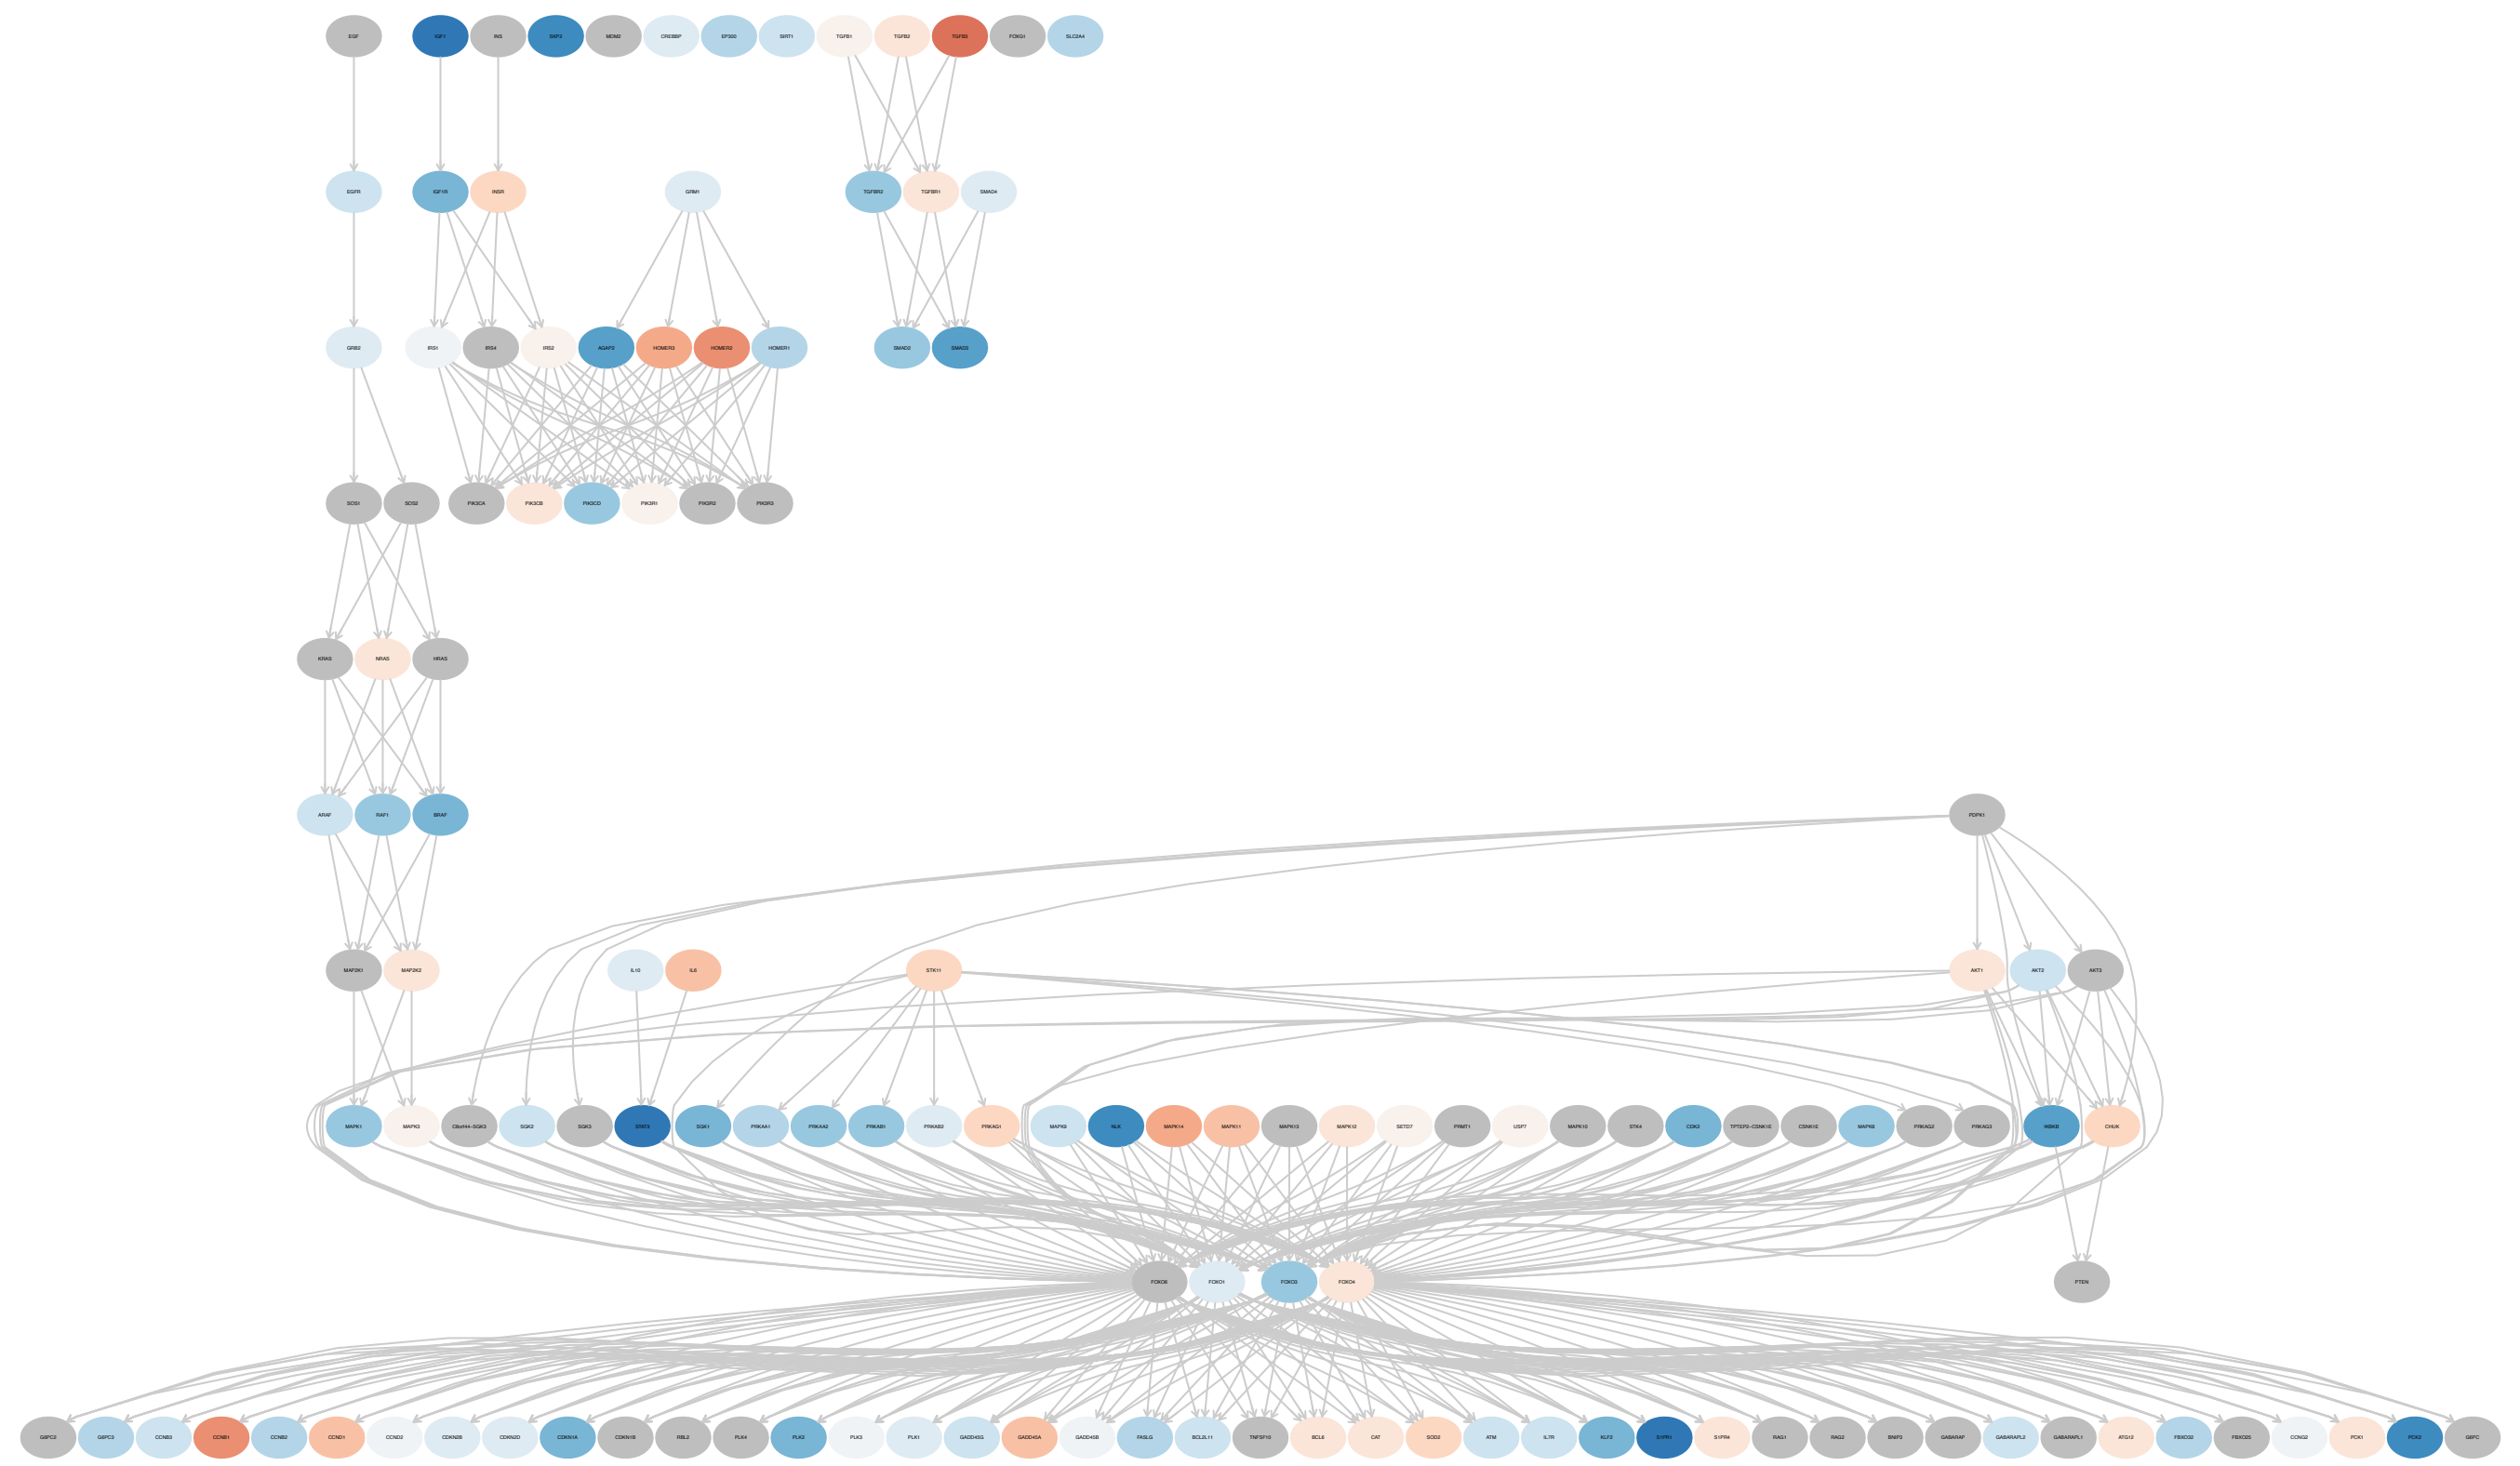

# FoxO signaling pathway

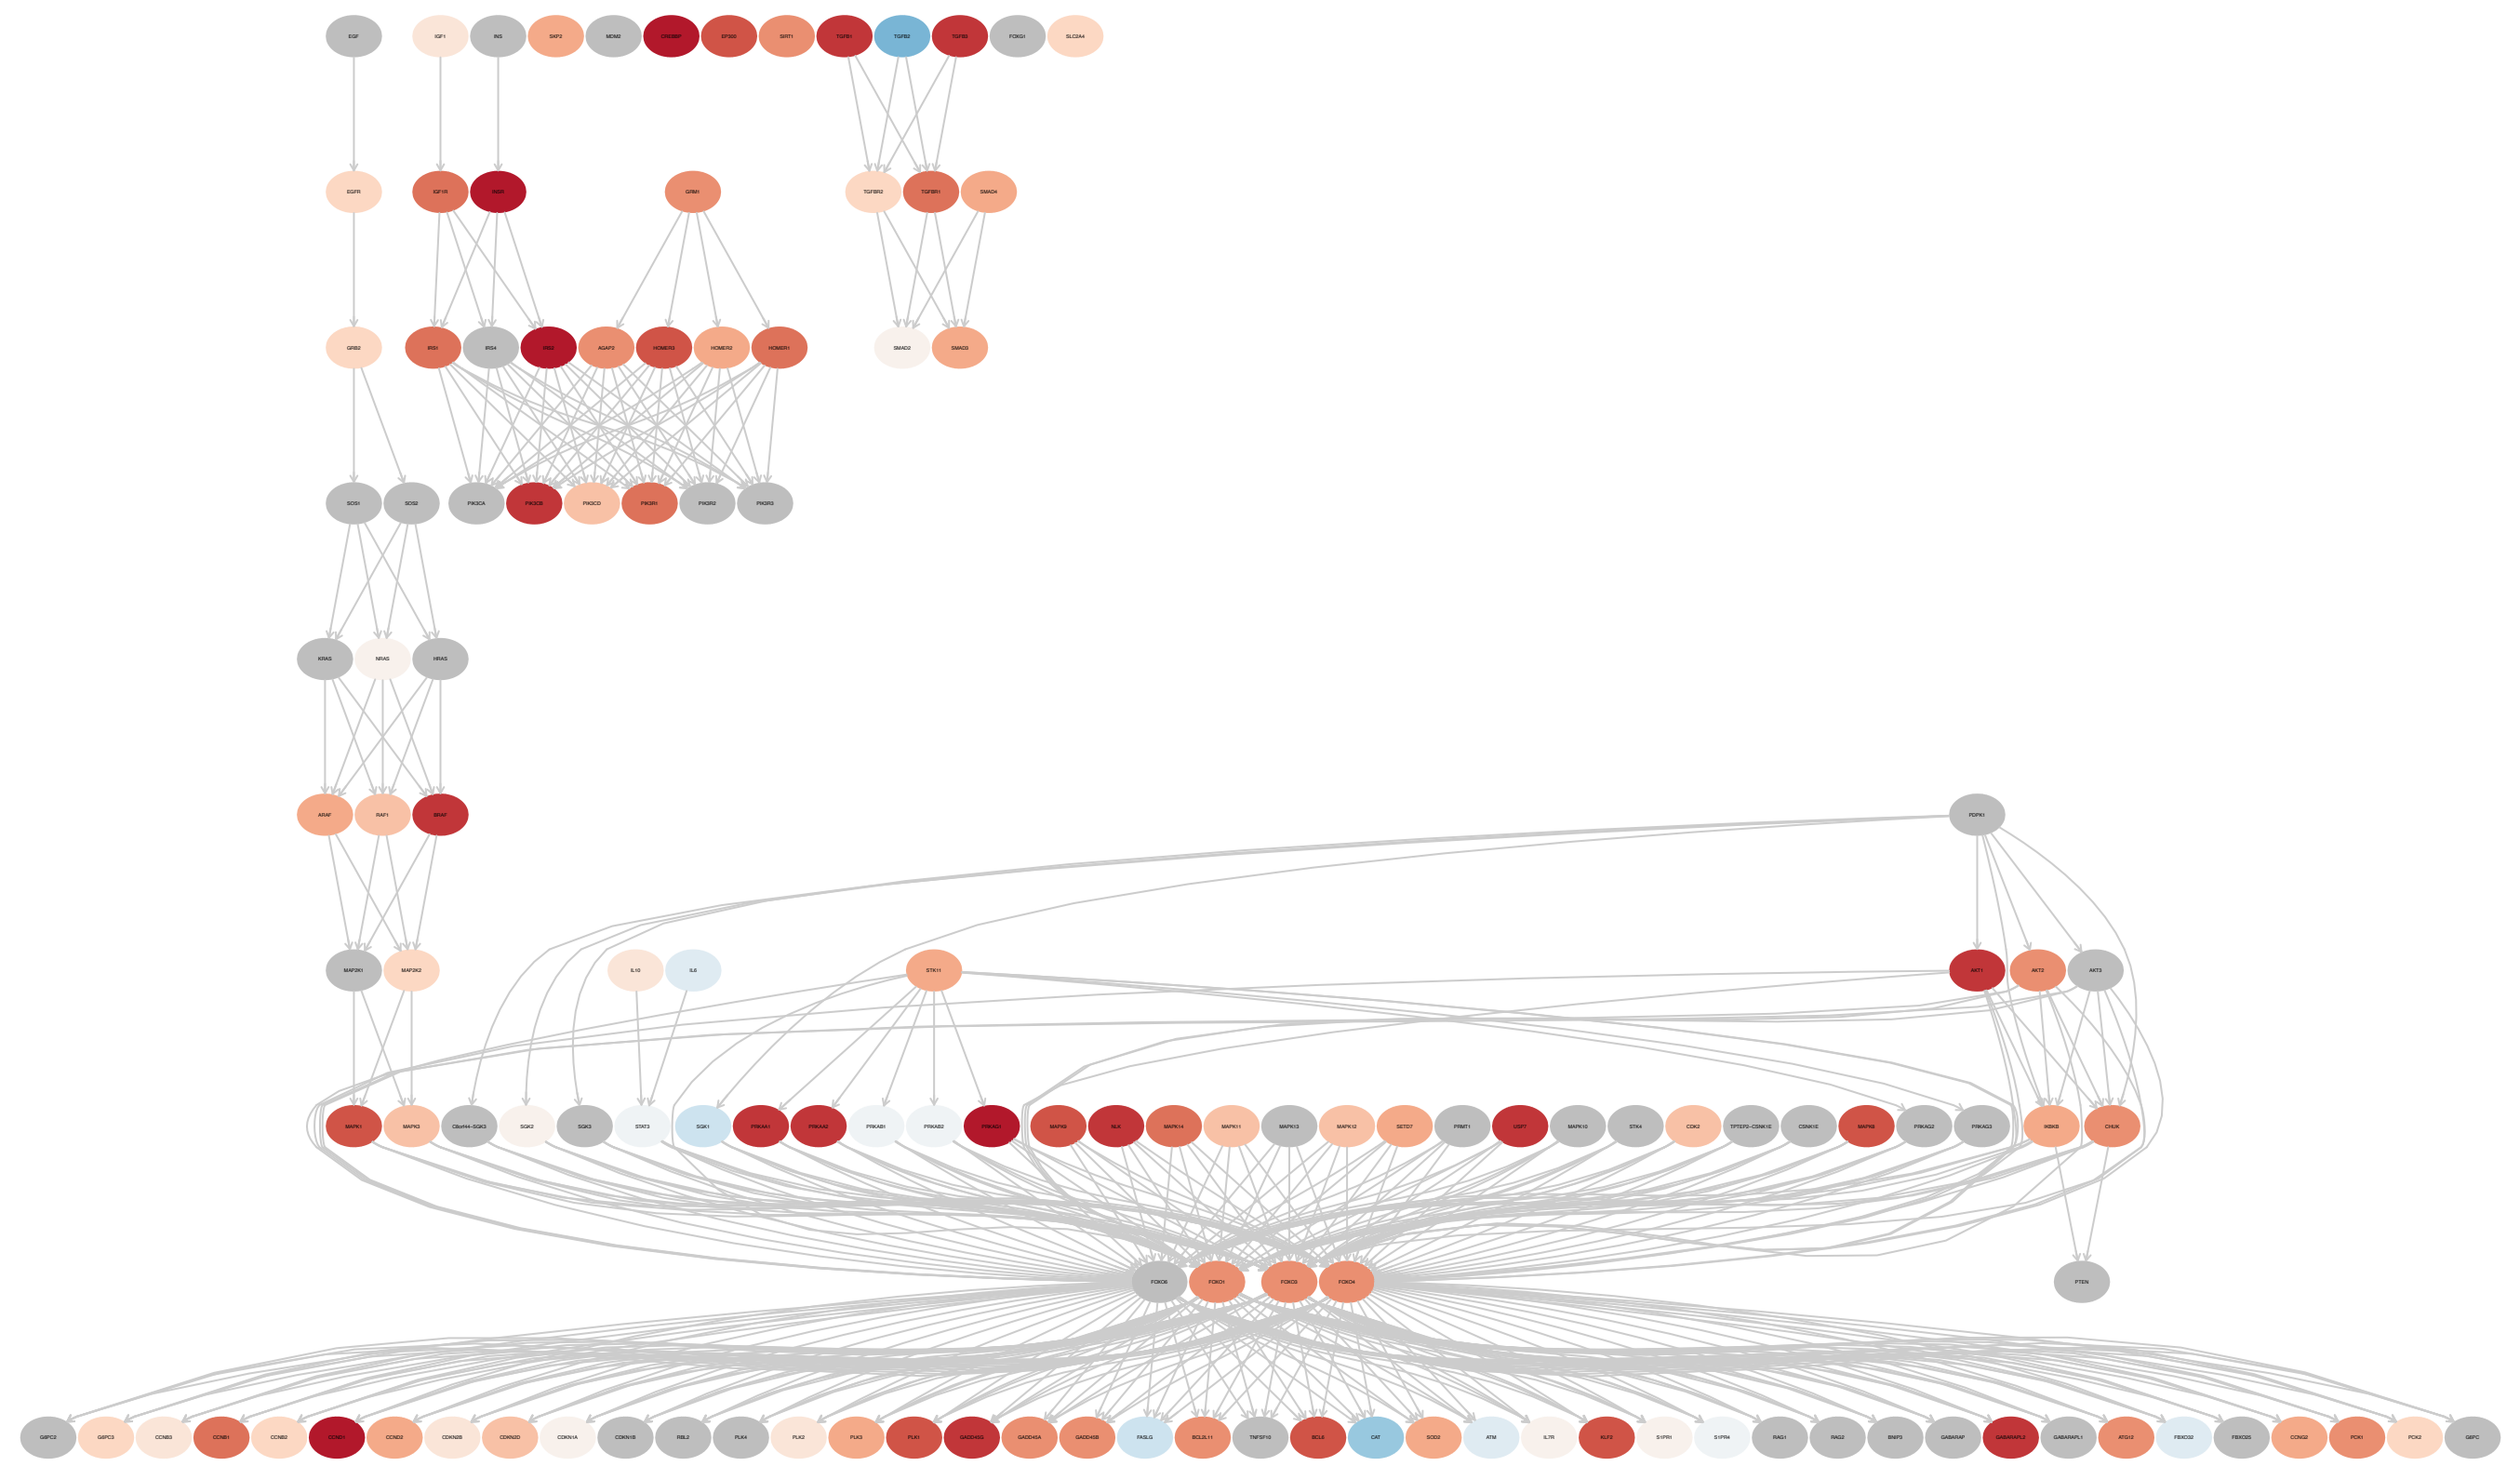

# Ageing







# Development

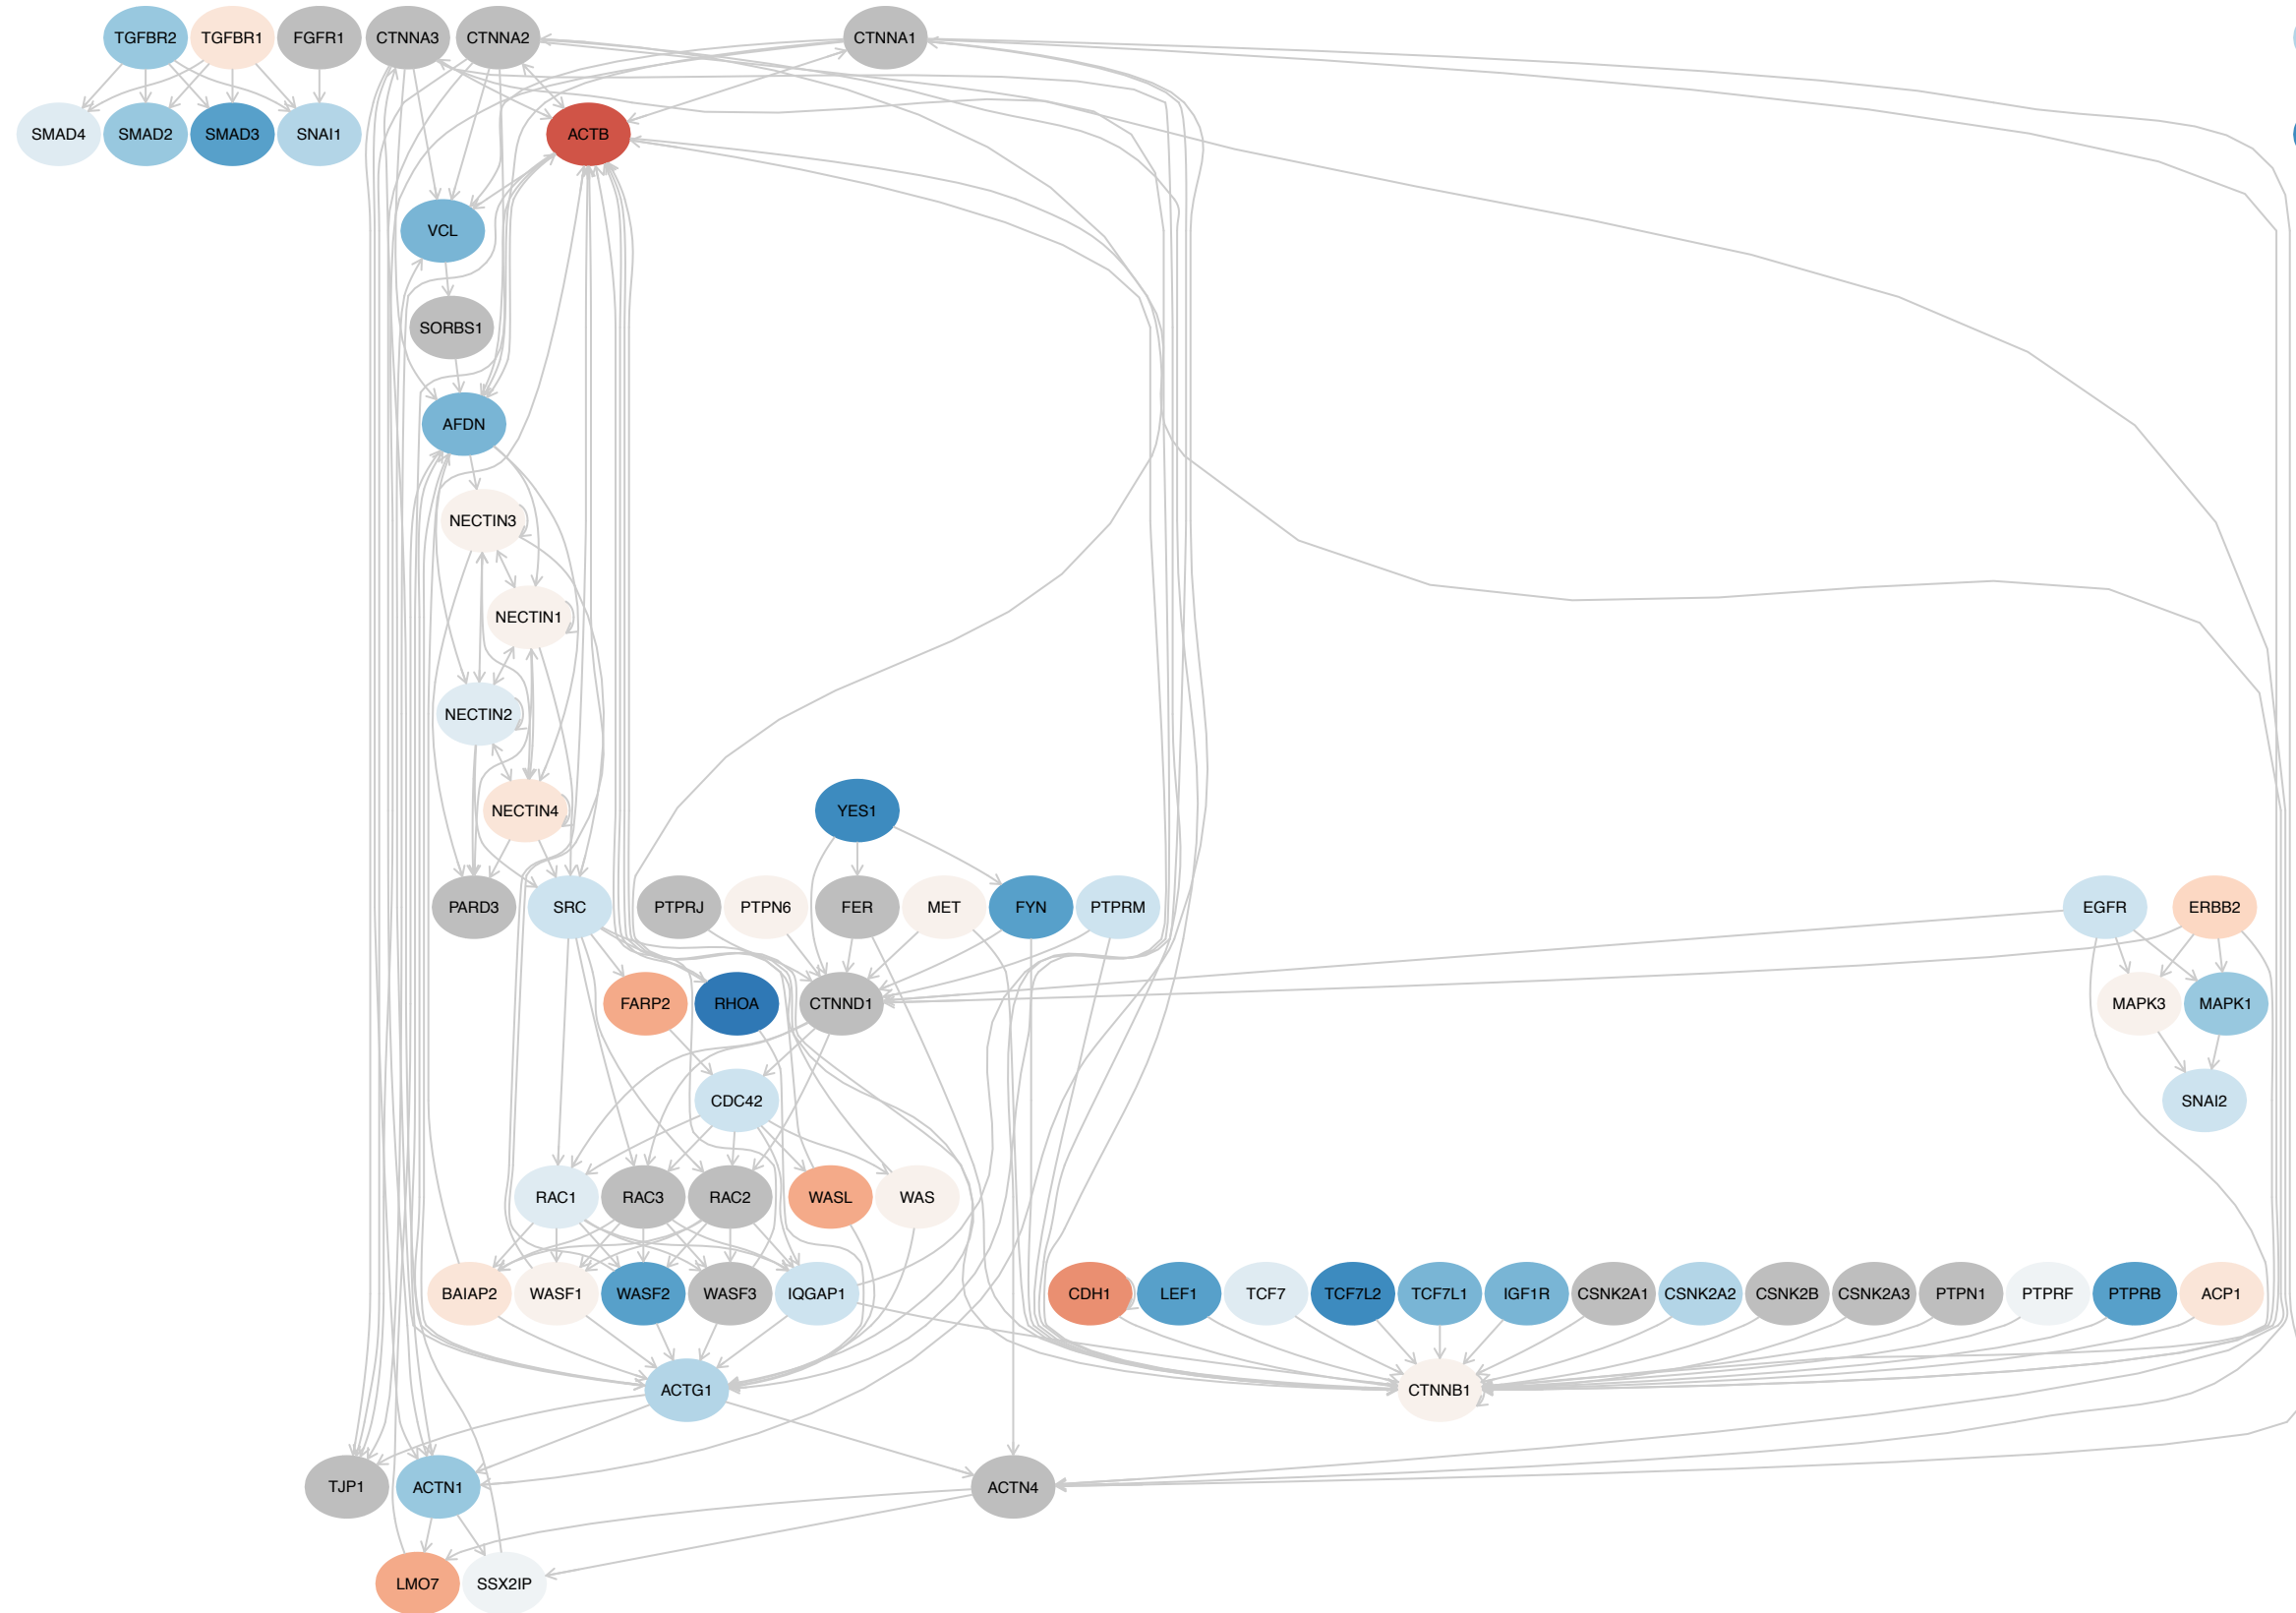

# Adherens junction

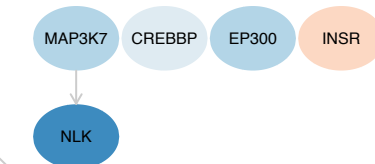

# Ageing

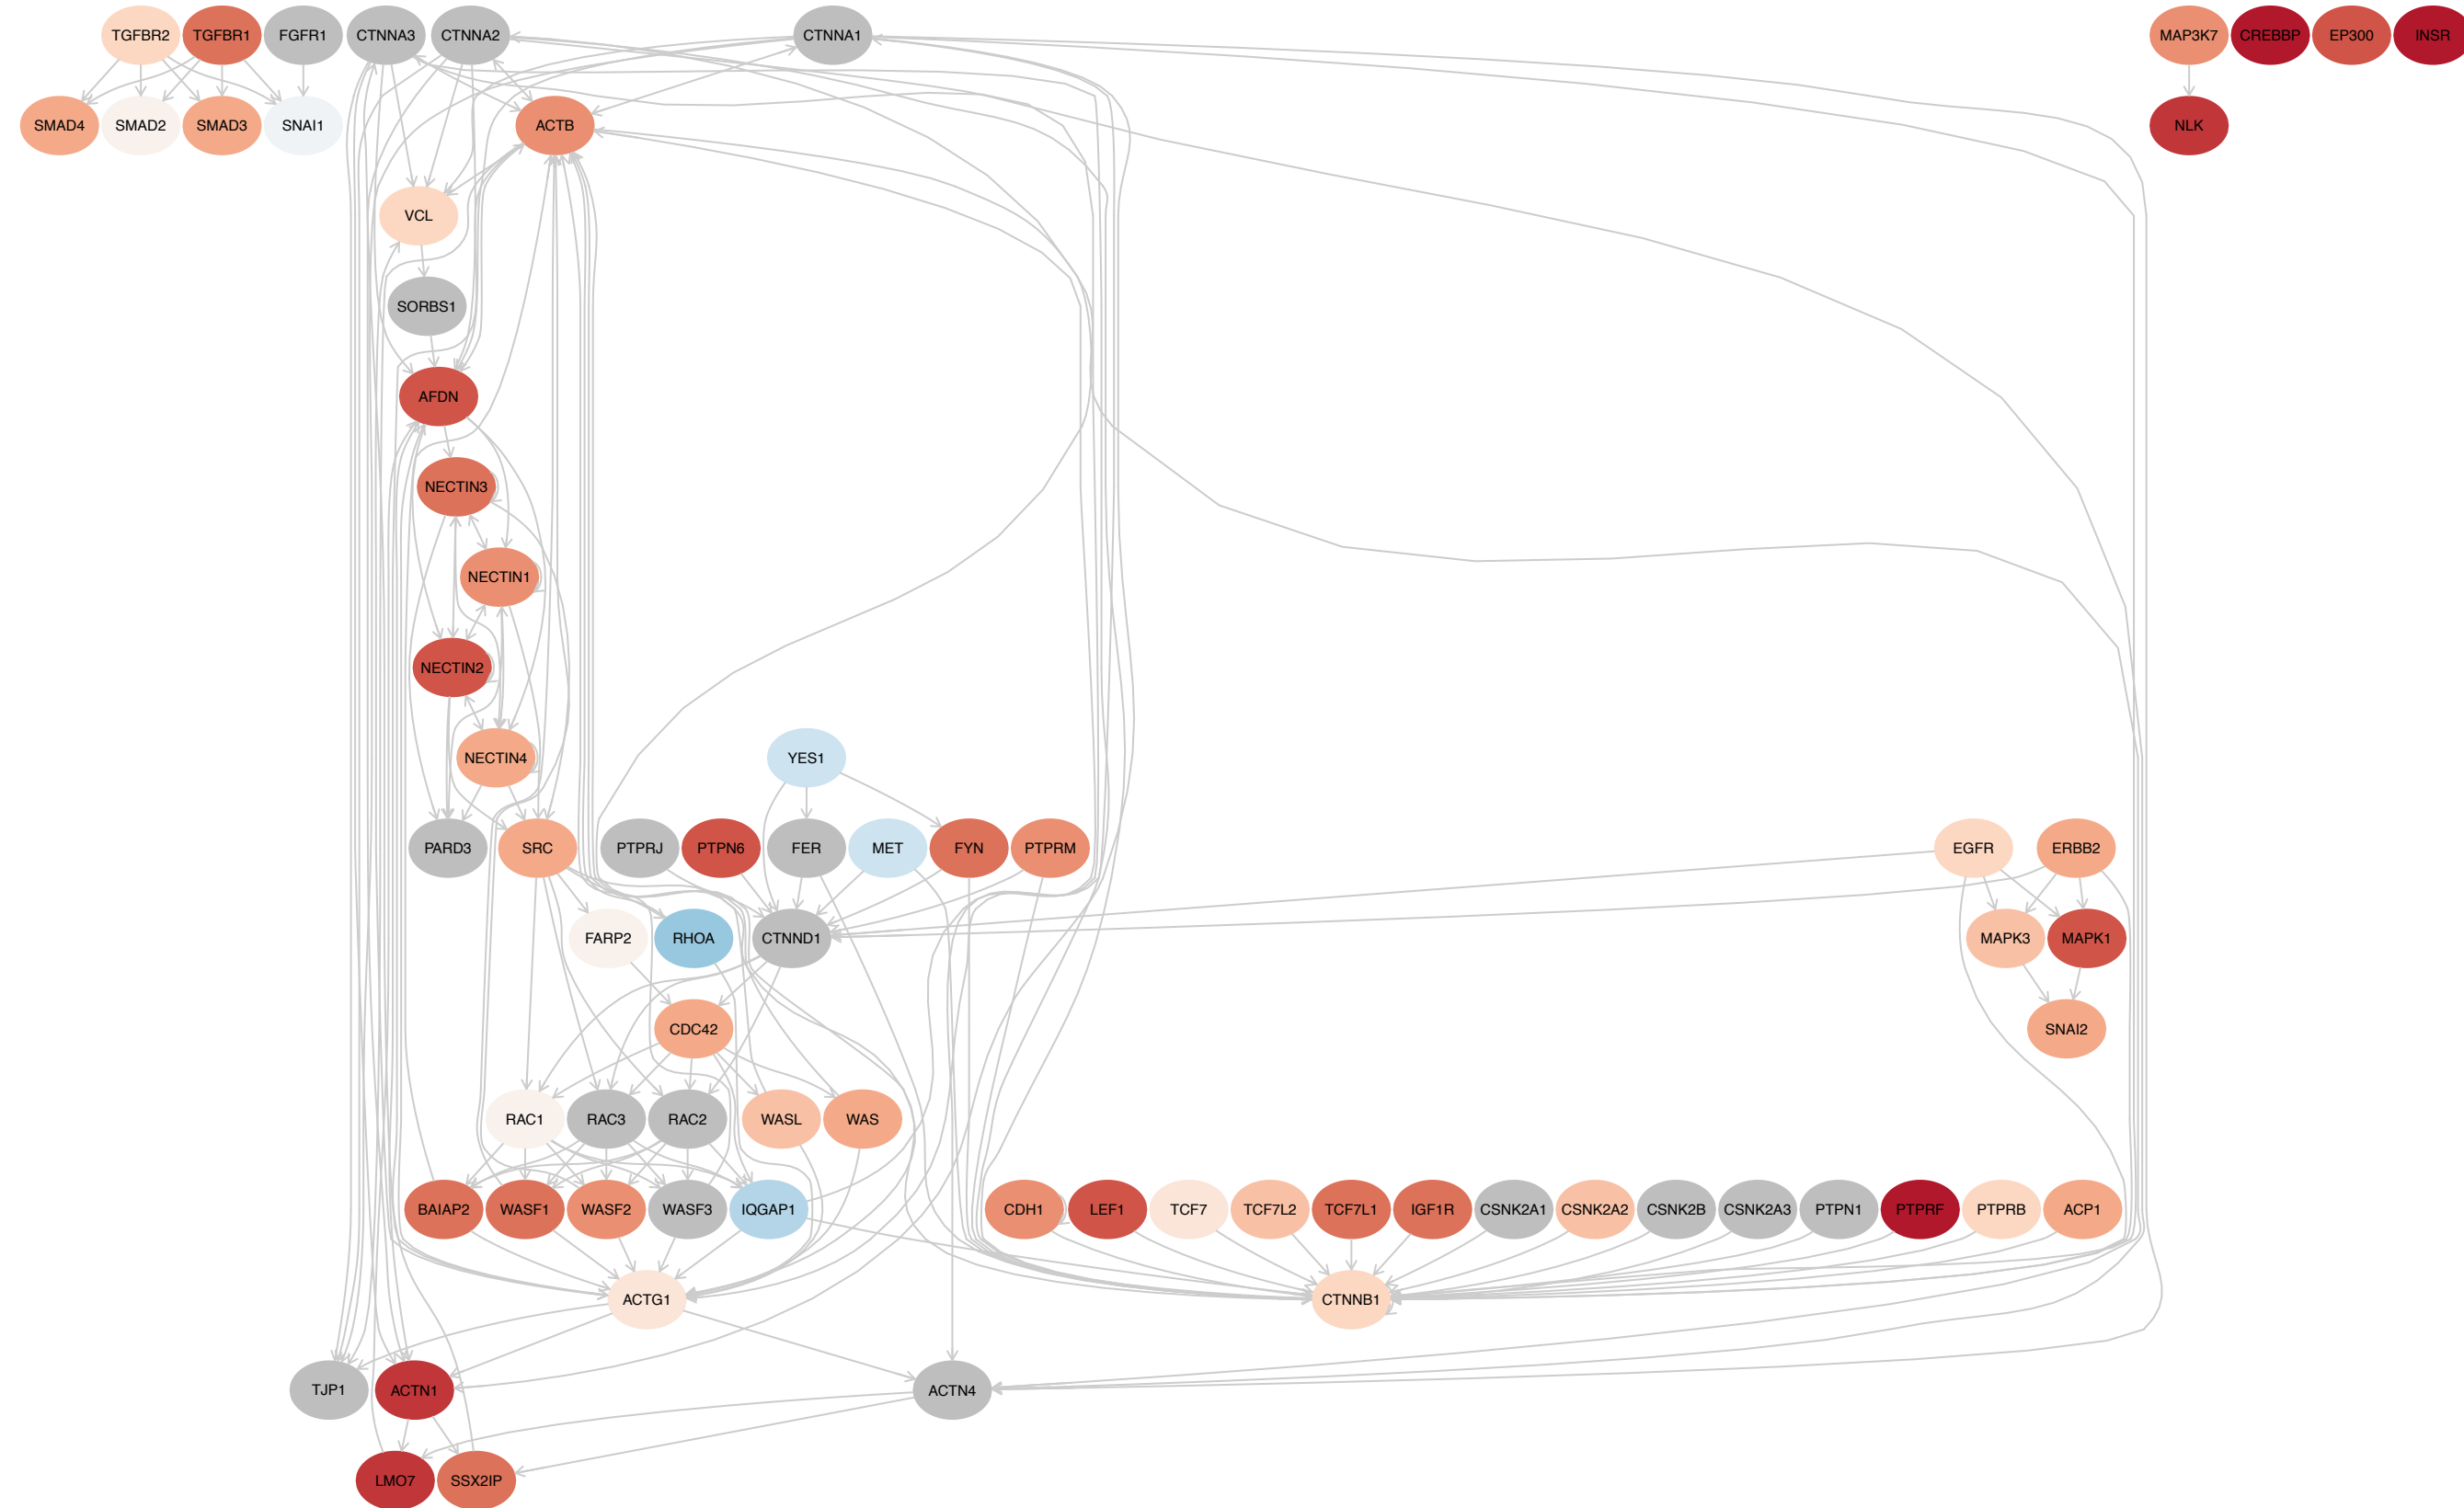





# Development

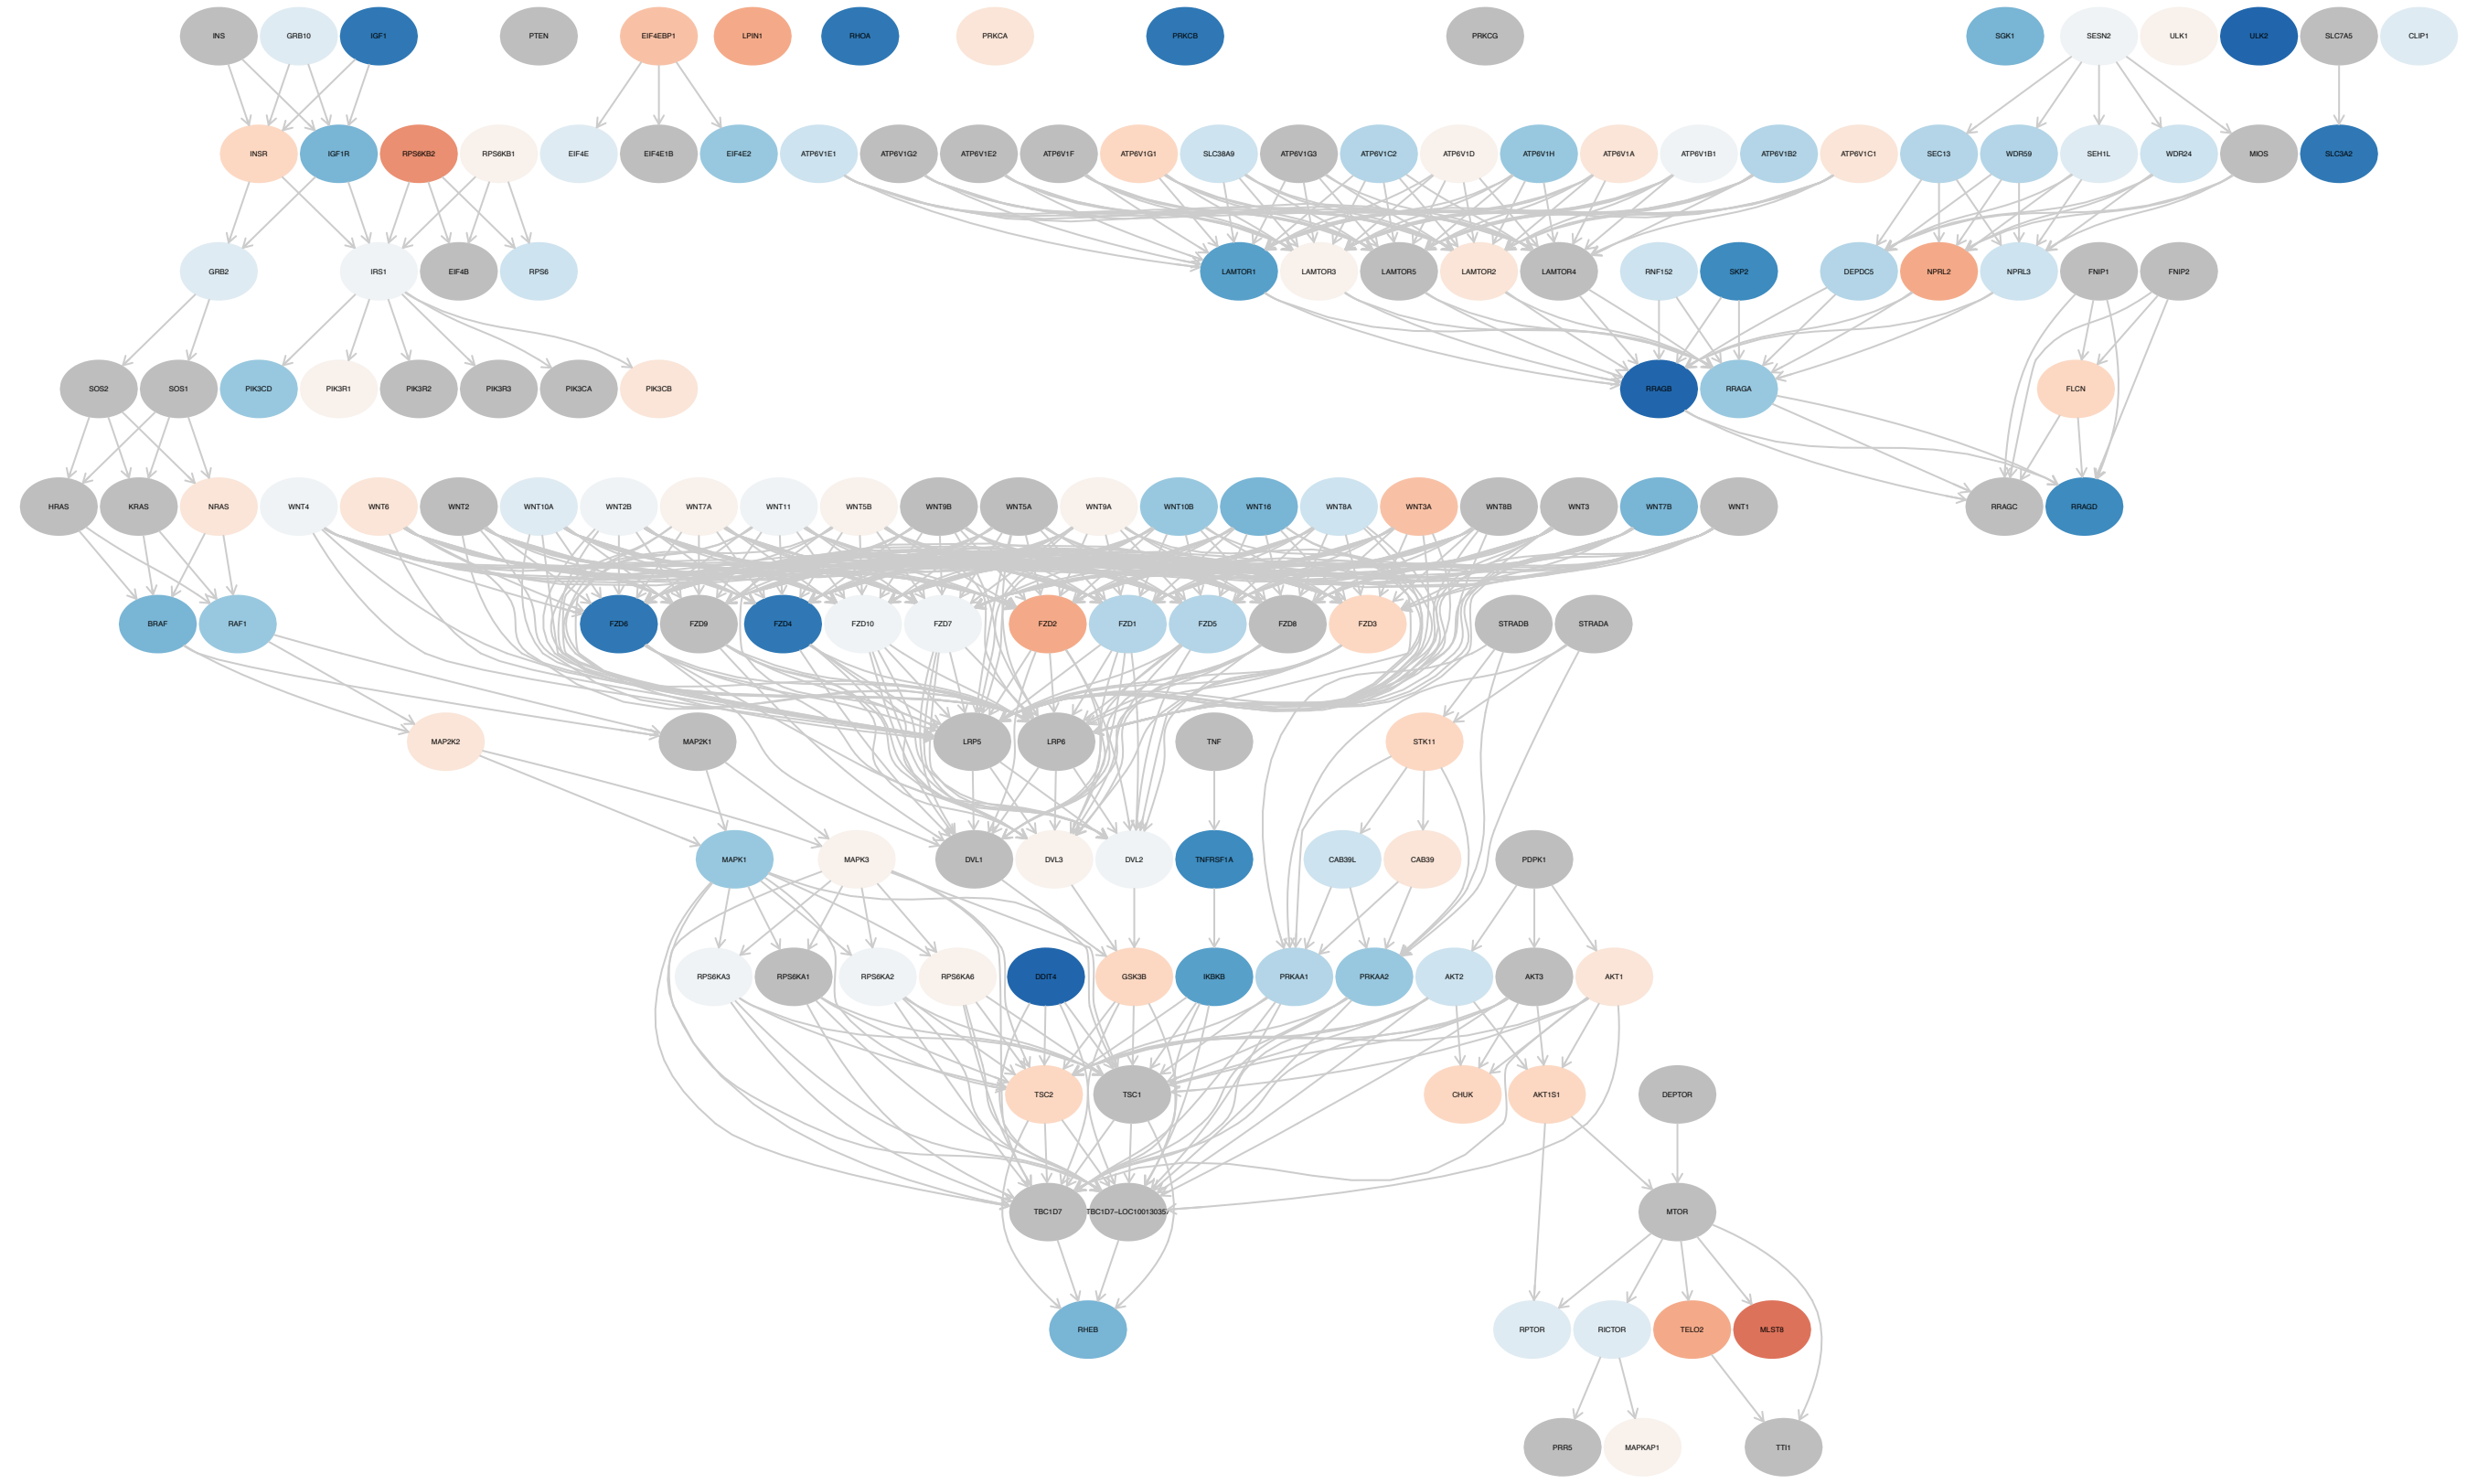

# mTOR signaling pathway

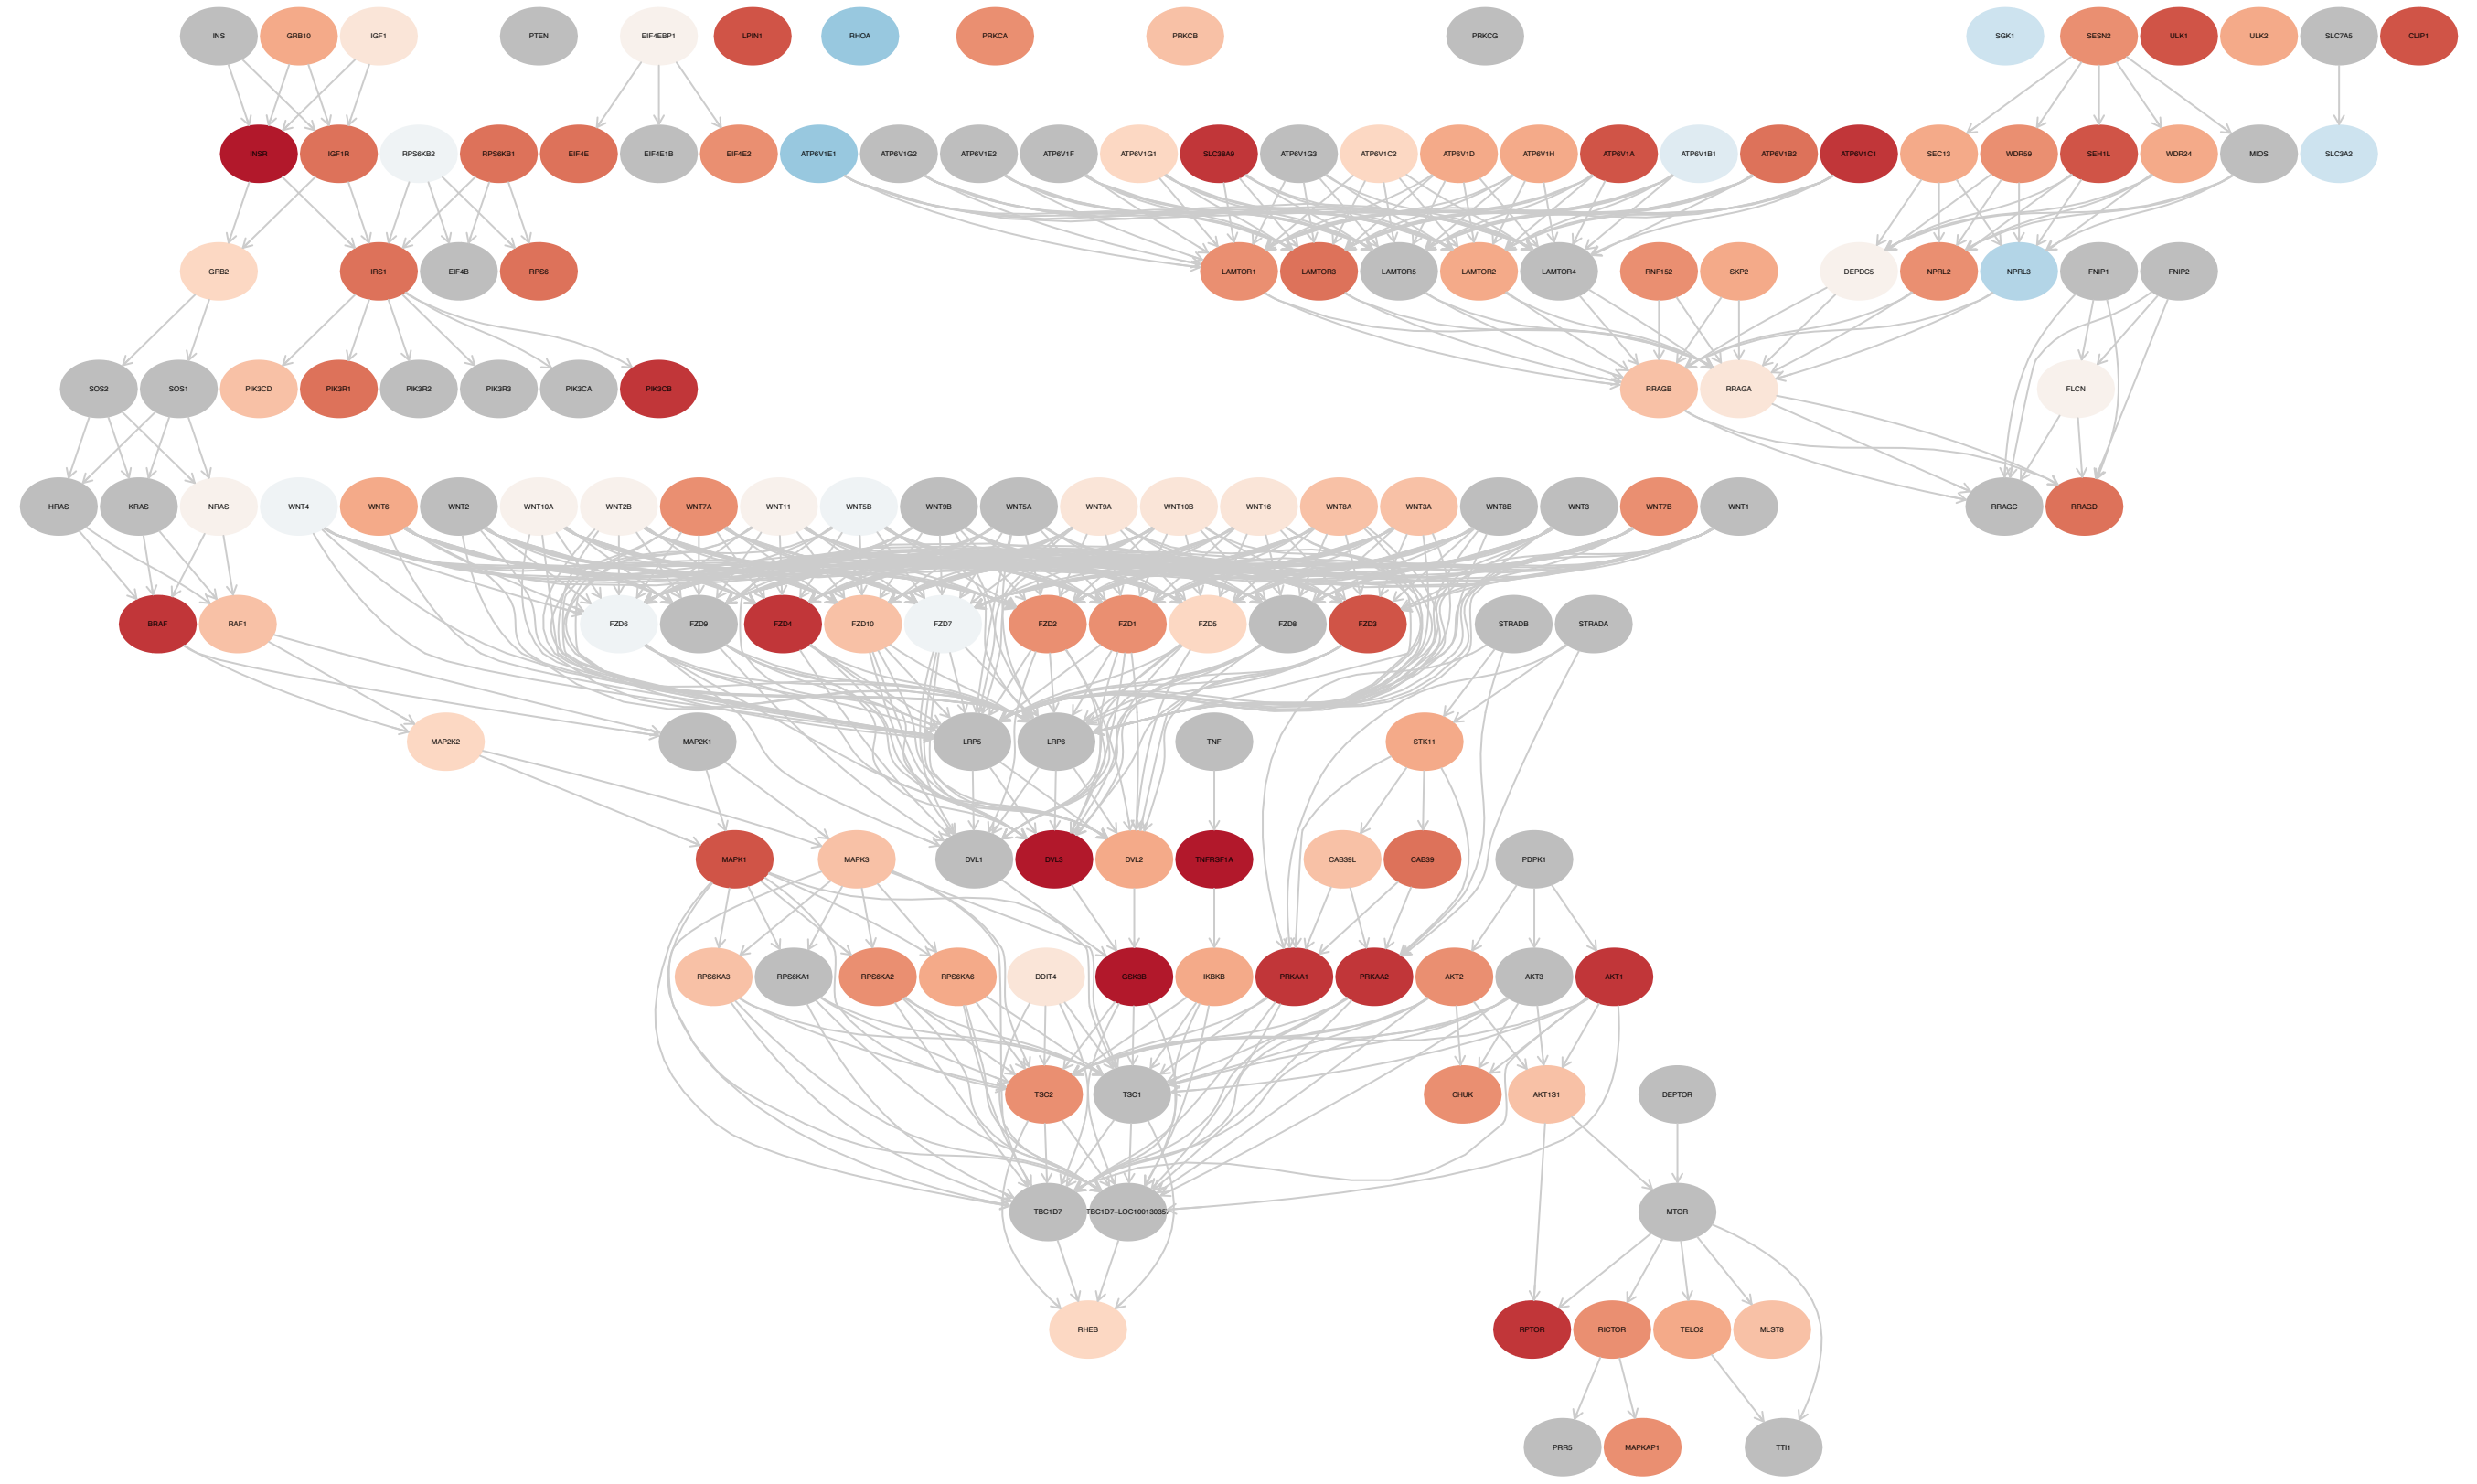

# Development

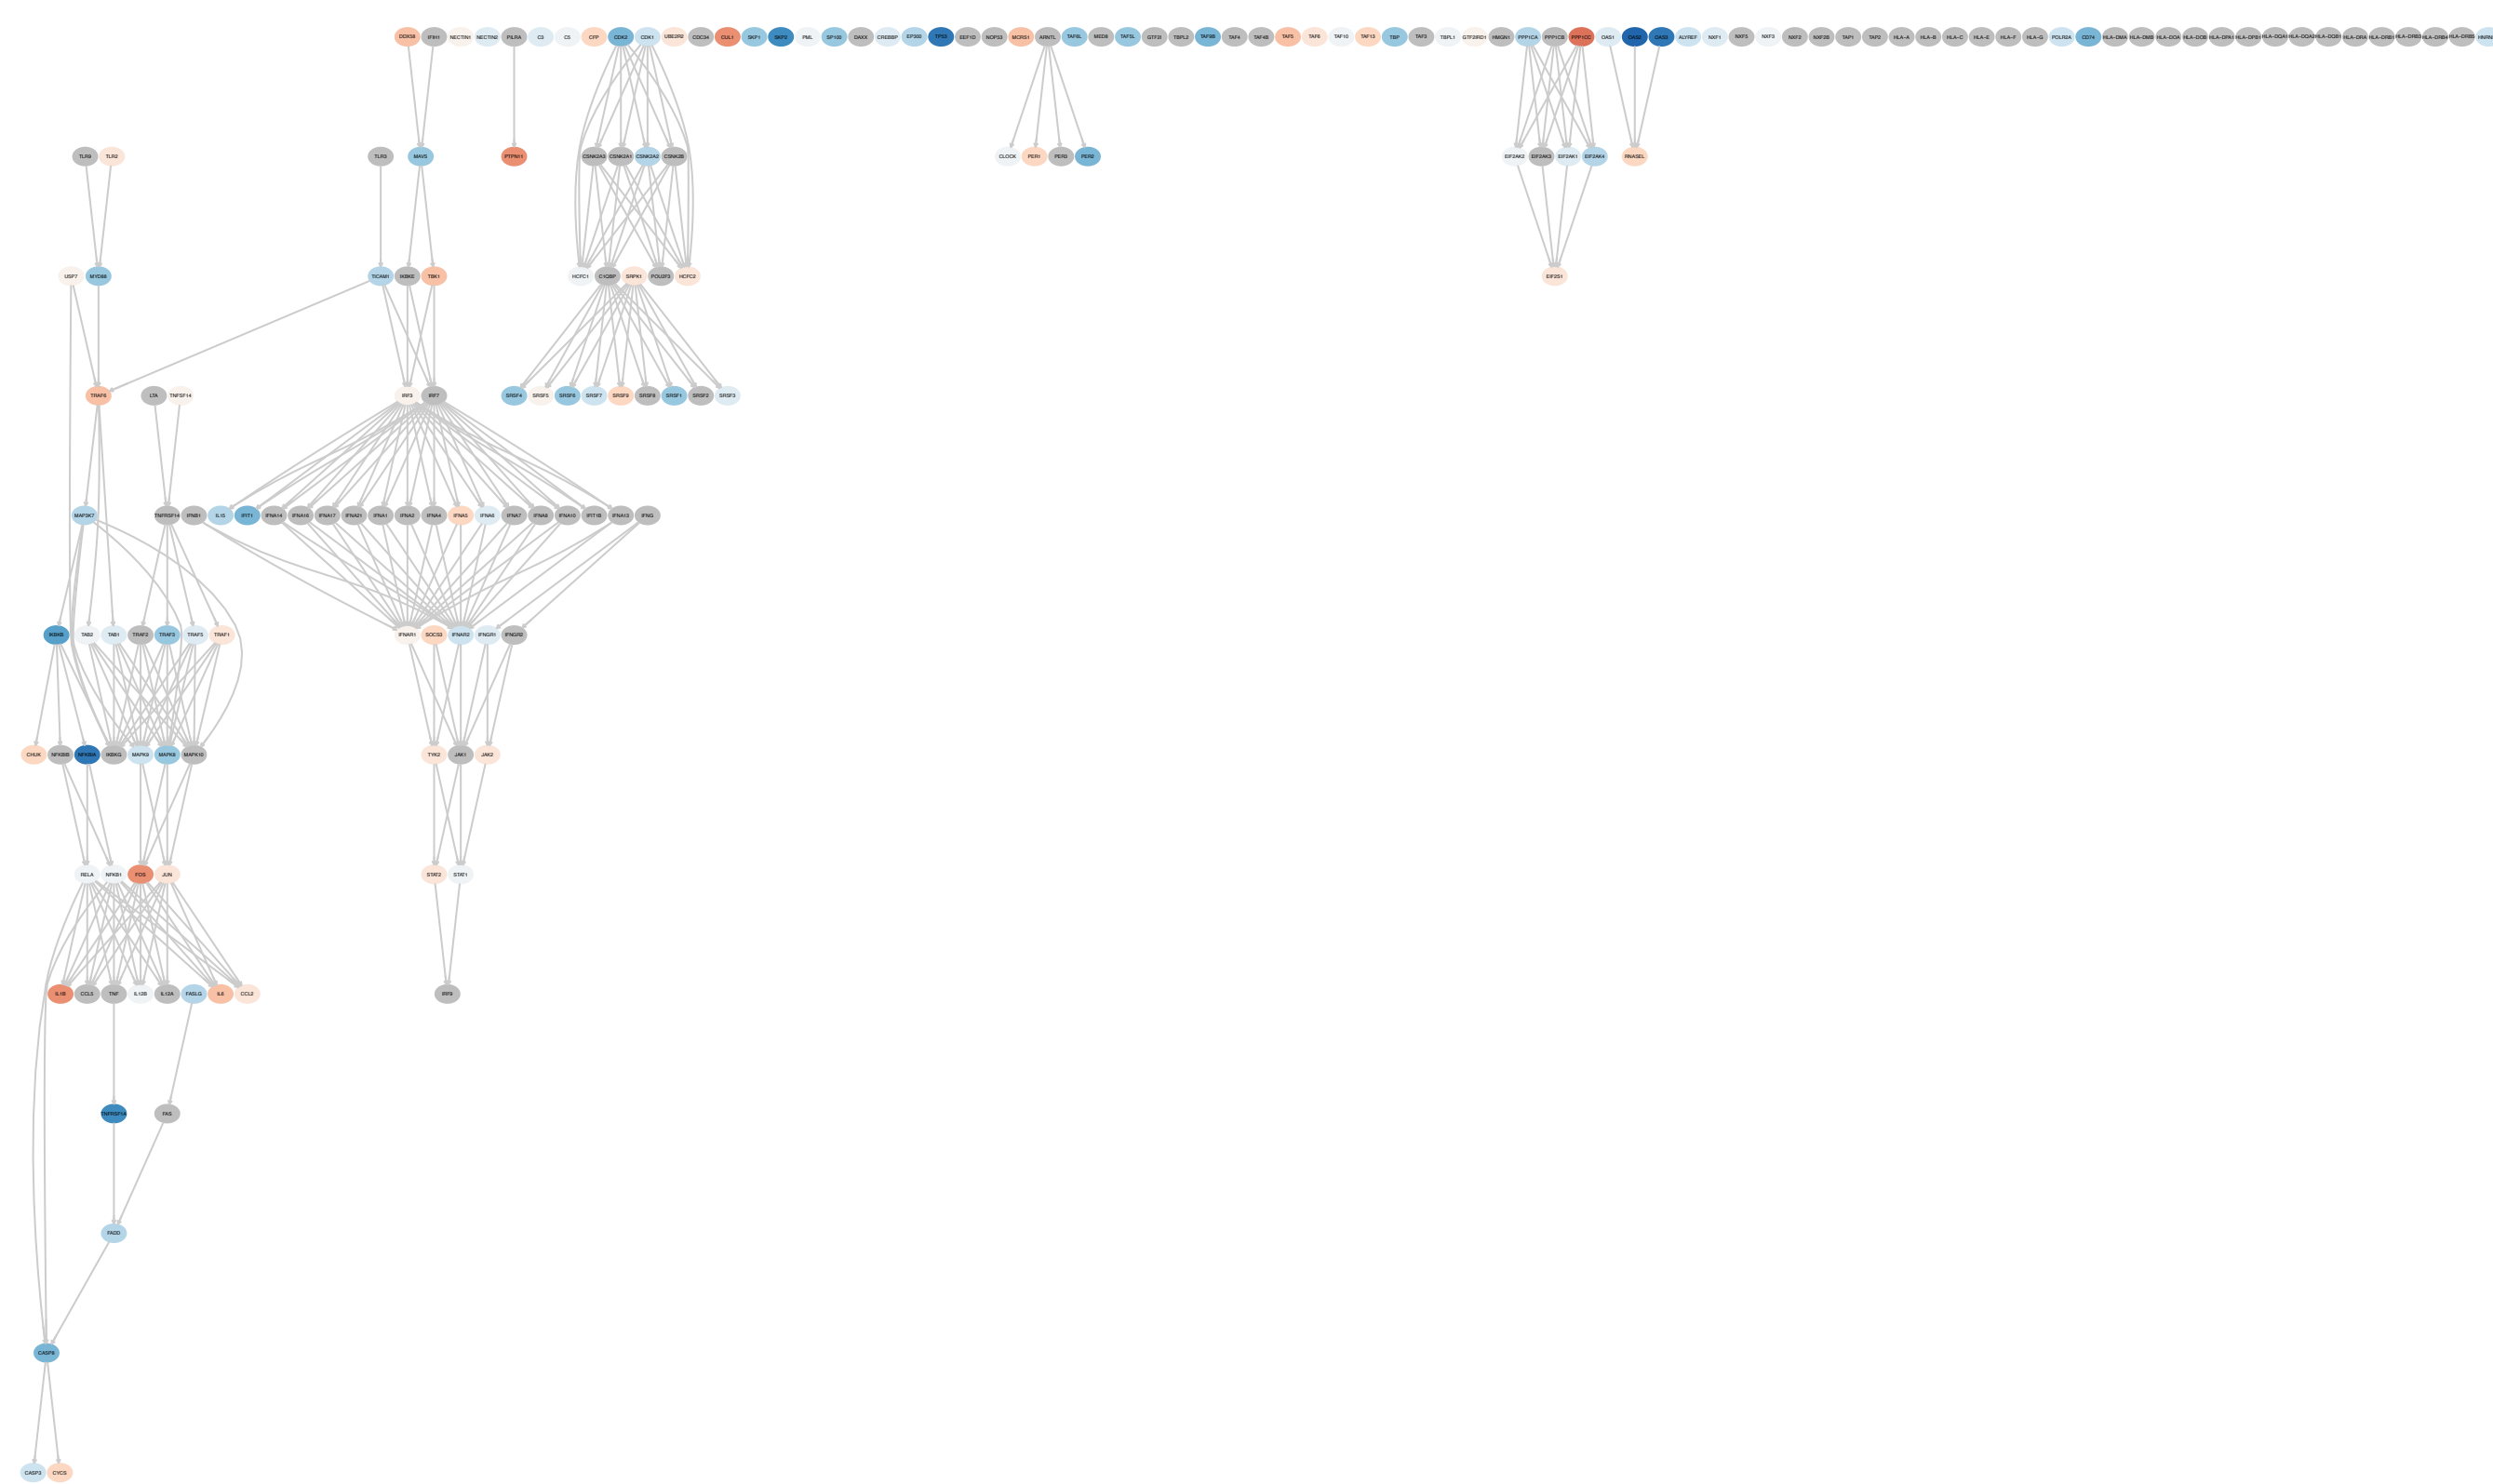

# Herpes simplex infection

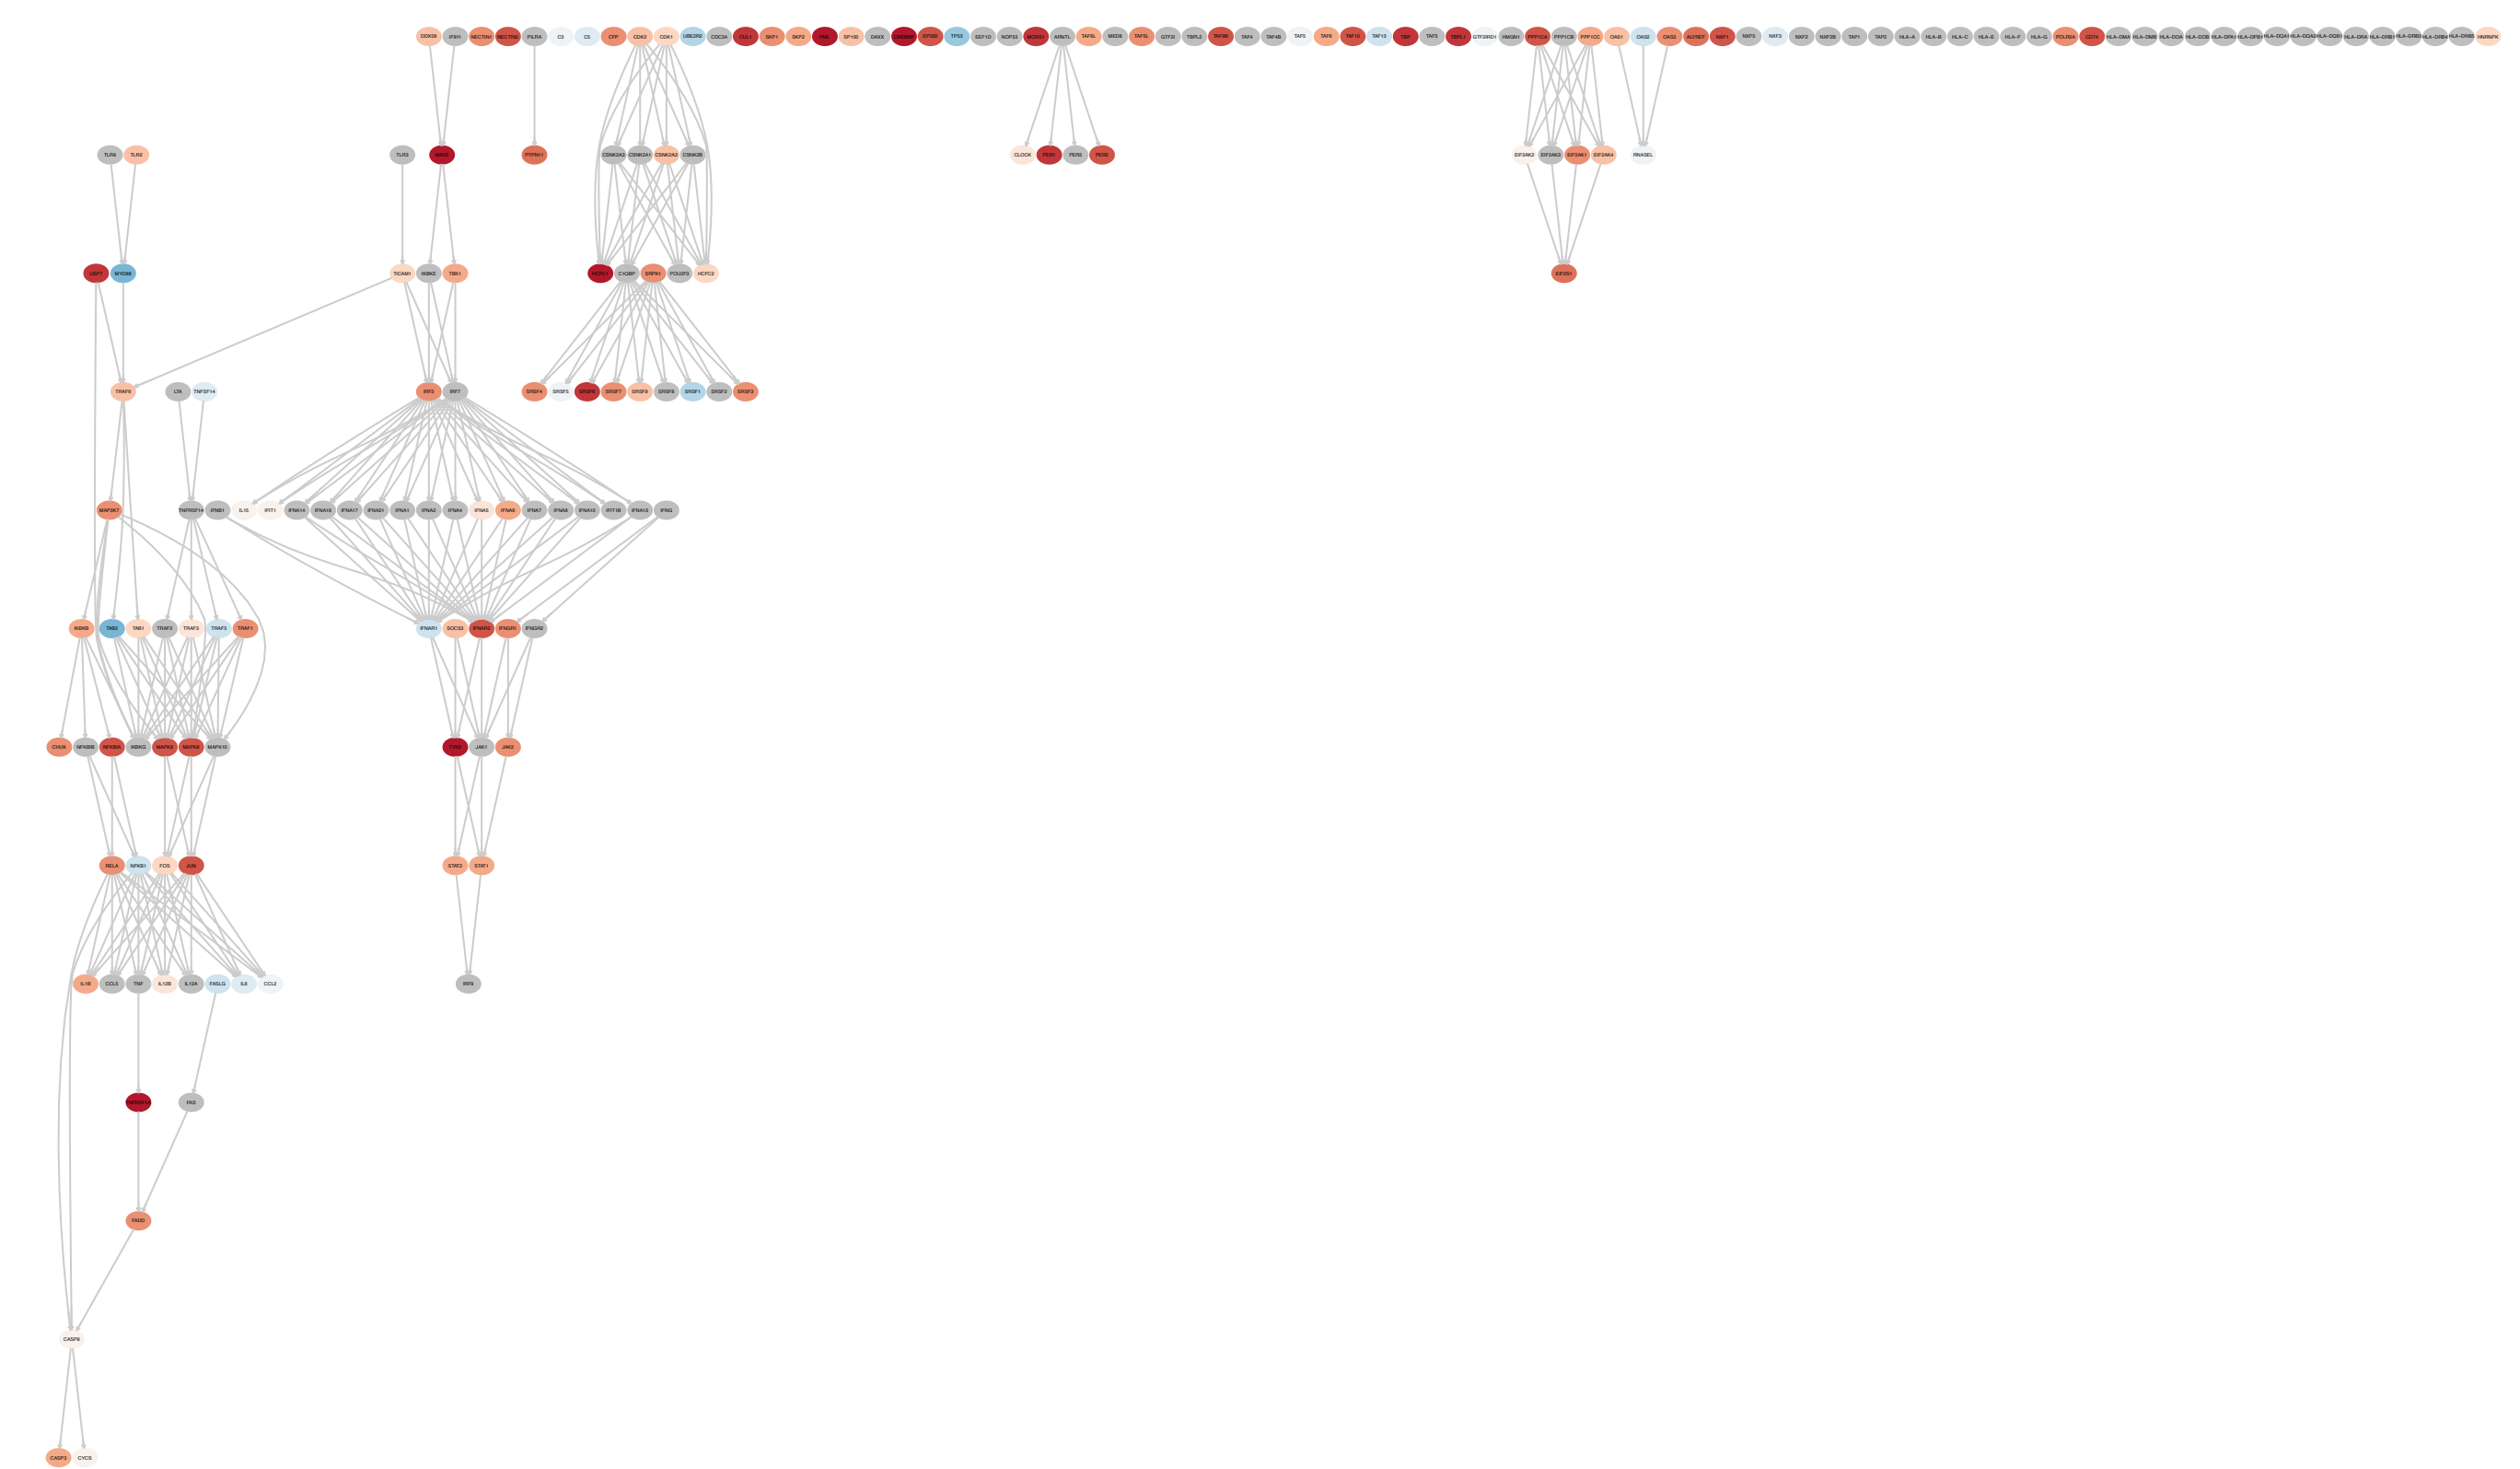

# Ageing

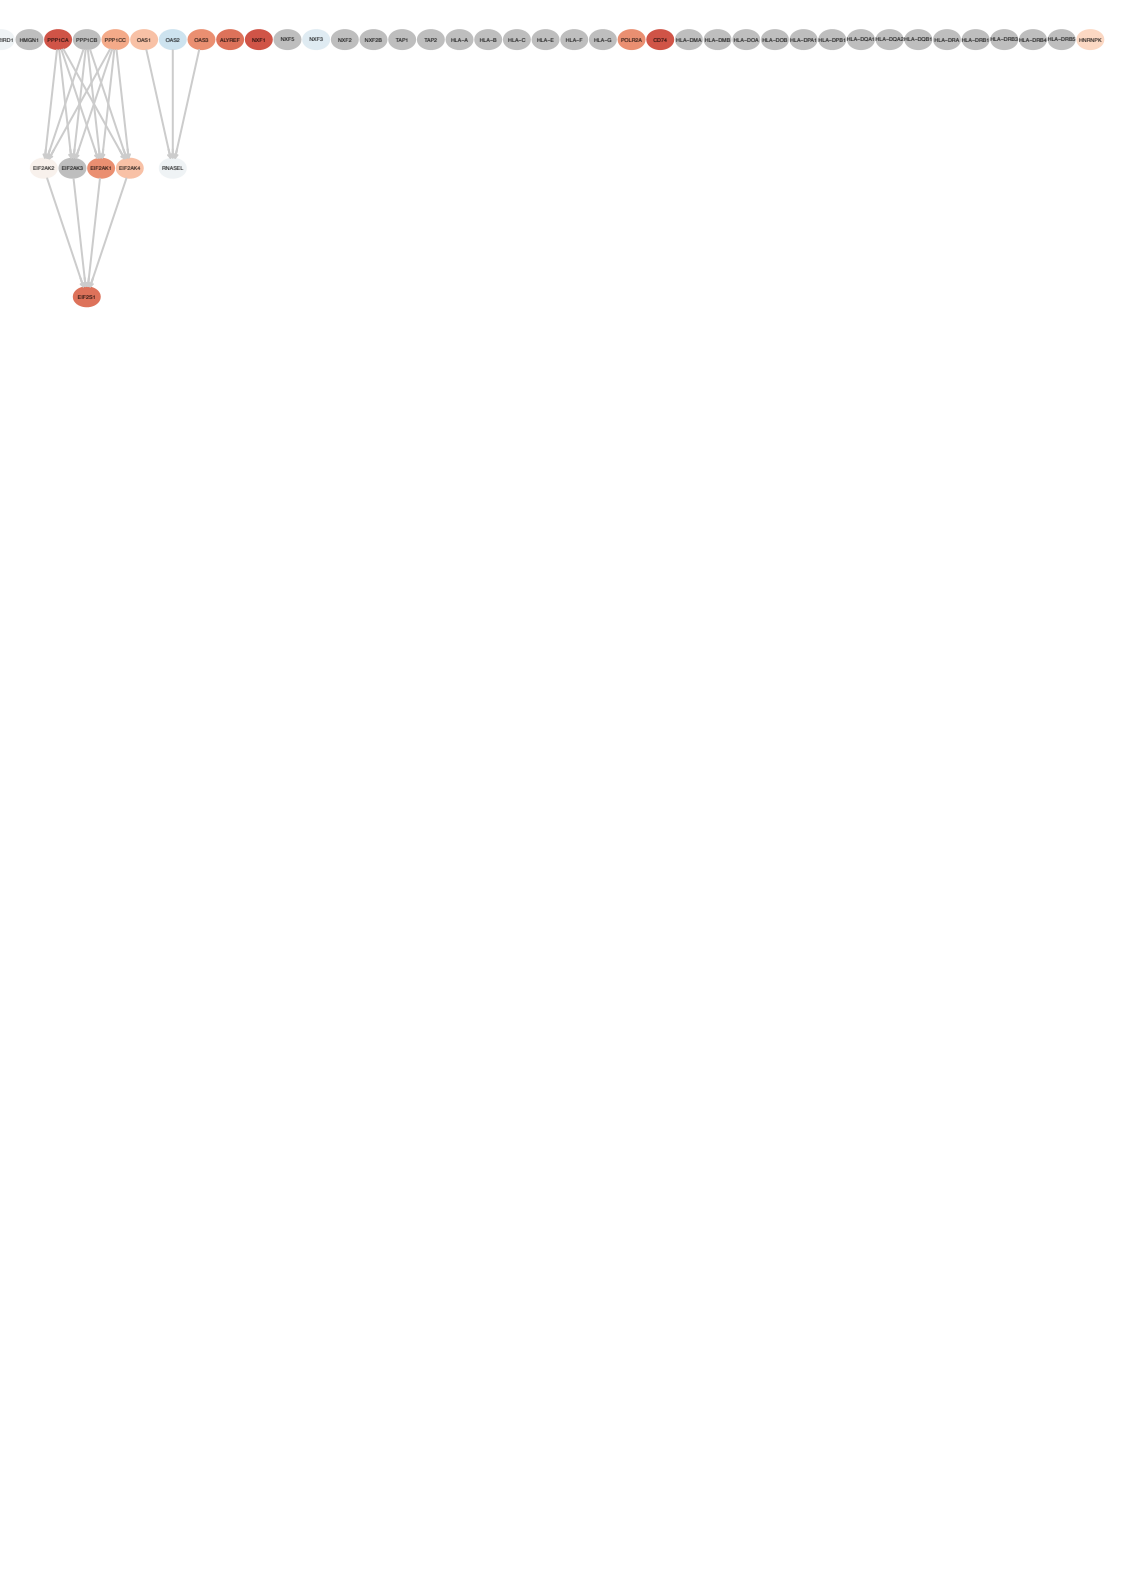





## Development

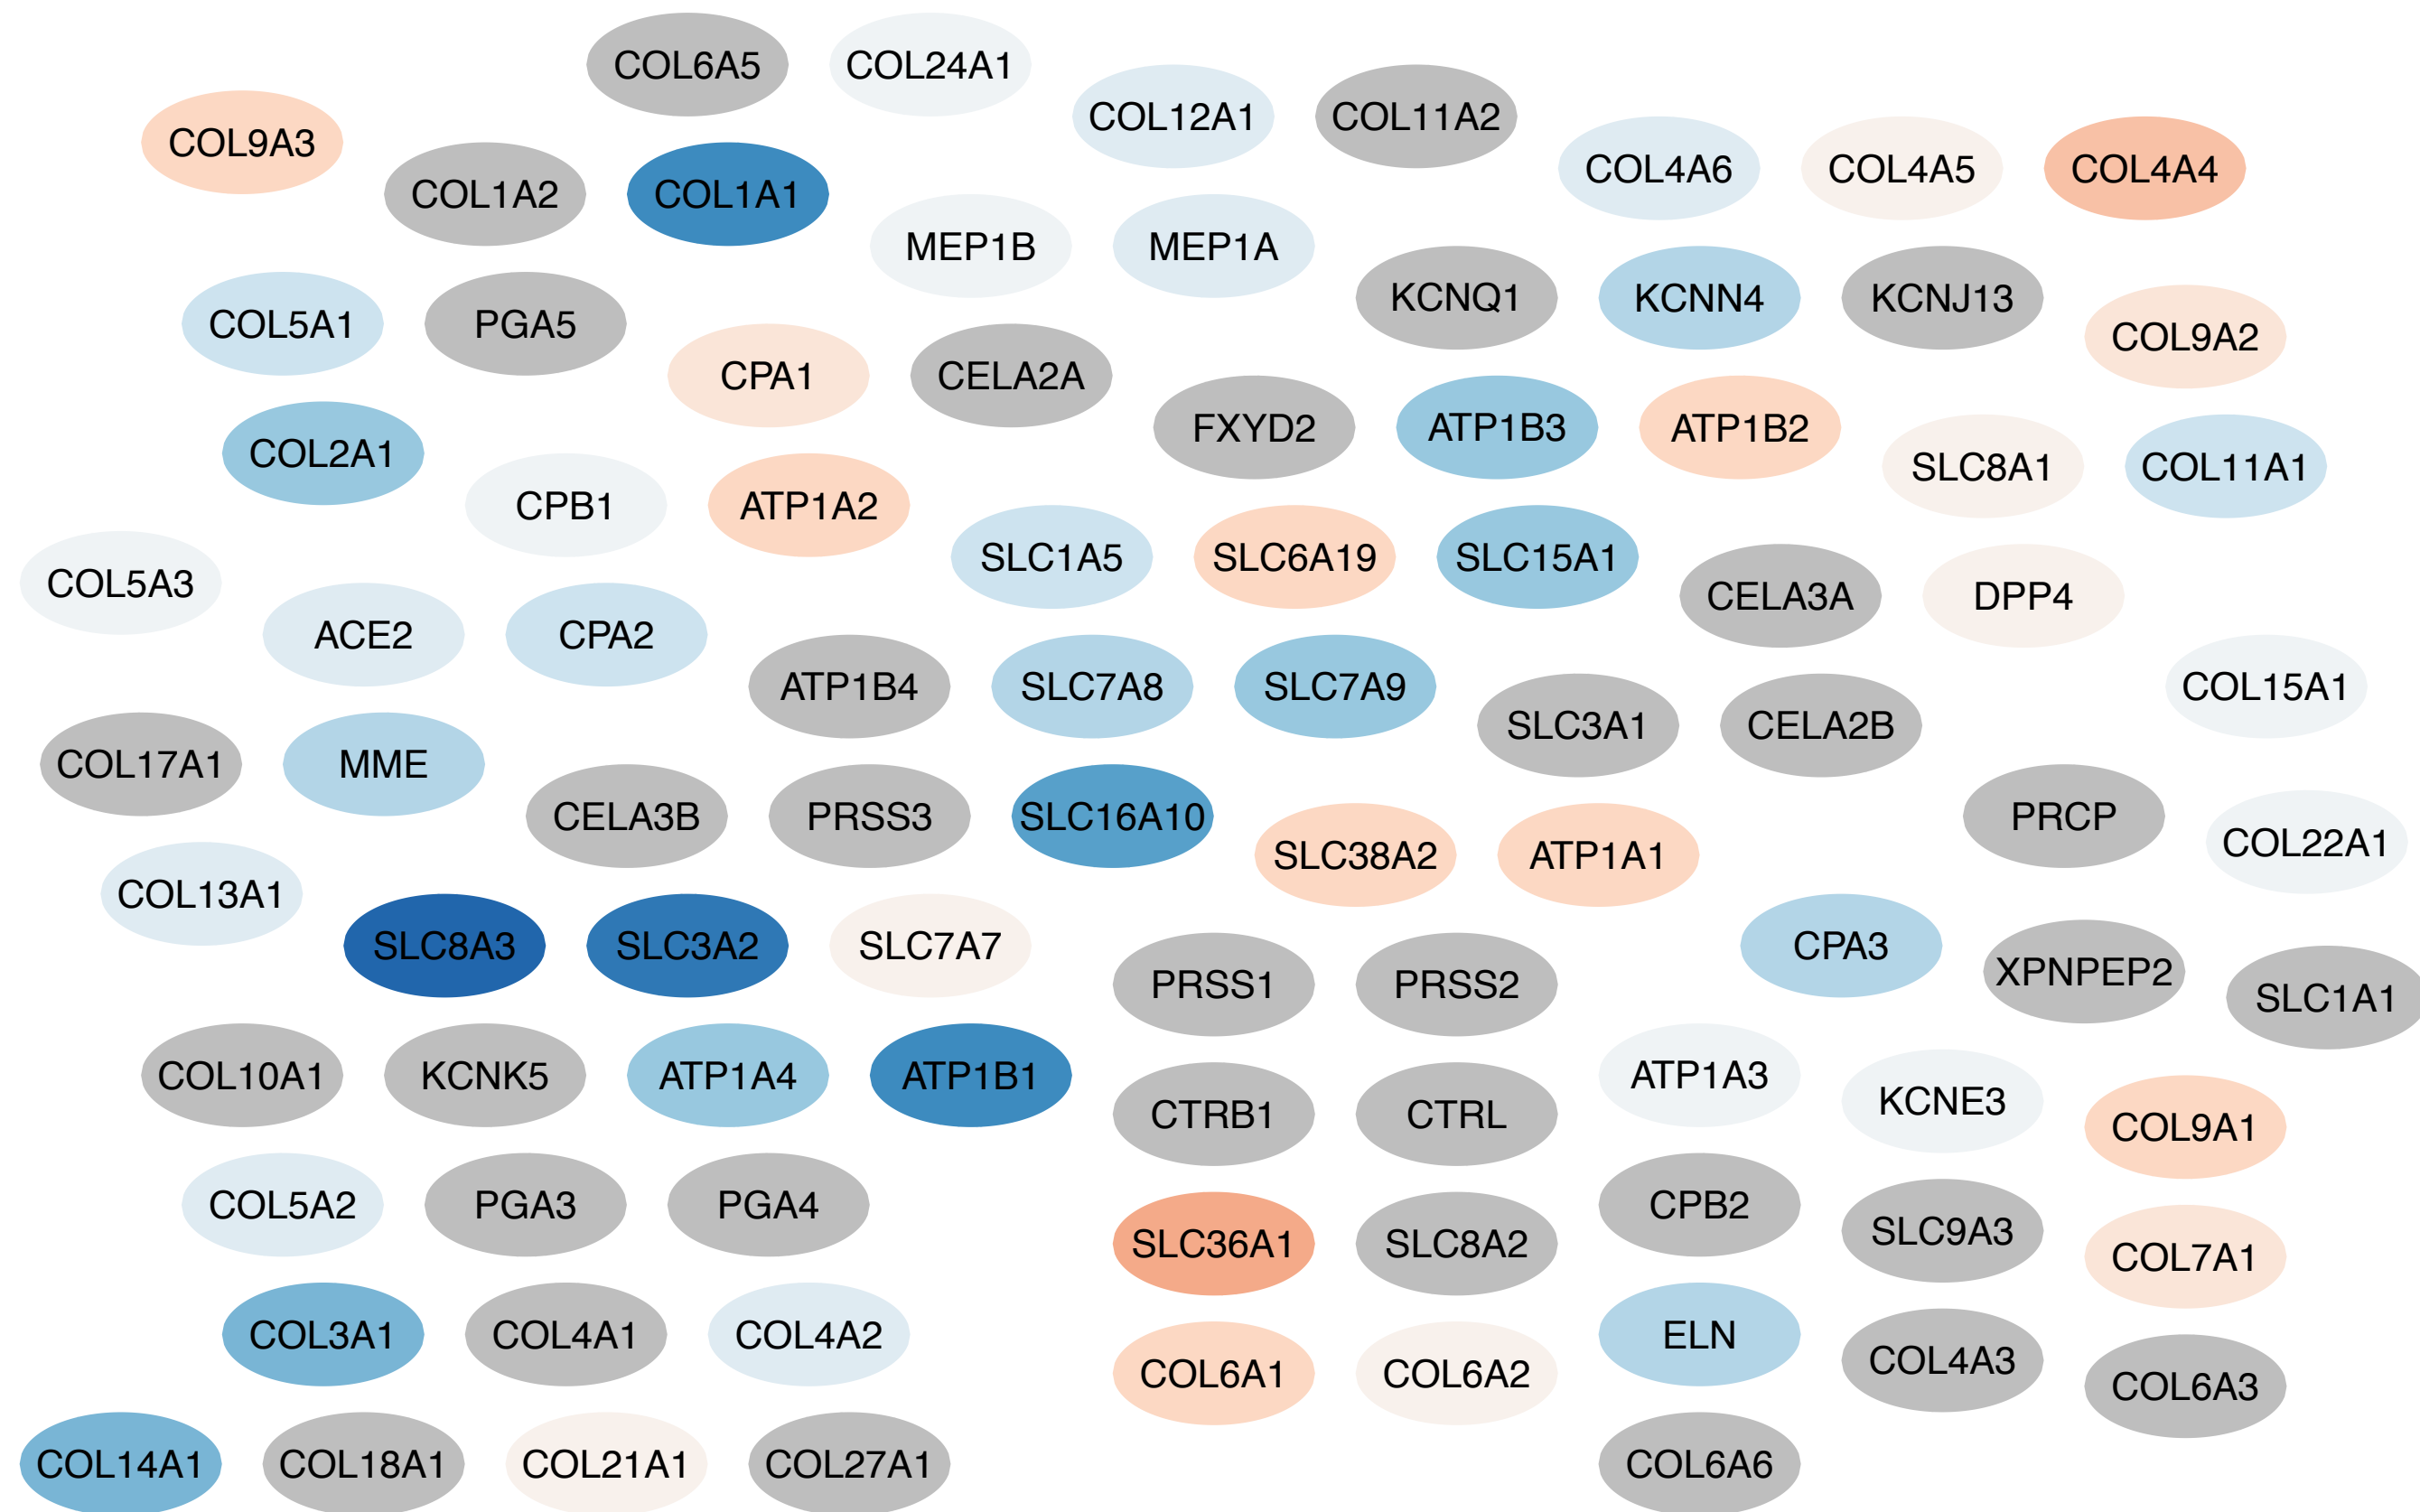

## Protein digestion and absorption

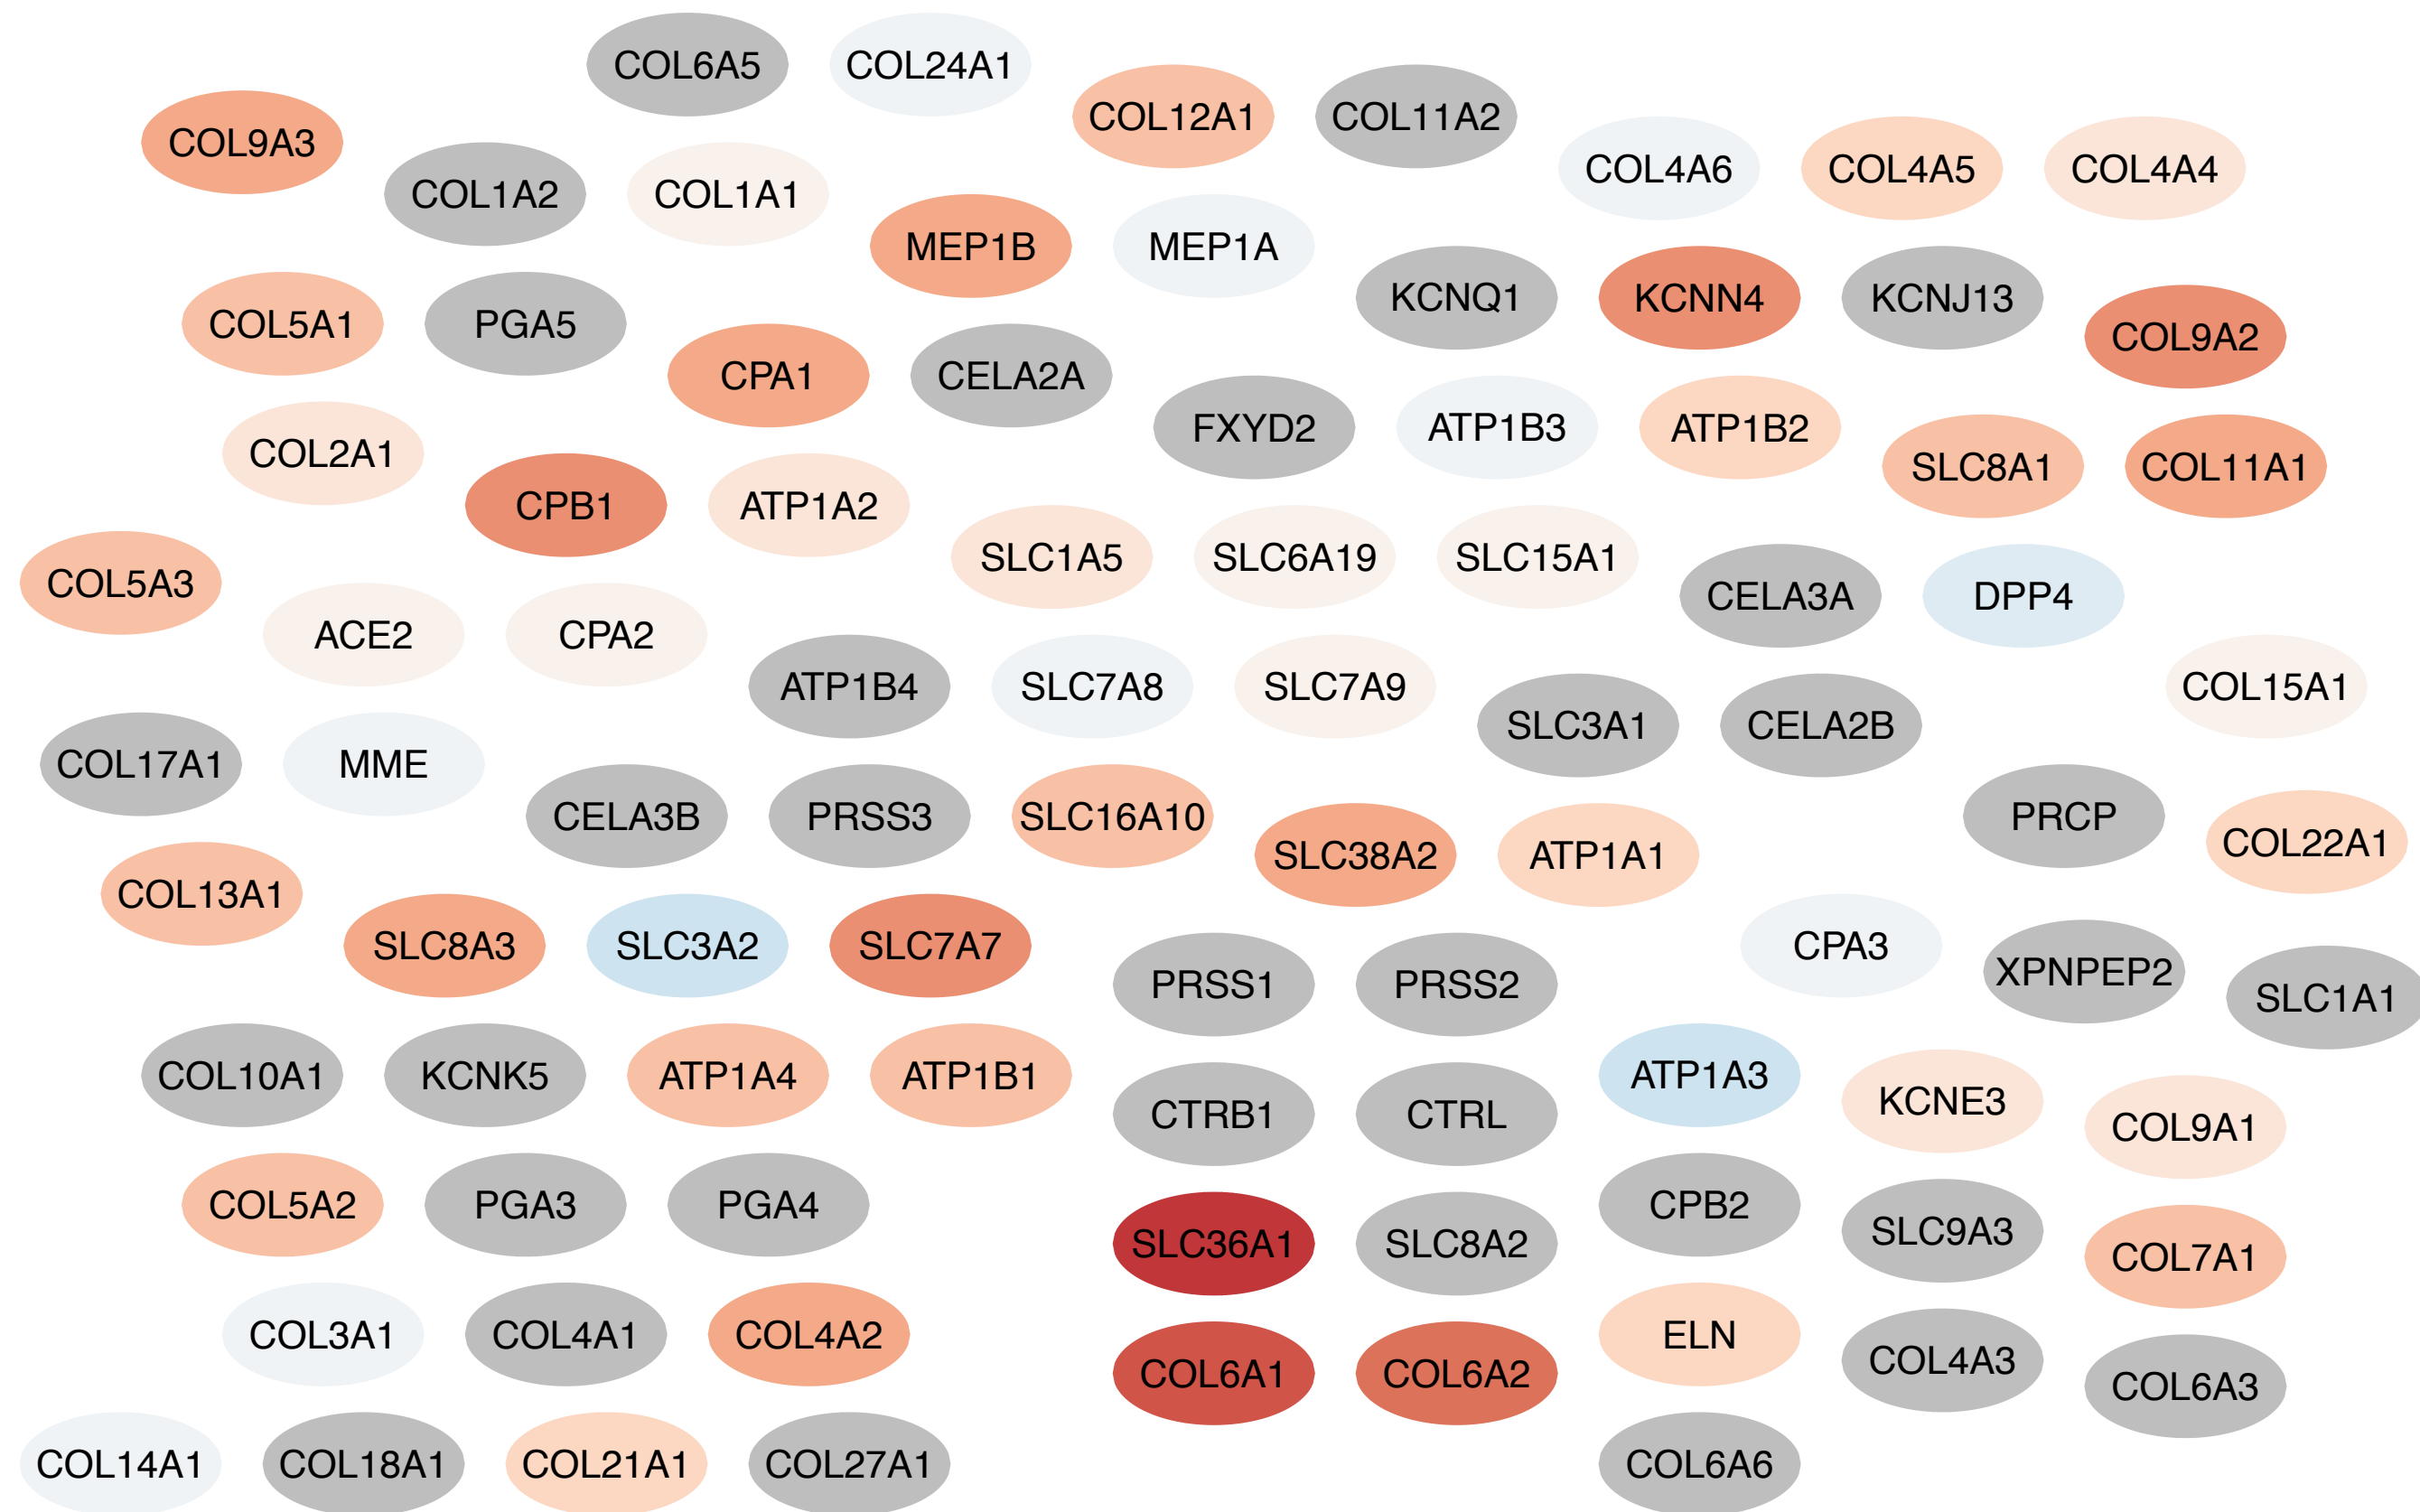

## Ageing





## Development

## Primary immunodeficiency

## Ageing

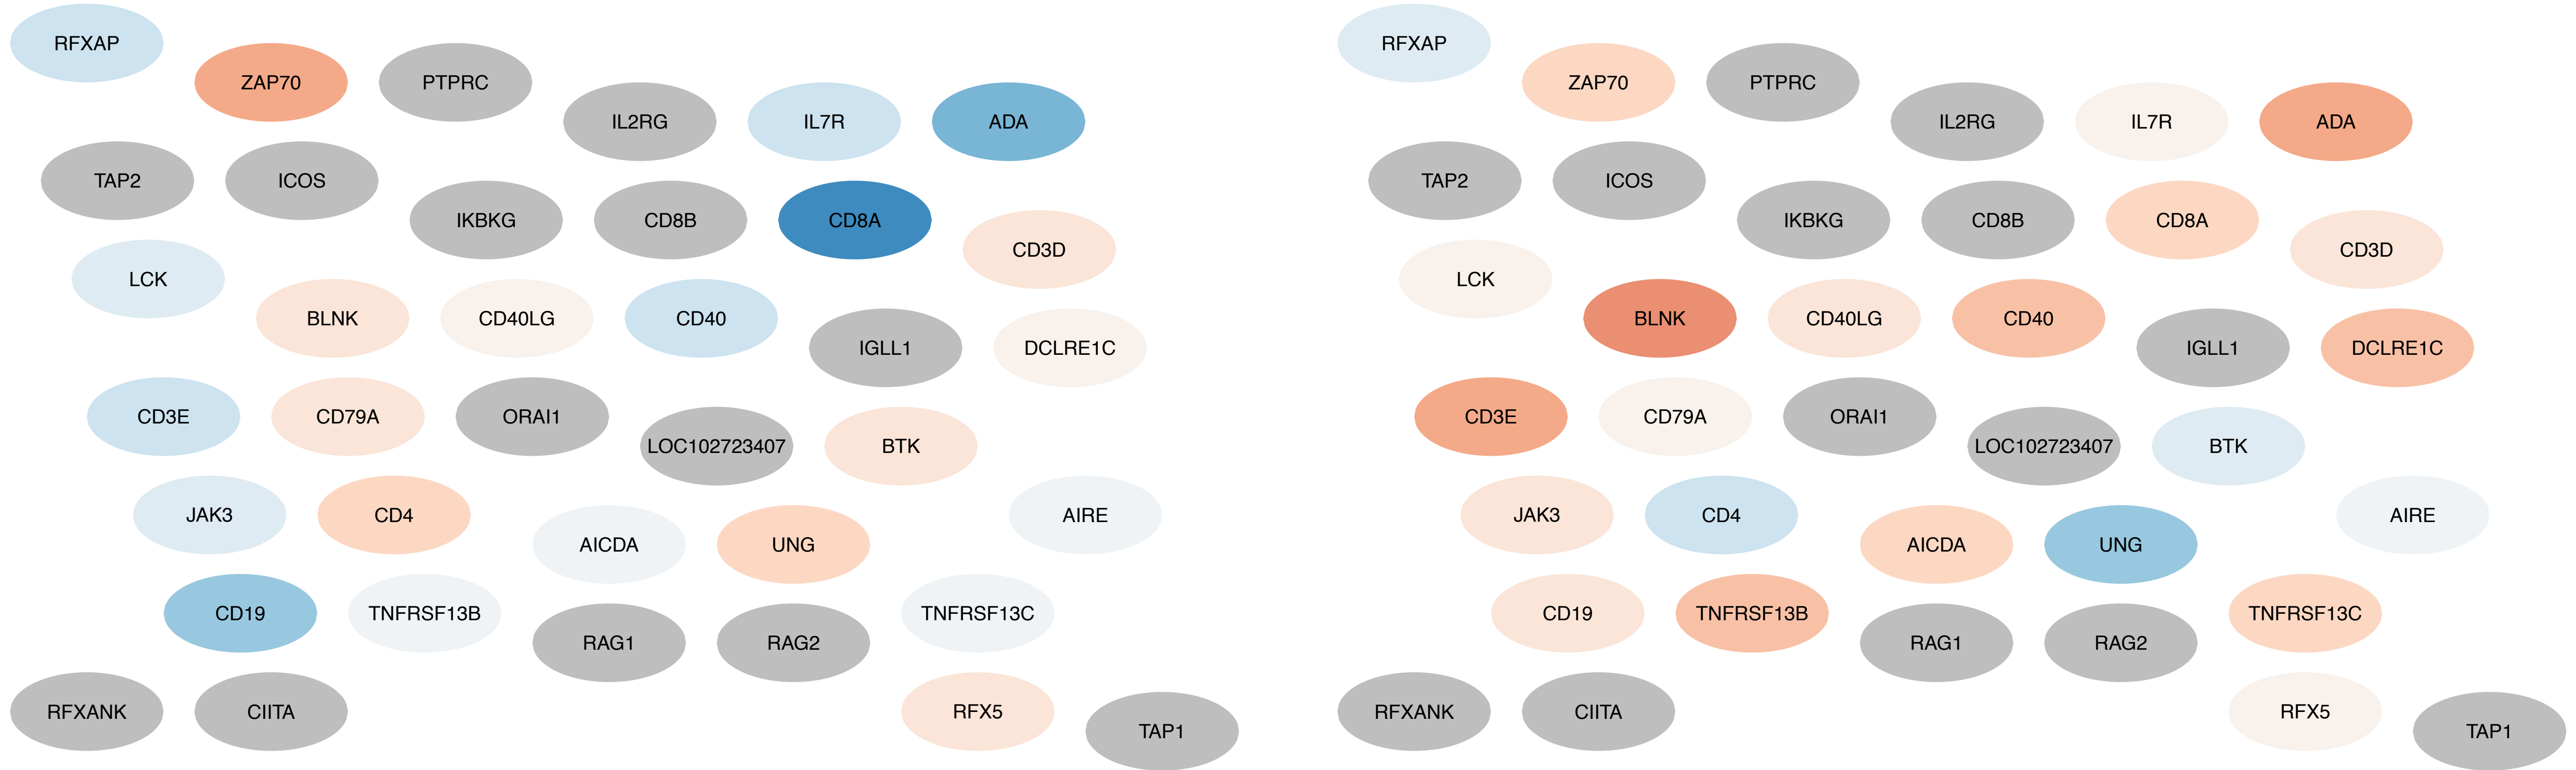

# Development

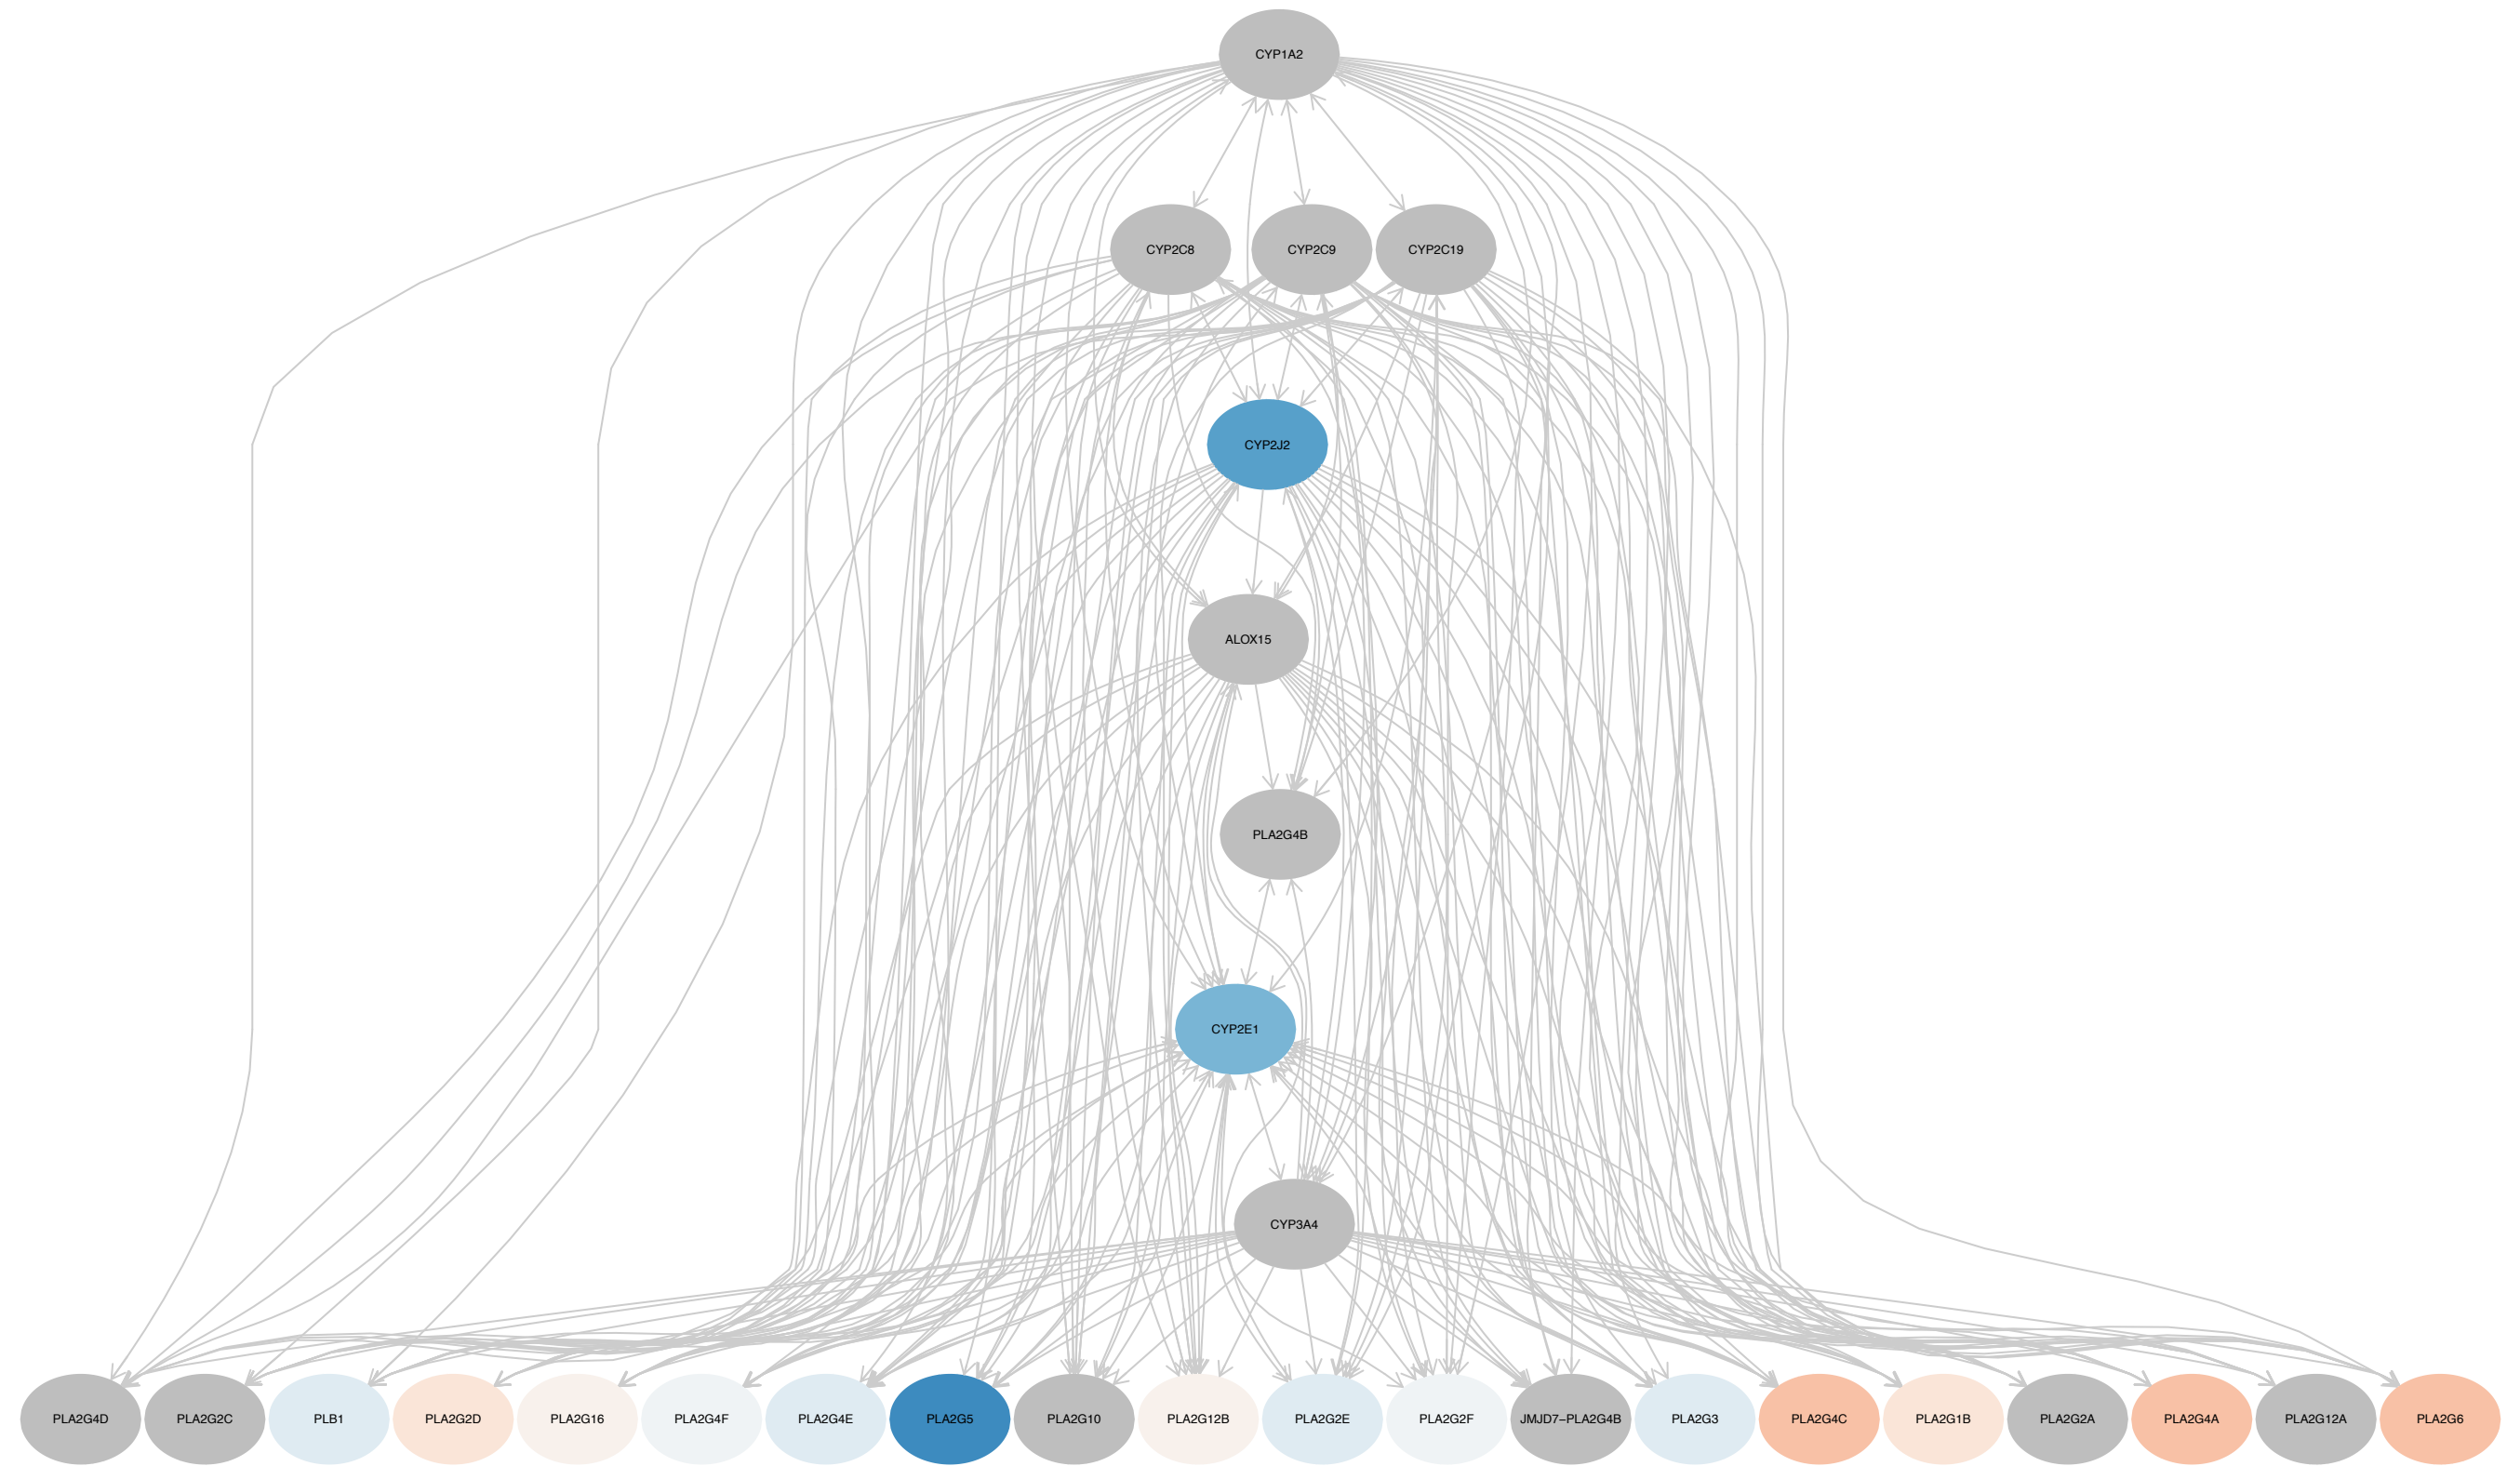

# Linoleic acid metabolism

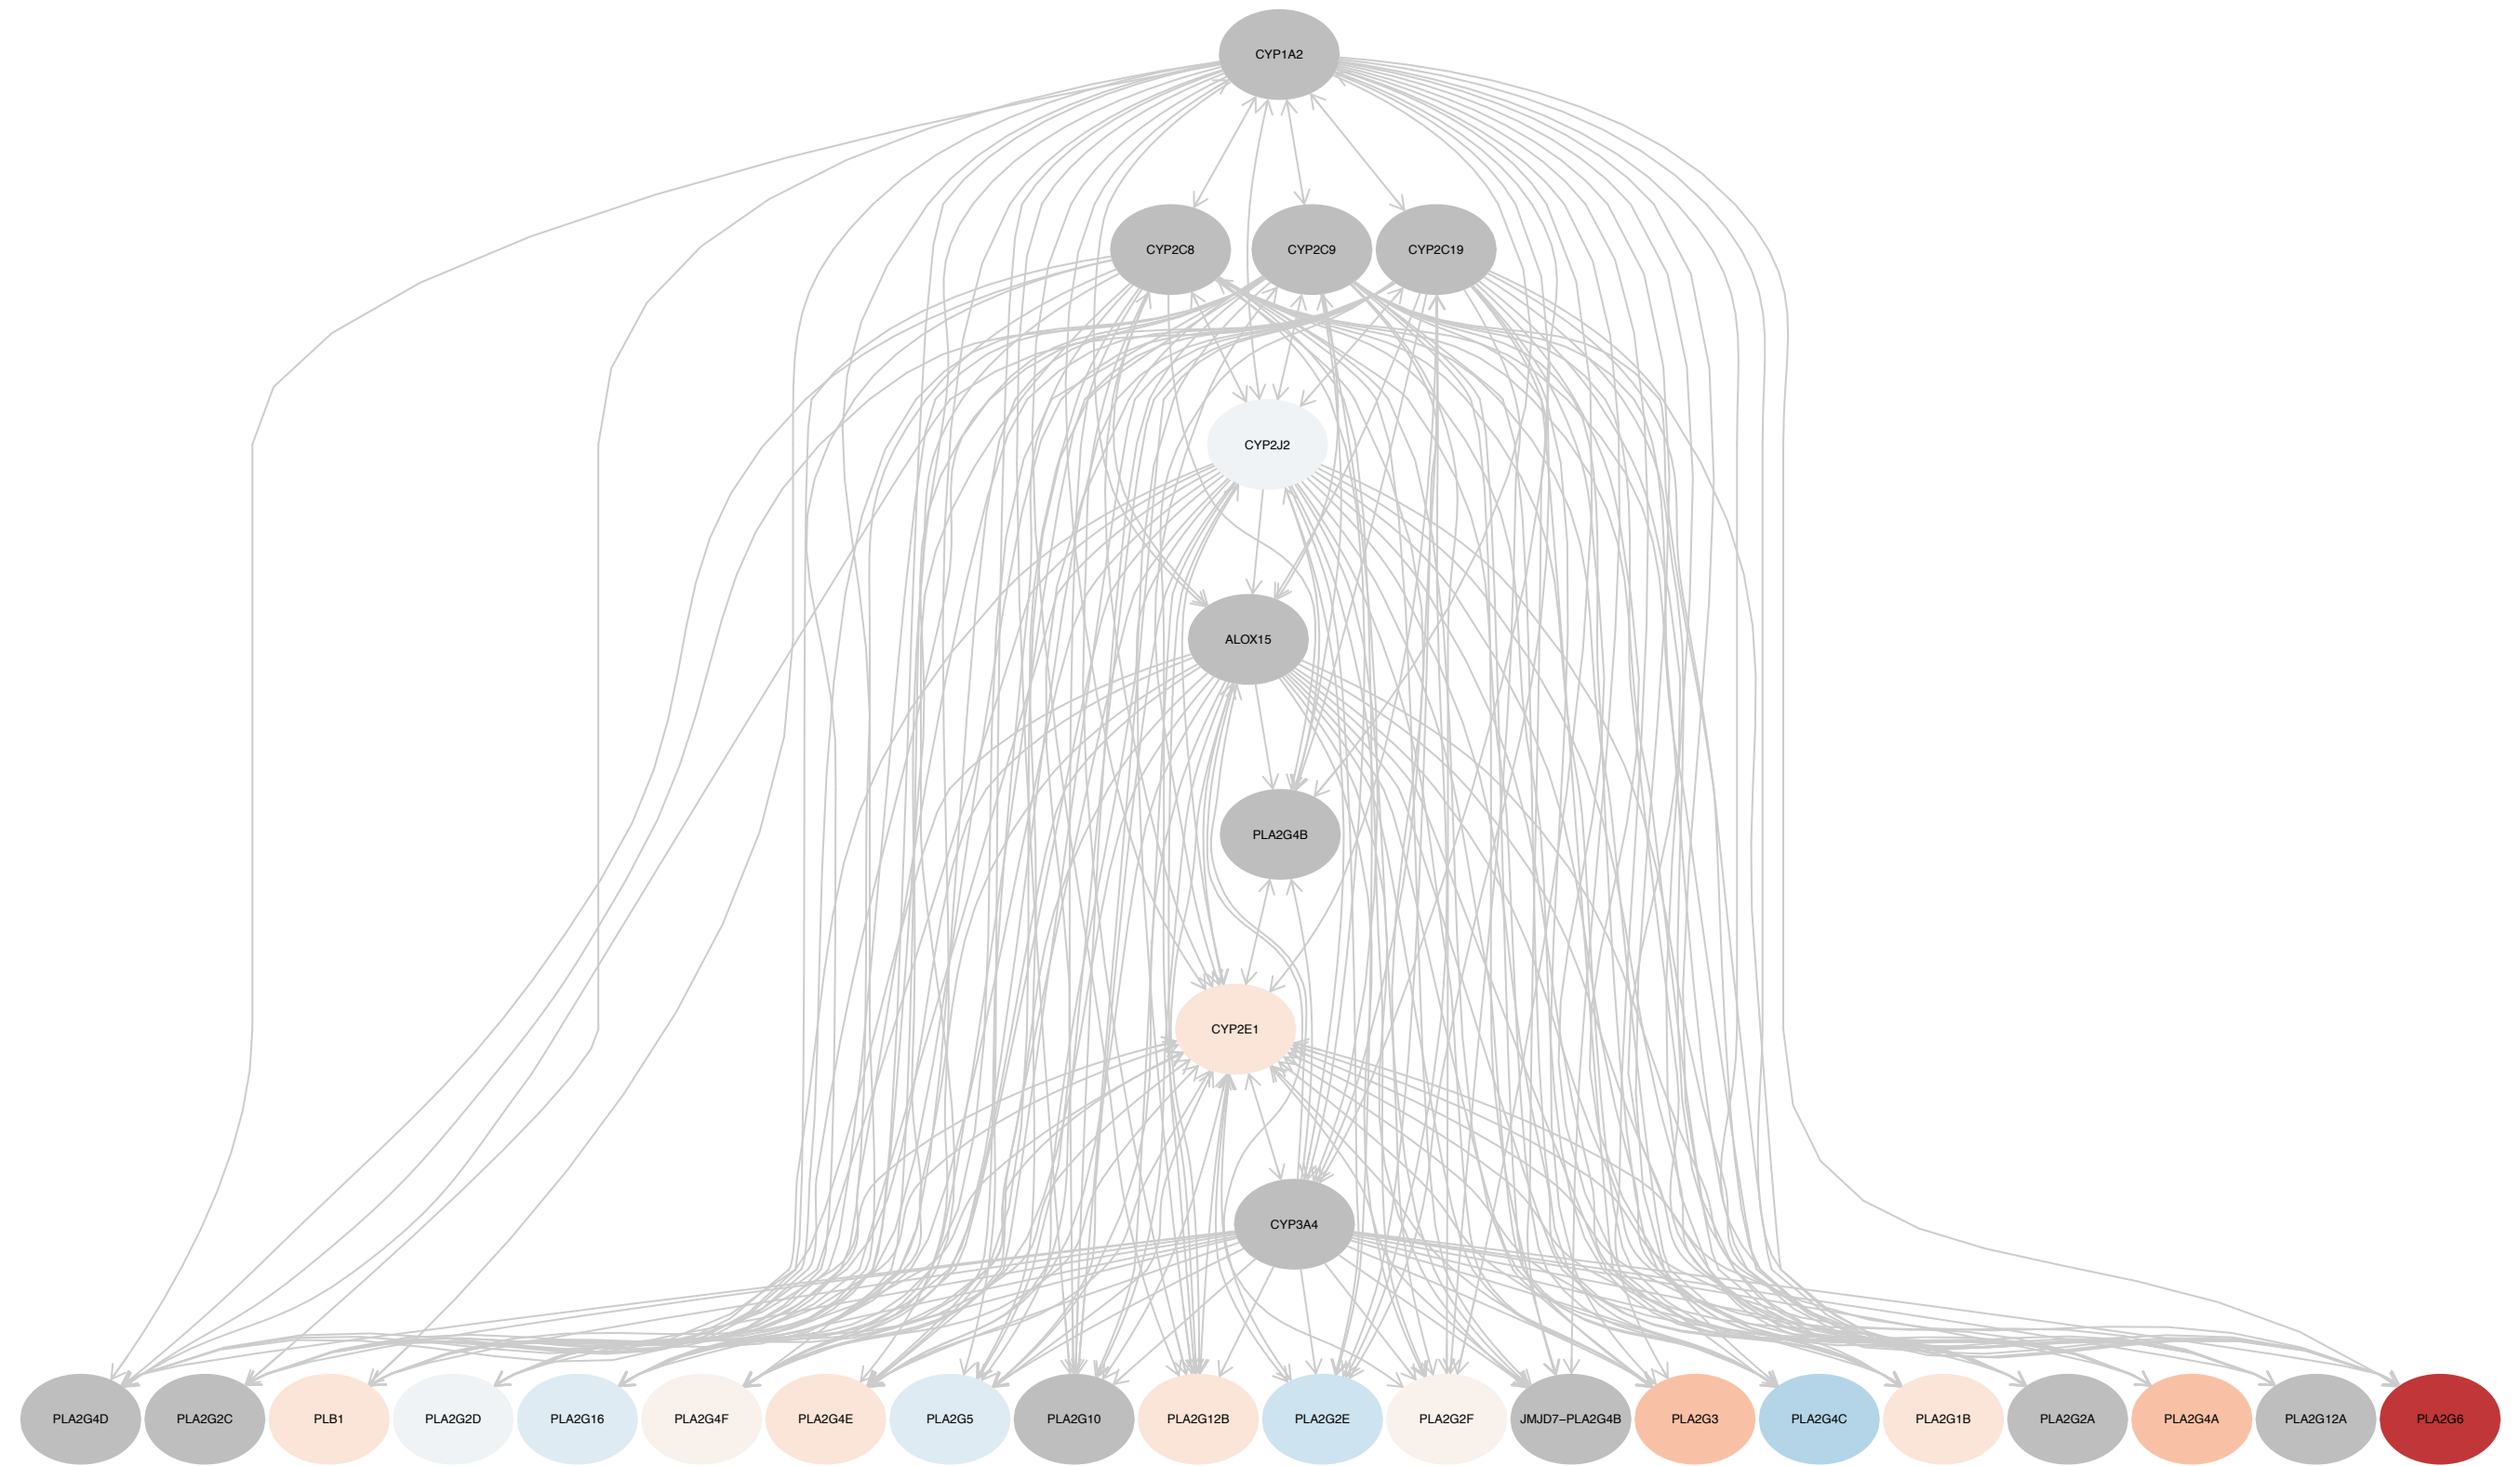

# Ageing



# Development

# Fat digestion and absorption

# Ageing

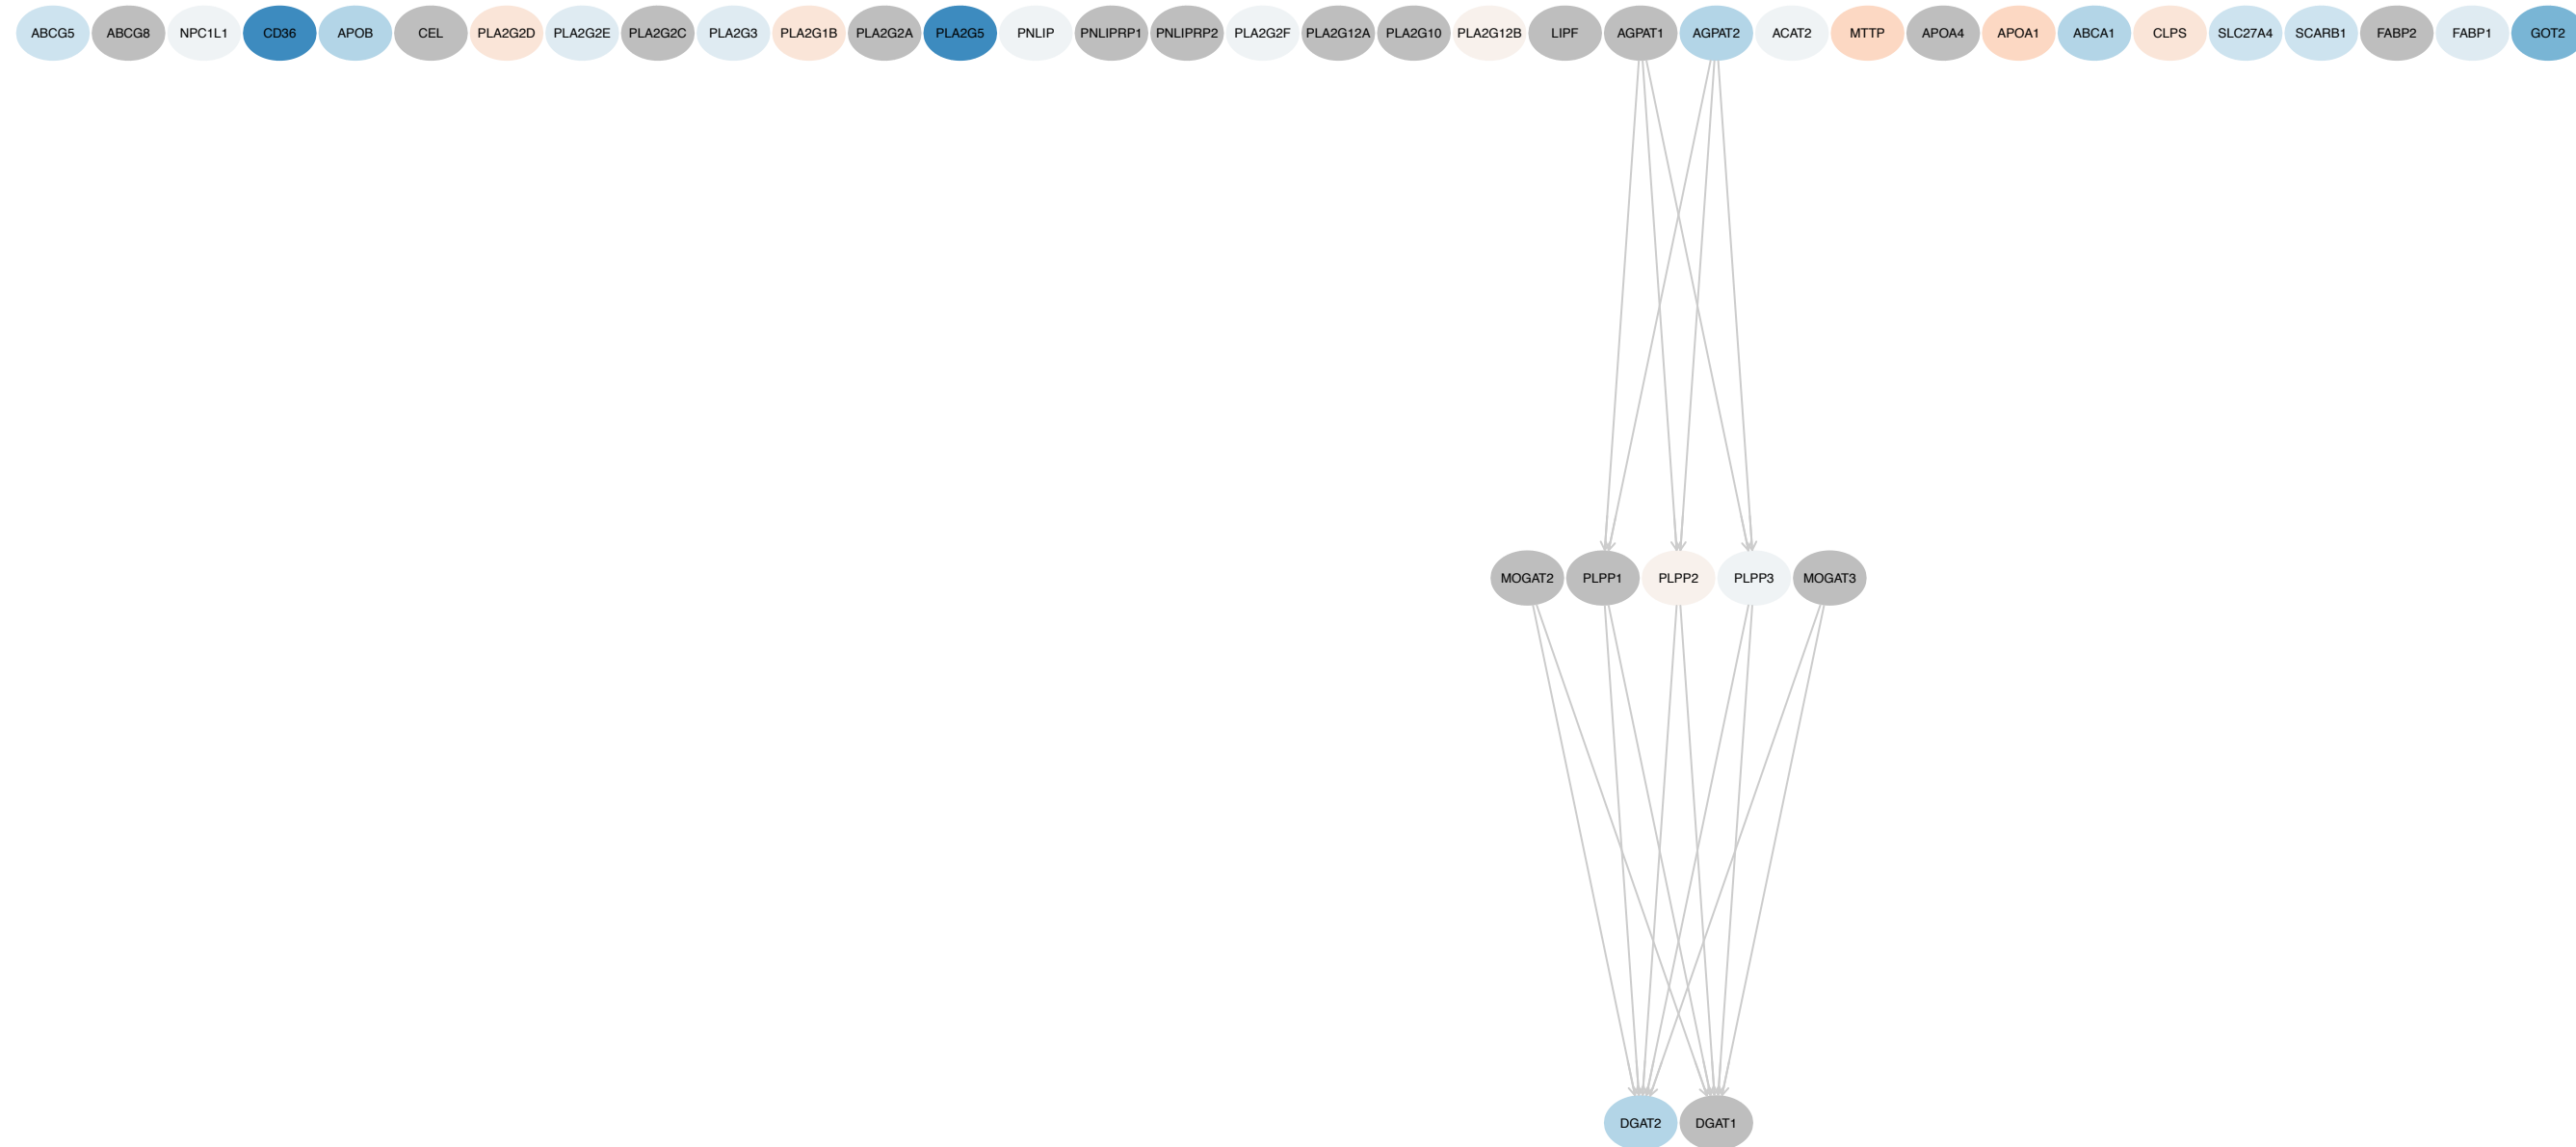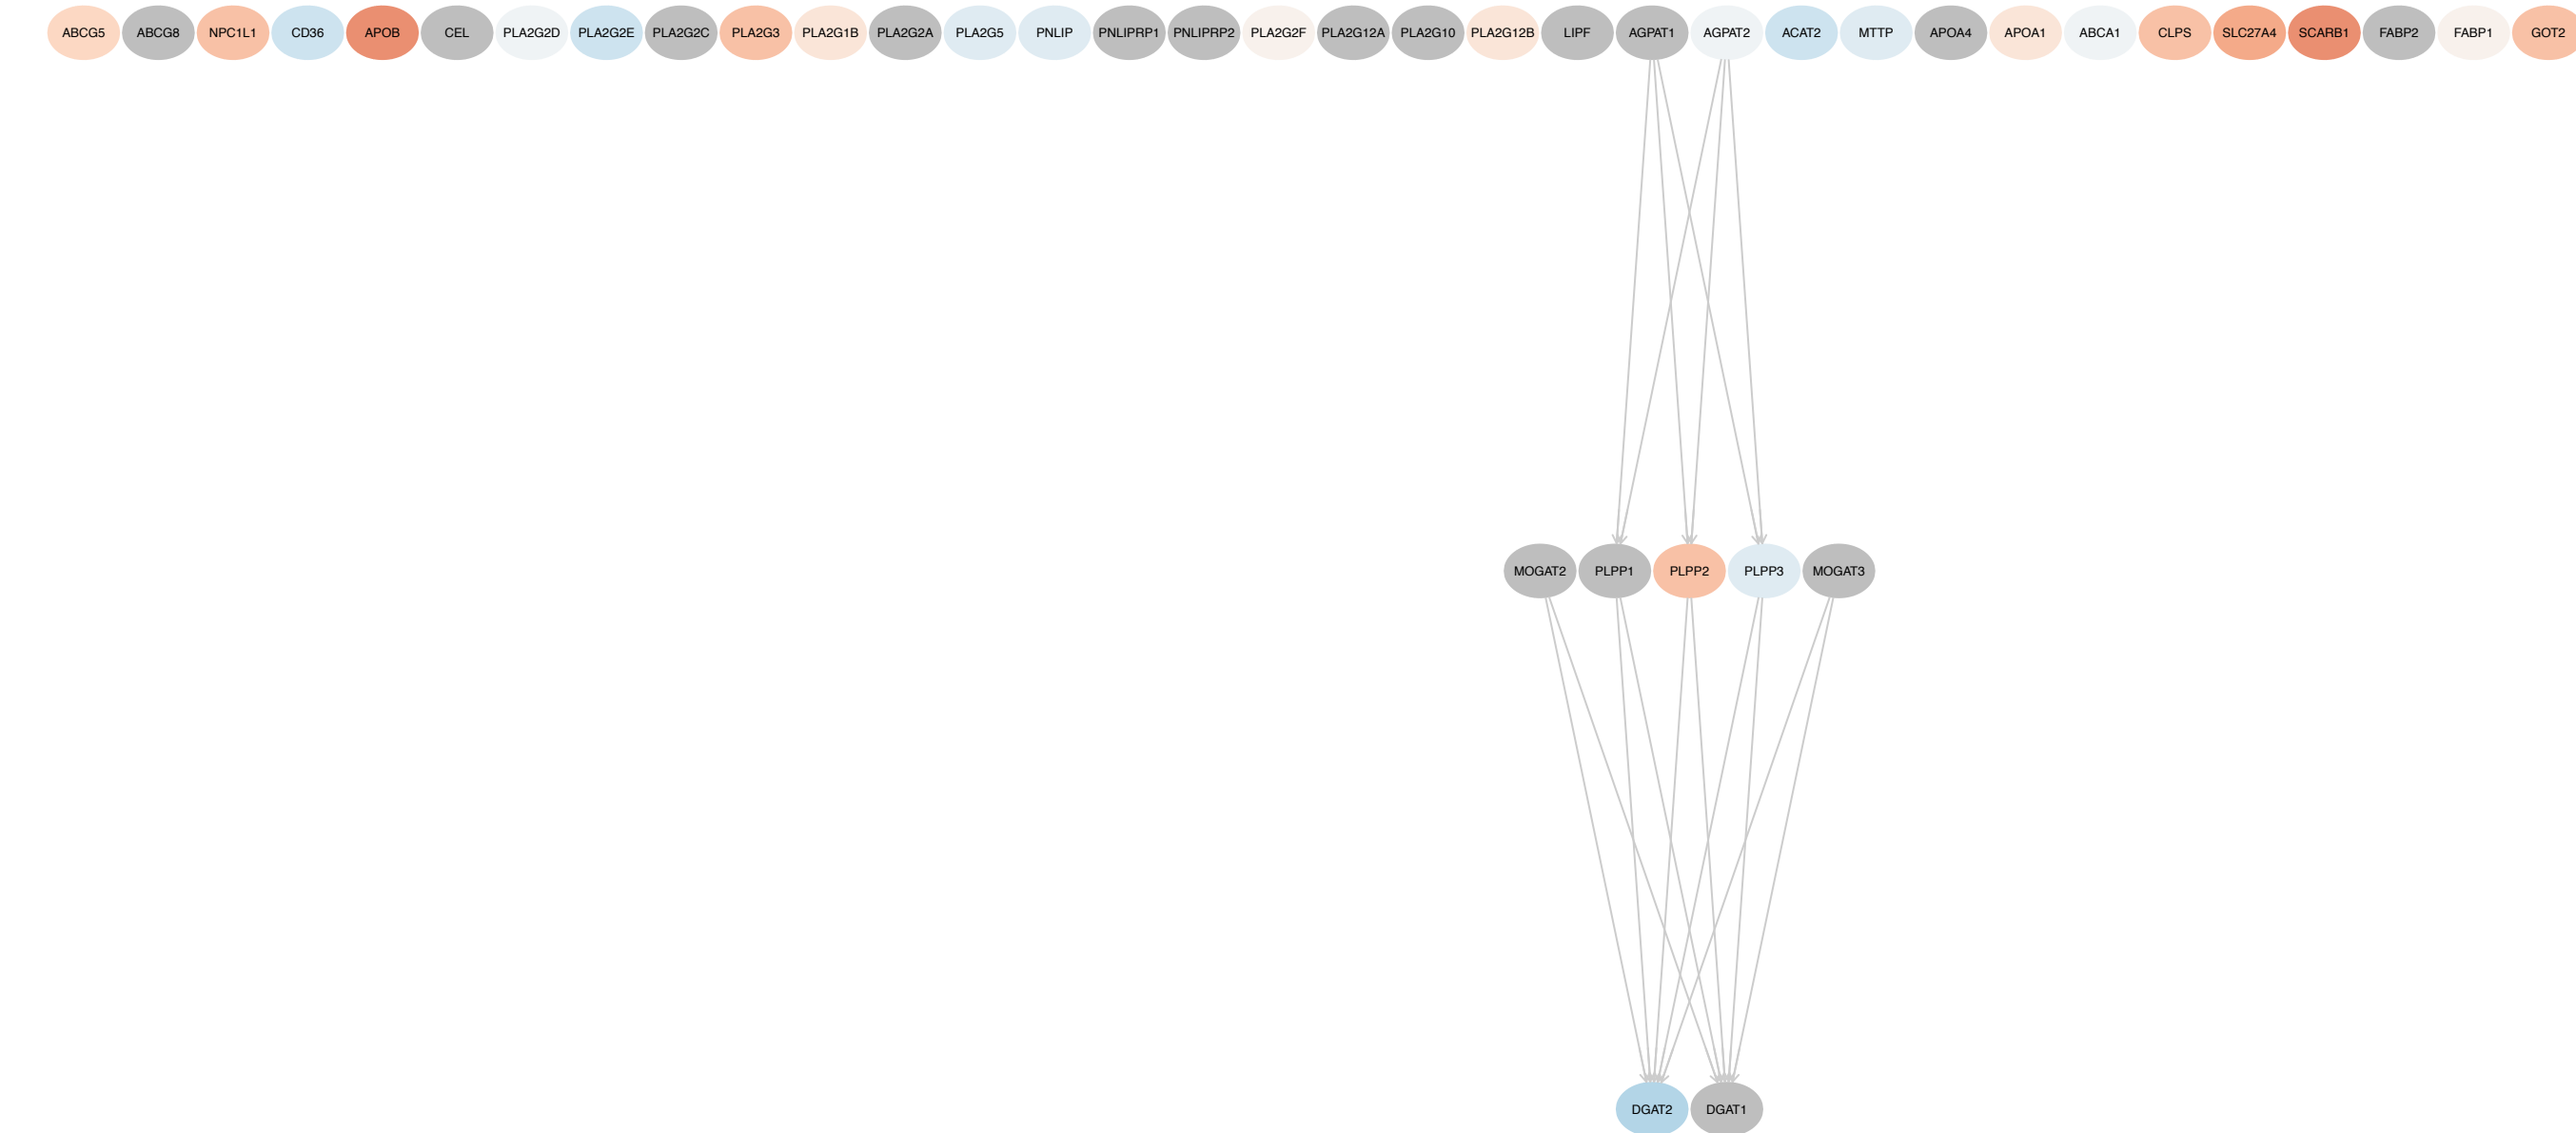

Supplement: Supplementary file [file media-2.pdf]
